# Supplementary material for: The EpiDiverse Plant Epigenome-Wide Association Studies (EWAS) Pipeline
Source: Epigenomes. 2021 May 4;5(2):12. doi: 10.3390/epigenomes5020012 (PMC8594691; doi:10.3390/epigenomes5020012)
Supplement: Supplementary file 1 [file epigenomes-05-00012-s001.zip › epigenomes-1165117-Supplementary.pdf]

Supplementary information for

# The EpiDiverse plant Epigenome-Wide Association Studies (EWAS) pipeline

S. Nilay Can et al.

## Supplementary Figures and Table

### Table of contents

**Figure S1:** WGBS output directory and a bedGraph formatted dataset.

**Figure S2:** Methylome input and the final file after bedtools unionbedg process.

**Figure S3:** DMPs or DMRs output directory and a bed formatted dataset.

**Figure S4:** Required inputs to run EpiDiverse EWAS pipeline with different models.

**Figure S5:** The output of the Emodel.

**Figure S6:** The output of the Gmodel.

**Figure S7:** QQ plots.

**Figure S8:** Histogram plots.

**Figure S9:** Manhattan plots.

**Figure S10:** Sequence dot plots.

**Figure S11:** Top significant k-plots.

**Figure S12:** Non-parametric Wilcoxon test to compare climatic datasets for locations of trees.

**Figure S13:** Coalescence analysis with SNP and averaged methylation data for the CG context.

**Figure S14:** Coalescence analysis with SNP and not averaged methylation data for the CG context.

**Figure S15:** Coalescence analysis with SNP and averaged methylation data for the CHG context.

**Figure S16:** Coalescence analysis with SNP and not averaged methylation data for the CHG context.

**Figure S17:** Coalescence analysis with SNP and averaged methylation data for the CHH context.

**Figure S18:** Coalescence analysis with SNP and not averaged methylation data for the CHH context.

**Figure S19:** fastq raw files HC with k32 done by kWIP software.

**Figure S20:** Intersection of significant Cs with p and q-values on gene-level for methylkit, metilene, and defiant DMR callers.

**Figure S21:** Intersection of outputs with different filter\_NA values for MPs input using all covariates.

**Figure S22:** Intersection of outputs with different filter\_NA values for DMPs input using all covariates.

**Figure S23:** Intersection of outputs with different filter\_NA values for DMRs input using all covariates.

**Figure S24:** Intersection of outputs with different filter\_NA values for MPs input using only location-methylation-based covariates.

**Figure S25:** Intersection of outputs with different filter\_NA values for DMPs input using only location-methylation-based covariates.

**Figure S26:** Intersection of outputs with different filter\_NA values for MPs input using only location-SNP-based covariates.

**Figure S27:** Intersection of outputs with different filter\_NA values for DMPs input using only location-SNP-based covariates.

**Figure S28:** Intersection of outputs with different filter\_NA values for DMRs input using only location-SNP-based covariates.

**Figure S29:** Intersection of outputs with different filter\_NA values for MPs input using only SNP-methylation-based covariates.

**Figure S30:** Intersection of outputs with different filter\_NA values for MPs input using only location-based covariates.

**Figure S31:** Intersection of outputs with different filter\_NA values for DMPs input using only location-based covariates.

**Figure S32:** Intersection of outputs with different filter\_NA values for DMRs input using only location-based covariates.

**Figure S33:** Intersection of shared SNPs and significant common markers between G and GxE models.

**Figure S34:** Intersection of significant BP GO terms between location-based Emodel output and a previous study [5] with UpsetR package.

**Figure S35:** Intersection of significant MF GO terms between location-based Emodel output and a previous study with UpsetR package.

**Figure S36:** Intersection of significant CC GO terms between location-based Emodel output and a previous study with UpsetR package.

**Figure S37:** Highlighted GO terms based on Emodel

**Figure S38:** Intersection of significant BP GO terms between all models, only CG context and precipitation data for location-based clustering, and a previous study with UpsetR package.

**Figure S39:** Intersection of significant MF GO terms between all models, only CG context and precipitation data for location-based clustering, and a previous study with UpsetR package.

**Figure S40:** Intersection of significant CC GO terms between all models, only CG context and precipitation data for location-based clustering, and a previous study with UpsetR package.

**Figure S41:** Gugger et al., 2016 methylation and climatic data processing and analysis by the EpiDiverse EWAS pipeline.

**Figure S42:** Location of *P. abies* trees (a), additional clone information (b), and grouping of trees (c).

**Figure S43:** PCR duplicate analysis.

**Table S1:** *Q. lobata* blastx analysis

**Table S2:** Missing data estimation of EpiDiverse EWAS pipeline (a) and GEM R package (b) [9]. Missing data statistics for *P. abies* dataset with CG (c), CHG (d), and CHH (e) contexts.

**Table S3:** EWAS output and GO statistics.

**Table S4:** Statistics of additional *P. abies* samples.

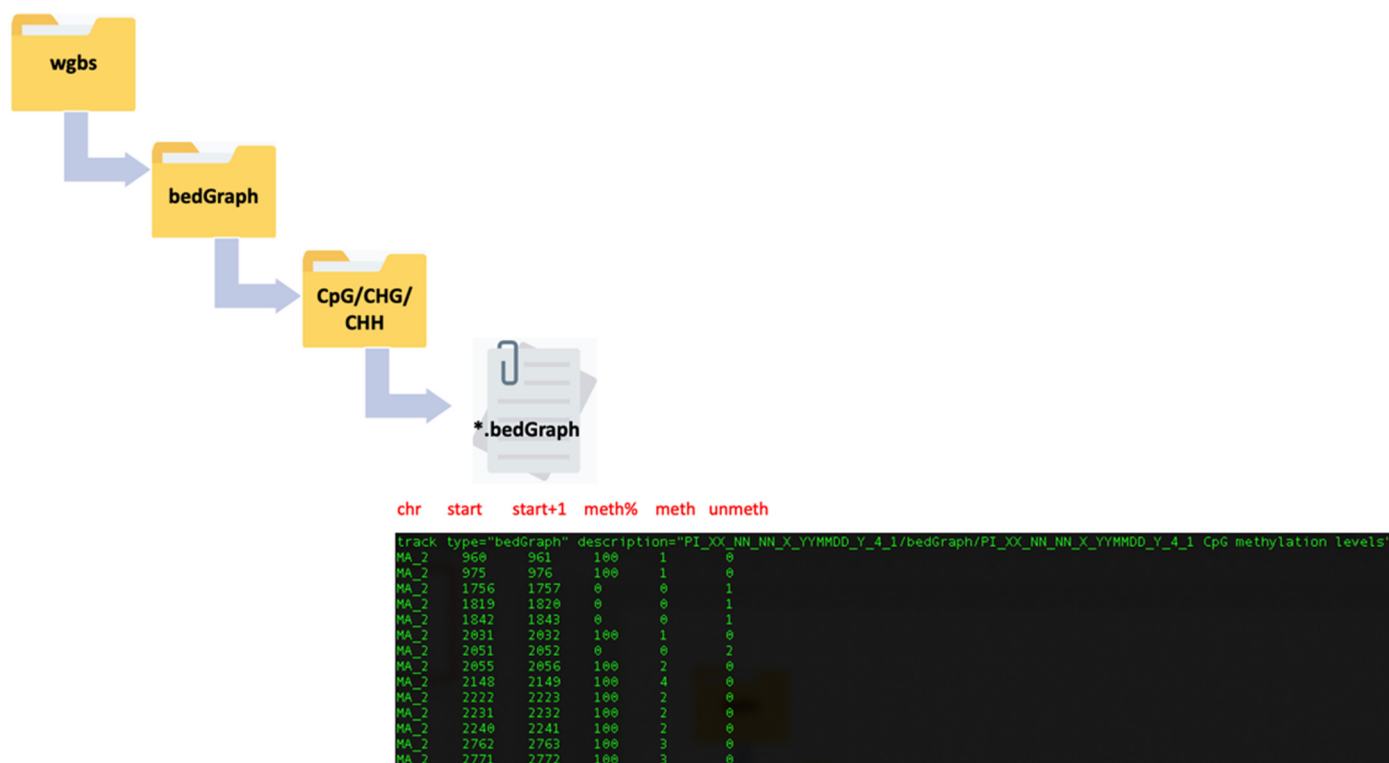

Figure S1: WGBS output directory and a bedGraph formatted dataset.

BedGraph files have a typical MethylDackel (<https://github.com/dpryan79/MethylDackel>) output format, and the user has to provide files in this format. Input files can be filtered by a coverage parameter (sum of fifth and sixth columns).

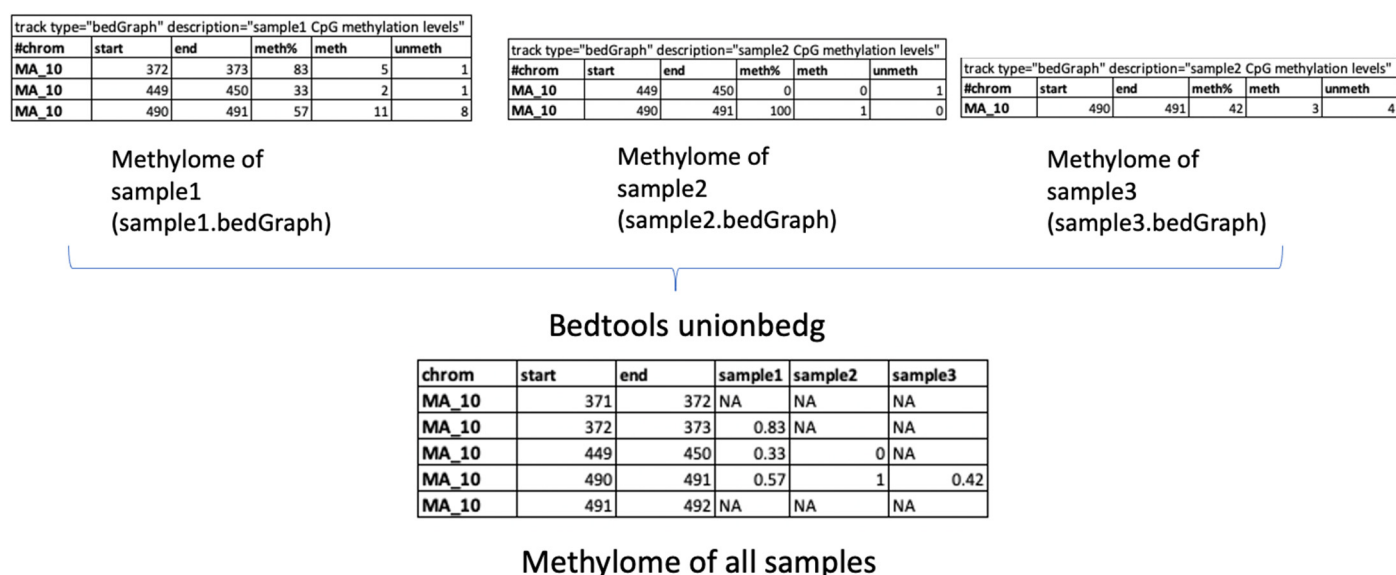

Figure S2: Methylome input and the final file after bedtools unionbedg process.

Each file represents the methylome of a sample and these single bedgraph files need to be united to generate the main methylation file. "Bedtools unionbedg [1] function with -filler NA -i" parameter to fill missing methylation with "NA" (not available) is used for that uniting purpose and the resulting file represents the methylation input file. The user should have this format of bedGraph files to be able to run the pipeline.

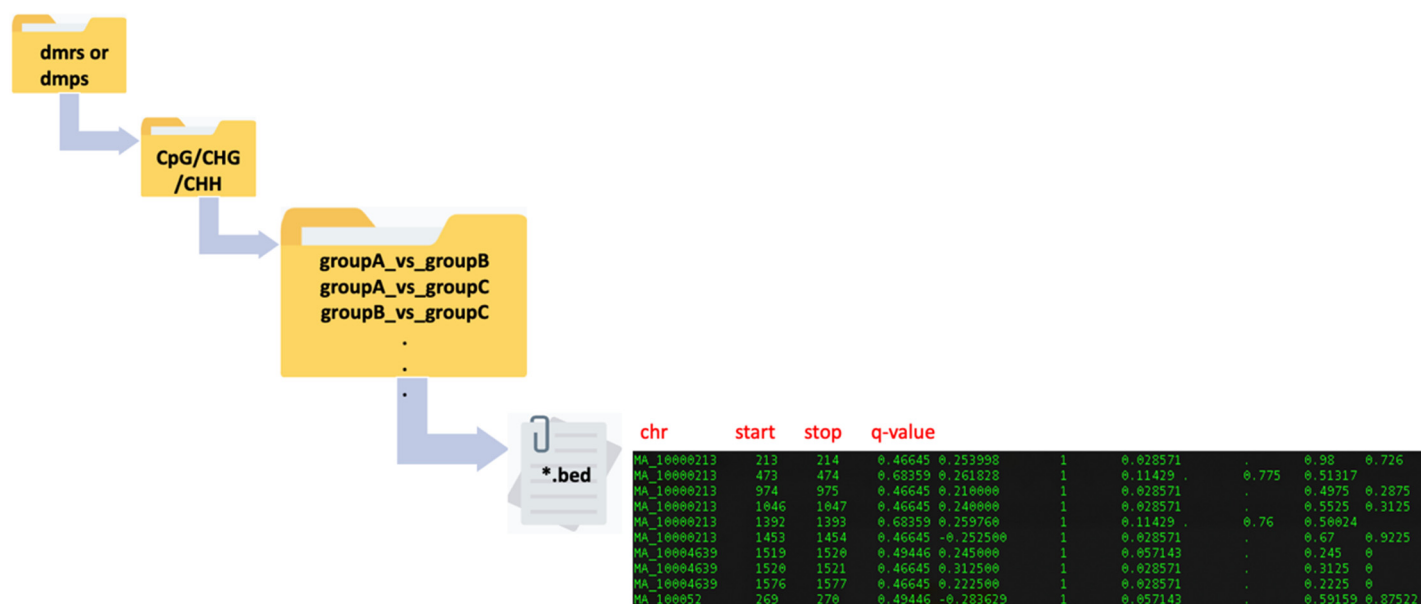

Figure S3: DMPs or DMRs output directory and a bed formatted dataset.

Bed files can be filtered by a “filter\_FDR” parameter based on the fourth column. This is a typical output of metilene DMR caller [2] which is a default methylation caller used in the implementation of the EpiDiverse DMR pipeline, and columns are neglected after the fourth one, so it is enough for a user to have a file with chr, start, stop, and q-value information in order.

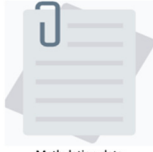

Methylation data  
methylation.txt

| chr              | start | stop | meth sample <sub>1</sub> | meth sample <sub>2</sub> | meth sample <sub>3</sub> | meth sample <sub>4</sub> | meth sample <sub>5</sub> | meth sample <sub>6</sub> | meth sample <sub>7</sub> |
|------------------|-------|------|--------------------------|--------------------------|--------------------------|--------------------------|--------------------------|--------------------------|--------------------------|
| chr <sub>1</sub> | 124   | 125  | 0.45                     | 0.57                     | 0.78                     | 1.00                     | 0.00                     | 0.00                     | 0.00                     |
| chr <sub>2</sub> | 345   | 346  | 0.33                     | 0.35                     | 0.38                     | 0.42                     | 0.45                     | 0.54                     | 0.90                     |
| .....            |       |      |                          |                          |                          |                          |                          |                          |                          |
| chr <sub>n</sub> | 12    | 13   | 1.00                     | 1.00                     | 1.00                     | 0.00                     | 0.00                     | 0.03                     | 0.04                     |

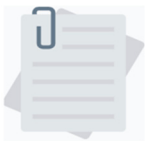

SNP genotype data  
snp.txt

| #SNPs            | sample <sub>1</sub> | sample <sub>2</sub> | sample <sub>3</sub> | sample <sub>4</sub> | sample <sub>5</sub> | sample <sub>6</sub> | sample <sub>7</sub> |
|------------------|---------------------|---------------------|---------------------|---------------------|---------------------|---------------------|---------------------|
| SNP <sub>1</sub> | 1                   | 1                   | 2                   | 2                   | 3                   | 3                   | 3                   |
| SNP <sub>2</sub> | 1                   | 1                   | 2                   | 2                   | 2                   | 2                   | 3                   |
| .....            |                     |                     |                     |                     |                     |                     |                     |
| SNP <sub>n</sub> | 1                   | 2                   | 2                   | 3                   | 3                   | 3                   | 3                   |

1: major homozygote (AA)  
2: heterozygote (AB)  
3: minor homozygote (BB)

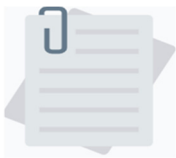

samples.tsv

| #sample names       | Environment value (single) | Covariate(s) can be multiple columns | cov <sub>2</sub> | cov <sub>3</sub> | cov <sub>4</sub> |
|---------------------|----------------------------|--------------------------------------|------------------|------------------|------------------|
| sample <sub>1</sub> | 108.65                     | 1                                    | 1                | 1                | 1                |
| sample <sub>2</sub> | 112                        | 1                                    | 2                | 2                | 1                |
| sample <sub>3</sub> | 156                        | 2                                    | 2                | 2                | 1                |
| sample <sub>4</sub> | 200                        | 2                                    | 2                | 3                | 1                |
| sample <sub>5</sub> | 102.43                     | 3                                    | 2                | 4                | 2                |
| sample <sub>6</sub> | 103.78                     | 3                                    | 3                | 5                | 2                |
| sample <sub>7</sub> | 108                        | 4                                    | 3                | 6                | 2                |

Figure S4: Required inputs to run EpiDiverse EWAS pipeline with different models.

Methylation file is generated by the pipeline using single bedGraph files per sample. SNP genotype matrix is also generated by the pipeline either from multi-sample vcf.gz file or single .vcf files. The only user-provided files are the tab-separated samples.tsv file if other files are generated by EpiDiverse pipelines which carry environment and covariate information. The user can provide only a single environment data regardless of integer or float values. Covariate data should come after the environment data and they can be single or multiple. Values used for covariates are nominal and only for grouping samples depending on the user's needs.

| ID                      | beta                 | stats            | p-value              | FDR       |
|-------------------------|----------------------|------------------|----------------------|-----------|
| MA_14489:23538-23539    | 0.00309592814027513  | 5.58260174194547 | 8.32325006781751e-06 | 0.0495889 |
| MA_10426464:2219-2220   | 0.000972548433628362 | 5.58295616551301 | 8.31571577095554e-06 | 0.0495889 |
| MA_7645347:976-977      | 0.00075589779374216  | 5.58504358017725 | 8.27148147560822e-06 | 0.0495087 |
| MA_3767:29361-29362     | 0.00037794889687108  | 5.58504358017725 | 8.27148147560822e-06 | 0.0495087 |
| MA_10427647:1309-1310   | 0.00037794889687108  | 5.58504358017725 | 8.27148147560822e-06 | 0.0495087 |
| MA_10394370:9851-9852   | 0.00105494852067155  | 5.58684814886495 | 8.23343278630598e-06 | 0.0495087 |
| MA_666458:1936-1937     | 0.00188363311830361  | 5.59002223392068 | 8.16693731763542e-06 | 0.0493398 |
| MA_10431464:4467-4468   | 0.00118021215245349  | 5.59251715824307 | 8.11505139162908e-06 | 0.0491411 |
| MA_10430912:11319-11320 | 0.00104056617820108  | 5.59338279592362 | 8.09712709235094e-06 | 0.0491411 |
| MA_41176:14201-14202    | 0.00135151709301068  | 5.59391786854644 | 8.08606765998442e-06 | 0.0491411 |
| MA_20503:50086-50087    | 0.00084656885720403  | 5.59741918832477 | 8.01407490777187e-06 | 0.048873  |
| MA_10435640:15749-15750 | 0.00172947615747984  | 5.60148922684603 | 7.93120278177804e-06 | 0.048482  |

Figure S5: The output of the Emodel.

This file has "ID|beta|stats|pvalue|FDR" columns where cpq is for significant chr/scaffold names, beta is a beta coefficient in a linear model, stats is the t-statistics for the C in interest, pvalue is the probabilistic score of a C and FDR is corrected p-values, in other words, q-values.

| ID                    | SNP                     | beta                | stats             | p-value              | FDR                |
|-----------------------|-------------------------|---------------------|-------------------|----------------------|--------------------|
| MA_395749:465-466     | MA_8292402:2532-2533    | 0.0583676366217176  | 4.64000229971677  | 9.47326036380823e-05 | 0.0499999751858288 |
| MA_395749:465-466     | MA_10437042:17374-17375 | 0.0583676366217175  | 4.64000229971677  | 9.47326036380823e-05 | 0.0499999751858288 |
| MA_395749:465-466     | MA_10435682:17404-17405 | -0.0583676366217175 | -4.64000229971677 | 9.47326036380833e-05 | 0.0499999751858288 |
| MA_395749:465-466     | MA_10435682:17404-17405 | 0.0583676366217175  | 4.64000229971677  | 9.47326036380833e-05 | 0.0499999751858288 |
| MA_10302644:7598-7599 | MA_45157:14959-14960    | 0.0828140703517588  | 4.64000159732888  | 9.47327761869289e-05 | 0.0500000583090976 |
| MA_10302644:7598-7599 | MA_45157:14974-14975    | 0.0828140703517588  | 4.64000159732888  | 9.47327761869289e-05 | 0.0500000583090976 |
| MA_10426291:3069-3070 | MA_89747:15112-15113    | -0.0565140073081608 | -4.64000106859483 | 9.47329060761196e-05 | 0.0500001228906404 |
| MA_10372599:1442-1443 | MA_15175:36373-36374    | 0.479535192563081   | 4.63999719636802  | 9.47338573356091e-05 | 0.0500006209922063 |
| MA_14988:11612-11613  | MA_371398:6472-6473     | 0.0913369139207432  | 4.63999636335537  | 9.47340619765198e-05 | 0.0500007250277207 |

Figure S6: The output of the Gmodel.

It is a list of C-SNP pairs, where the SNP is the appropriate couple to explain CG in interest. The only different column from the Emodel output is the additional "snp" column next to the ID column. The output of the GxE model is the same.

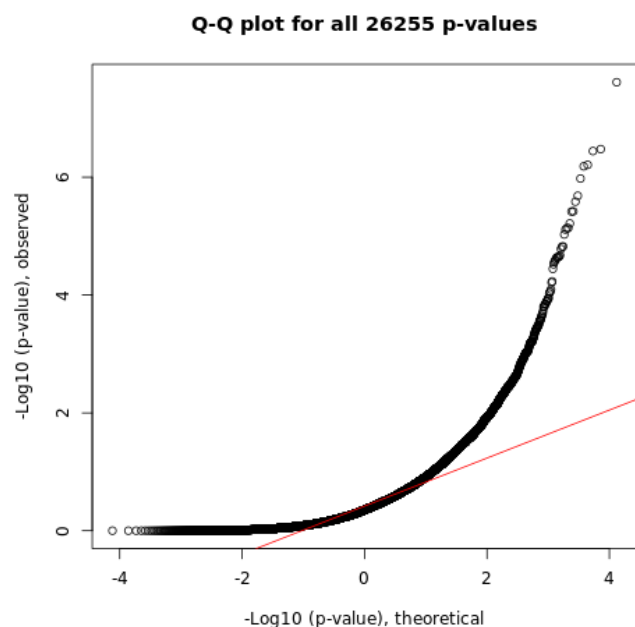

Figure S7: QQ plots.

Q-Q plots are generated with all models and give a theoretical vs observed distribution of all p-values. The x-axis is an indicator of normal distribution and ranges between [-4,4]. A total number of p-values can be seen in the header.

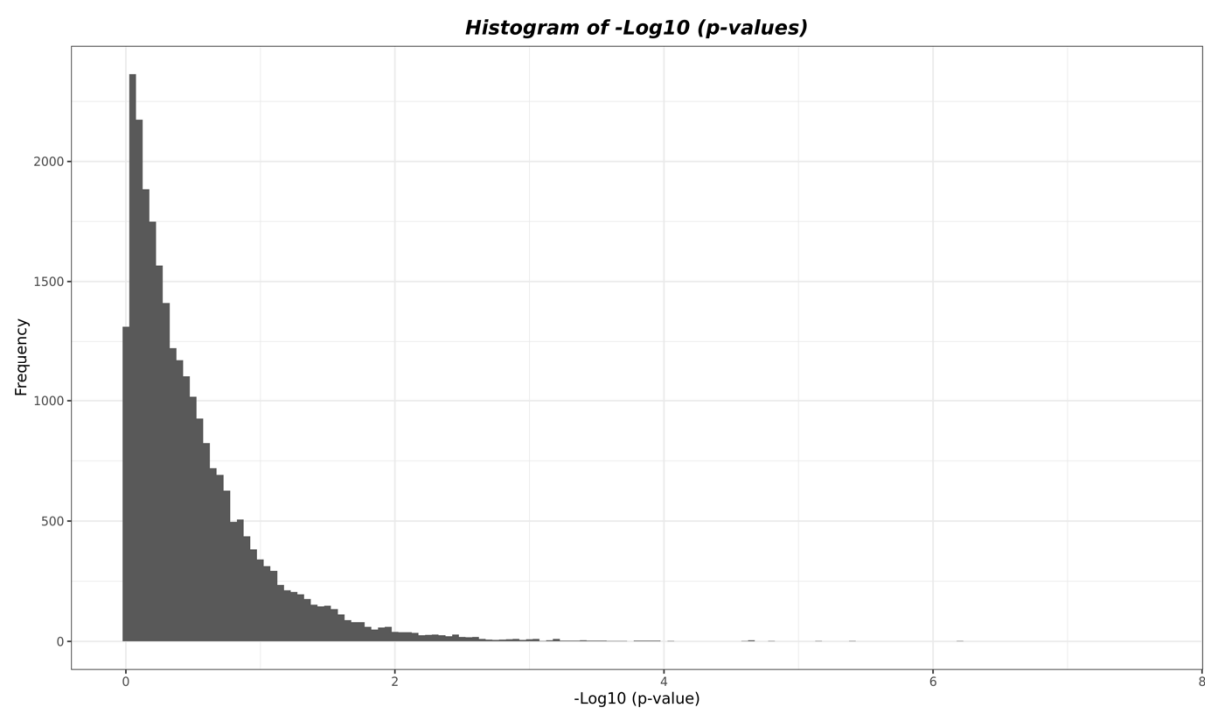

Figure S8: **Histograms plots.**

Histograms are generated with every model and drawn with all p-values to get an insight into their distribution. The x-axis is based on  $-\log_{10}$  transformation and the y-axis show frequency.

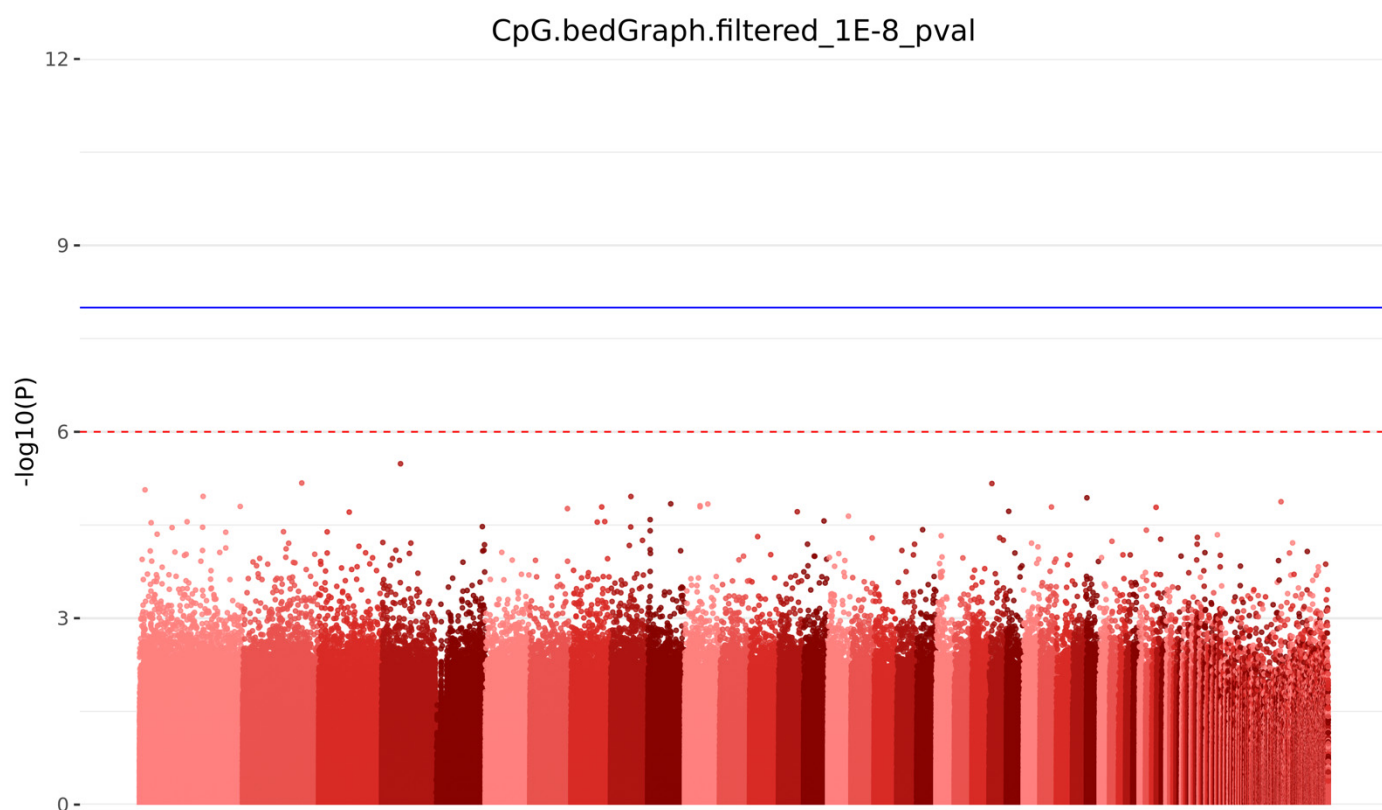

Figure S9: **Manhattan plots.**

Example of Manhattan plot output for CpG context and Emodel from the EWAS pipeline, representing all positions below p-value  $1e^{-8}$ . The dashed red line is a suggestive threshold ( $10^{-6}$  by default) and the blue line shows the epigenome-wide significance threshold (suggestive threshold / 100) to narrow down highly significant biomarkers above the lines.

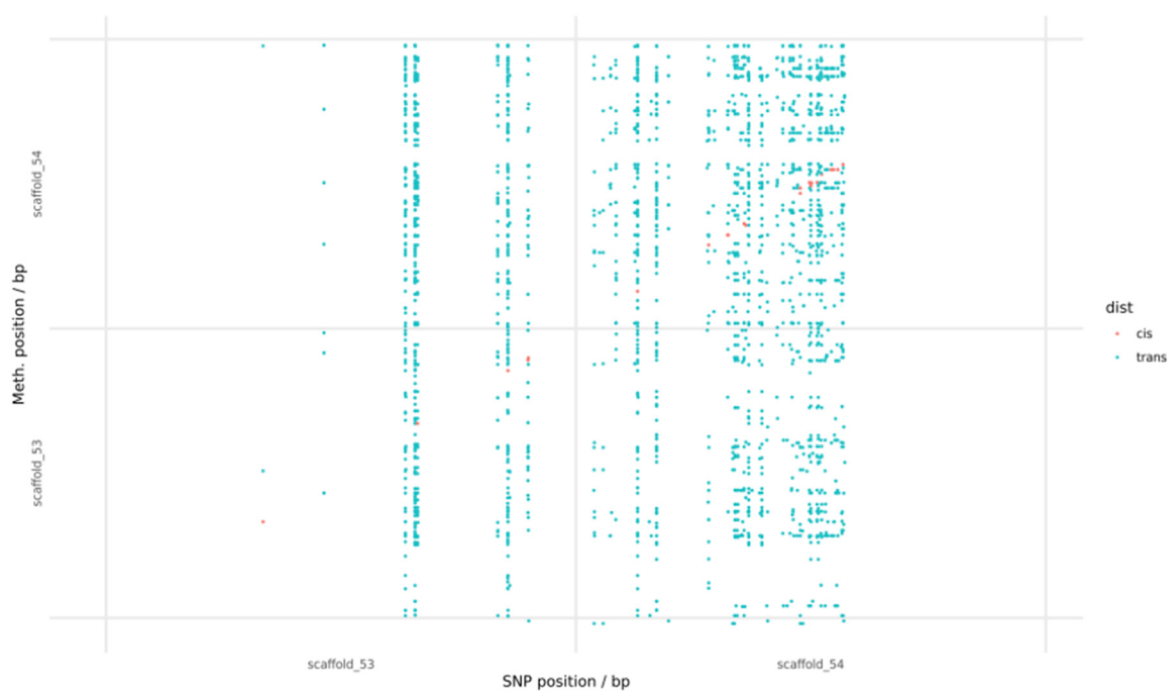

Figure S10: **Sequence dot plots.**

They are generated with the G model using Plotly with relative positions of SNPs and methylated positions in significant methQTLs. Cis and trans SNP-Cytosine pairs are marked as red and blue respectively. Scaffold/chr names are written on axes.

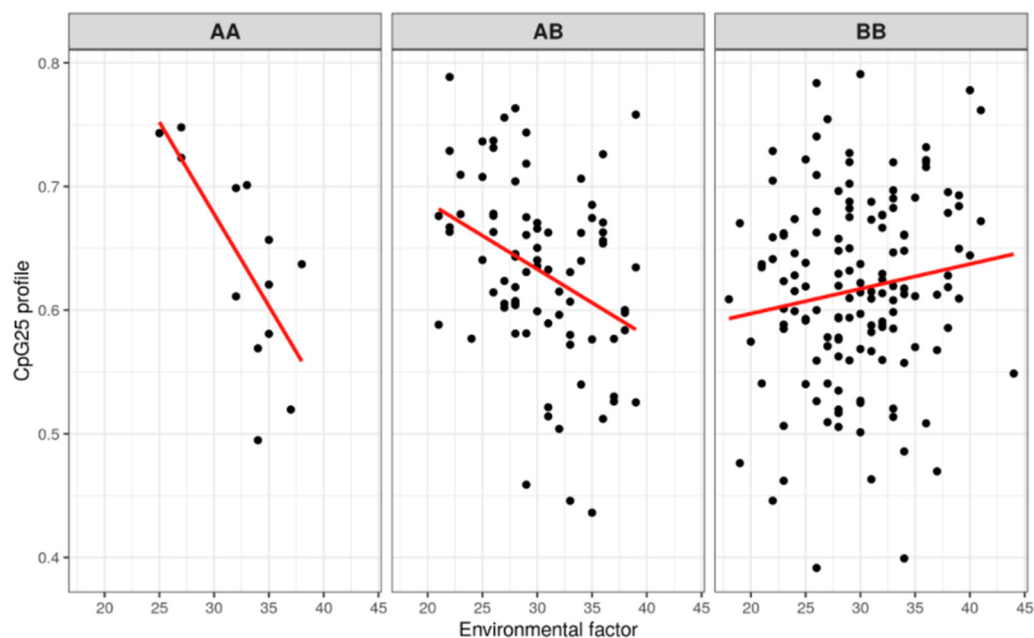

Figure S11: Top significant k-plots.

Top k-plots are generated with the phenotypic trait for major allele homozygote (AA), heterozygote (AB), and minor allele homozygote (BB) for all SNPs across all samples are generated with the GxE model. Significant Cytosine name is indicated at the left, not necessarily three alleles have to be produced with each C, the red line shows the slope of the linear relationship between individuals, dots (samples) and environmental factor (climatic data) is shown on the x-axis, methylation beta values are seen on the y-axis. Ref: Pan et al., 2016.

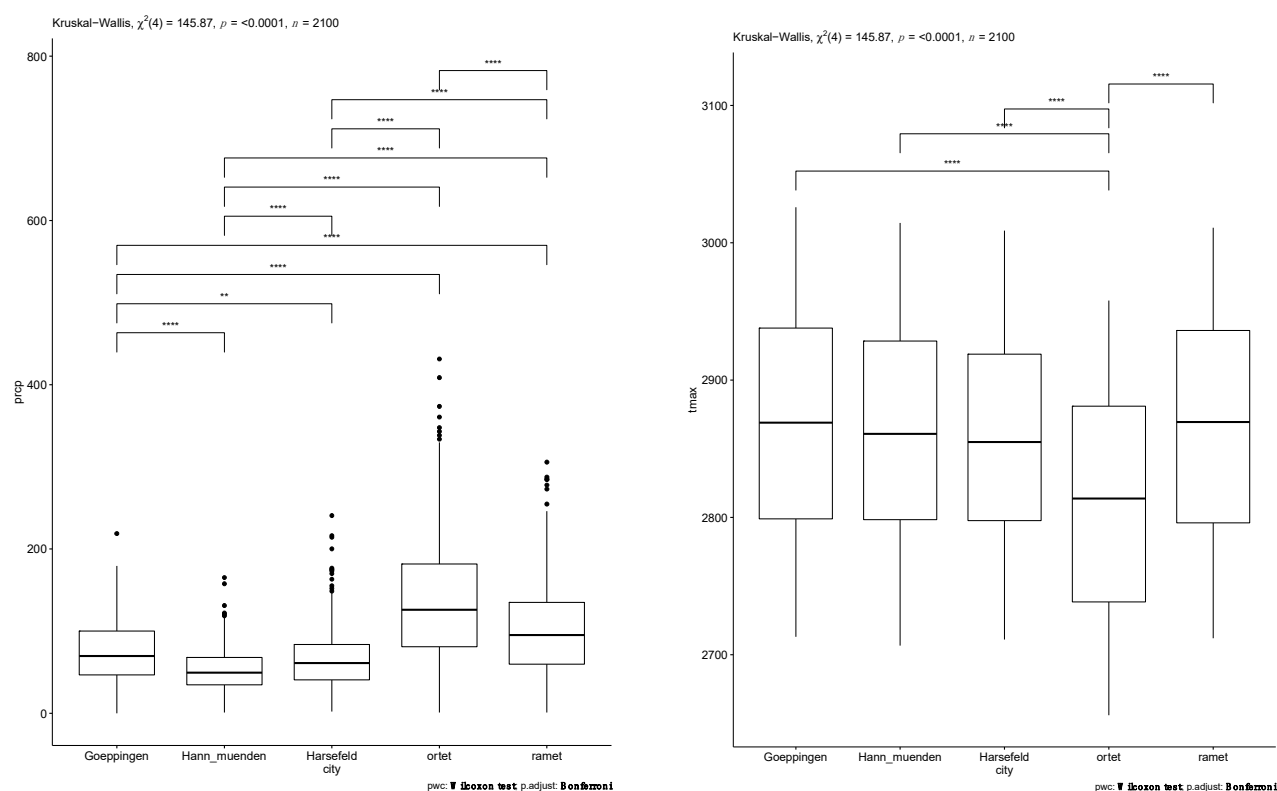

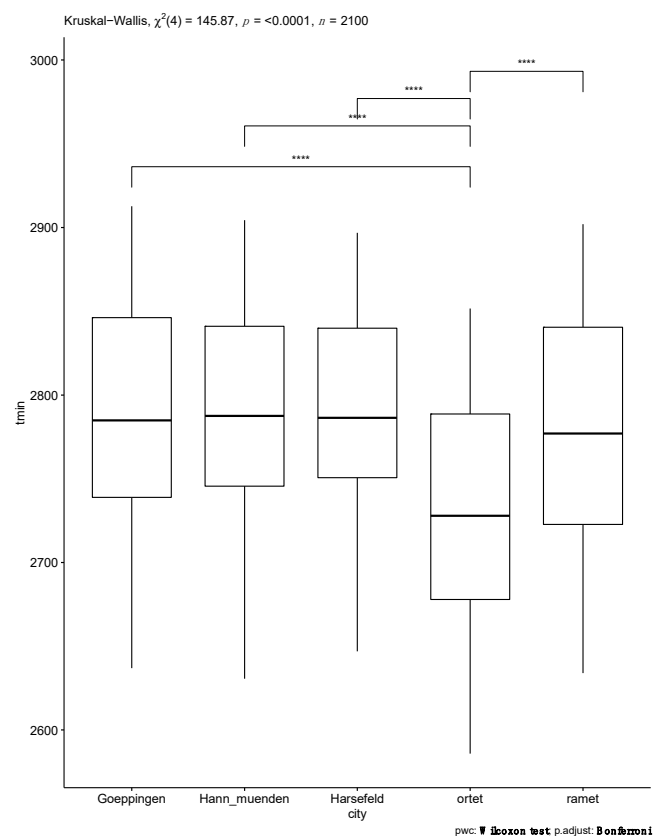

Figure S12: Non-parametric Wilcoxon test to compare climatic datasets for locations of trees.

Boxplots and test results for precipitation (prcp) (upper left), maximum temperature (tmax) (upper right), and minimum temperature (lower) datasets. All differences were found significant for the prcp data. Differences between ortet and all other locations were found significant for tmax and tmin data.

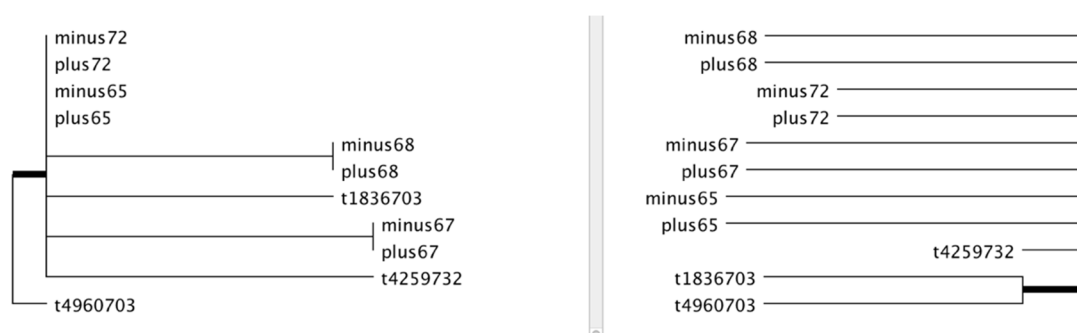

Figure S13: Coalescence analysis with SNP and averaged methylation data for the CG context.

Averaged methylation calls (left) and SNP (right) tree comparison output with compare2trees software [3] for the CG context. This comparison yields a 72% topological score indicating a relatively high fraction of clades/branches present in both trees (cf. Methods for details). The thick branches represent deviating topologies.

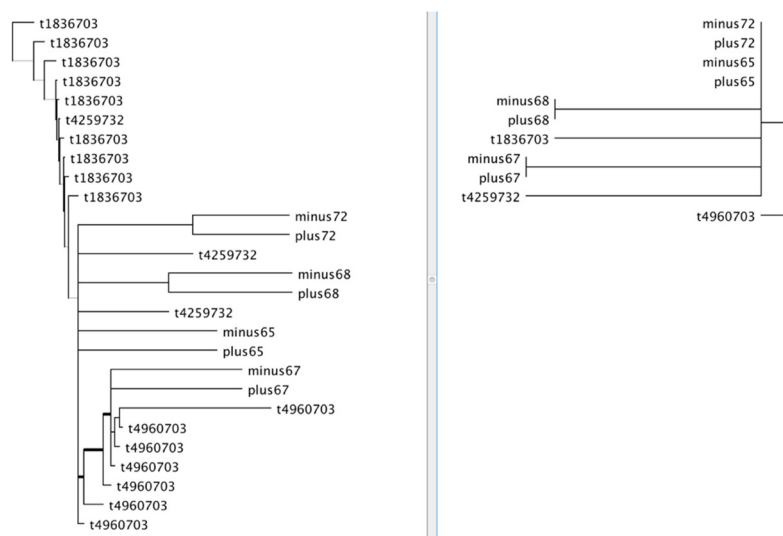

Figure S14: Coalescence analysis with SNP and not averaged methylation data for the CG context.

Not averaged methylation calls (left) and SNP (right) tree comparison output with compare2trees software [3] for the CG context. This comparison has a 78.7% over topological score indicating a relatively high fraction of clades/branches present in both trees (cf. Methods for details). The thick branches represent deviating topologies.

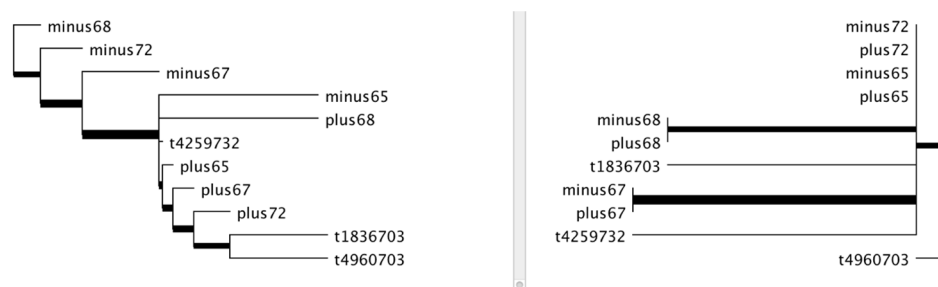

Figure S15: Coalescence analysis with SNP and averaged methylation data for the CHG context.

Averaged methylation calls (left) and SNP (right) tree comparison output with compare2trees software [3] for the CG context. This comparison has a 38.2% over topological score indicating a relatively low fraction of clades/branches present in both trees (cf. Methods for details). The thick branches represent deviating topologies.

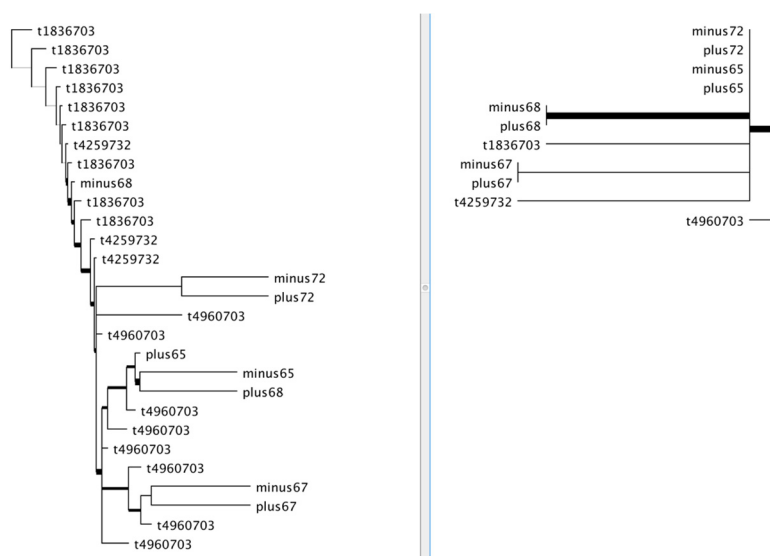

Figure S16: Coalescence analysis with SNP and not averaged methylation data for the CHG context.

Not averaged methylation calls (left) and SNP (right) tree comparison output with compare2trees software [3] for the CG context. This comparison has a 58.5% over topological score which indicating a medium fraction of clades/branches present in both trees (cf. Methods for details). The thick branches represent deviating topologies.

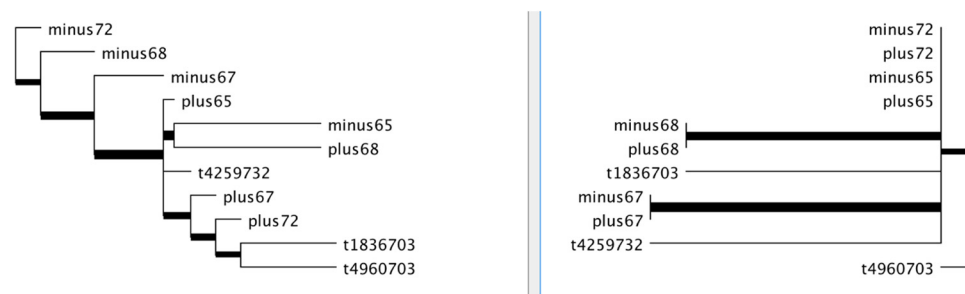

Figure S17: Coalescence analysis with SNP and averaged methylation data for the CHH context.

Averaged methylation calls (left) and SNP (right) tree comparison output with compare2trees software [3] for the CG context. This comparison has a 42.3% over topological score indicating a relatively low fraction of clades/branches present in both trees (cf. Methods for details). The thick branches represent deviating topologies.

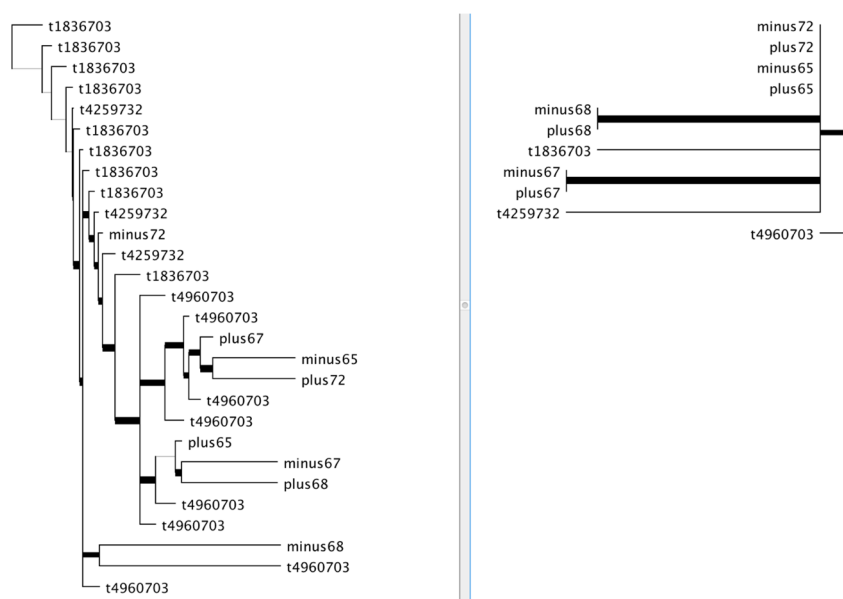

Figure S18: Coalescence analysis with SNP and not averaged methylation data for the CHH context.

Not averaged methylation calls (left) and SNP (right) tree comparison output with compare2trees software [3] for the CG context. This comparison has a 35.3% over topological score indicating a relatively low fraction of clades/branches present in both trees (cf. Methods for details). The thick branches represent deviating topologies.

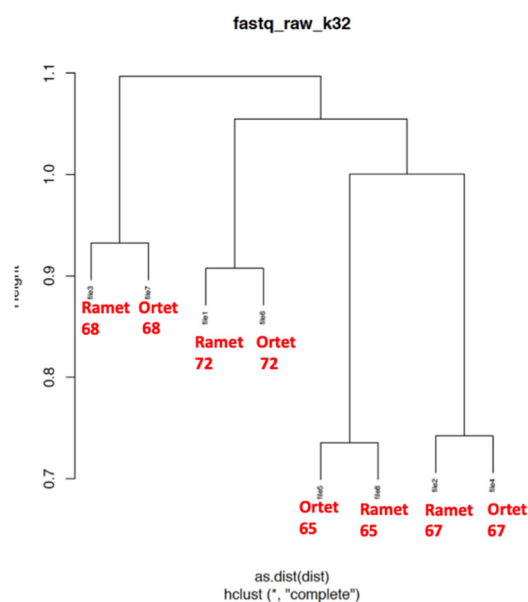

Figure S19: fastq raw files HC with k32 done by kWIP software [4].

Clear clustering is seen between clones and original tree pairs can be pointed and names in red were added later to clarify observation.

### DMP/DMR Analysis using different callers

Metilene was not able to call FDR corrected DMPs due to the implemented statistics (the rank test does not have enough power to yield significant q-values). The high total number of tests required to process all DMPs leads to no significant results after FDR filtering which is a relatively common problem of adjusting p-values for big datasets [5]. Yet, as shown above, almost all q-value filtered defiant DMPs and the majority of q-value filtered methylkit DMPs are shared with the p-value filtered metilene DMPs. This shows that DMP calling is relatively robust, but that using metilene's p-value filtered DMPs will include many (potentially false positive) positions not detected when applying FDR correction. To test whether this abundance of positions would bias the detection of significant positions, we compared the EWAS output for GC context of the ramet vs. ortet comparison (based on the metilene  $p < 0.05$  DMPs) with the defiant results. We found that the overlap is significantly (Fisher's exact test,  $p < 0.05$ ) more than expected by chance for G as well as the GxE model for the prcp environmental variable (Figure S20c).

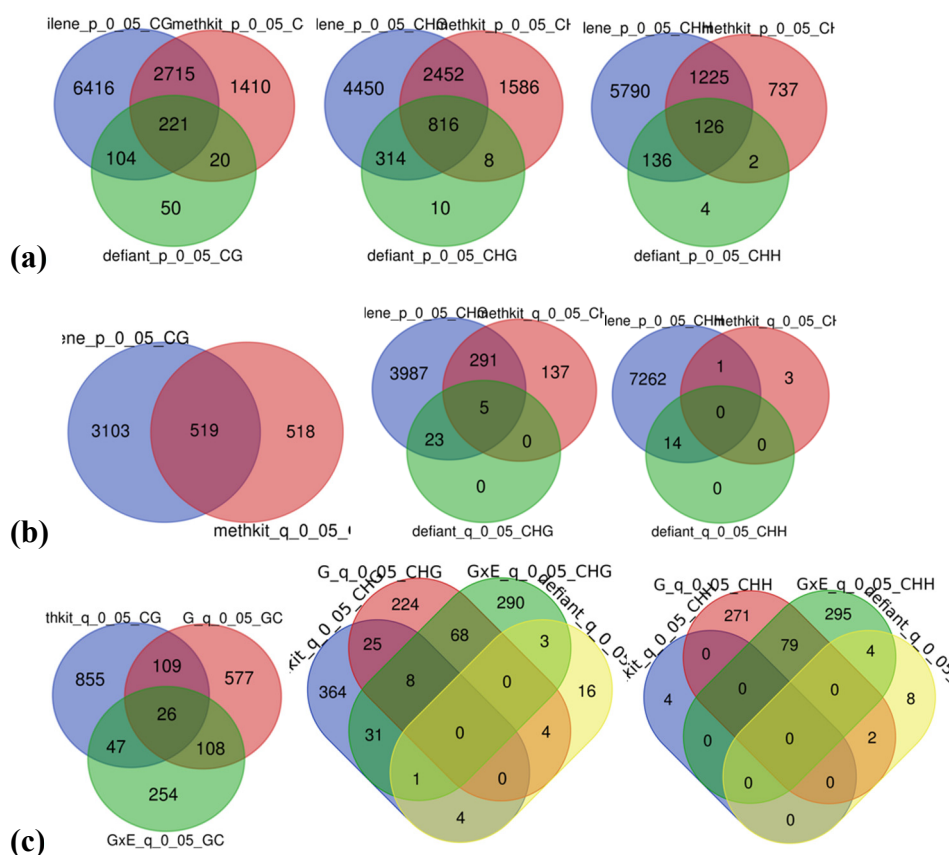

Figure S20: Intersection of significant Cs with p and q-values on gene-level for methylkit, metilene, and defiant DMR callers.

(a) Genes with 0.05 p-value cut-off between metilene, methylkit, and defiant for CG (left), CHG (middle), and CHH (right) for ramets vs ortets comparison. 32%, 44% & 20% of metilene genes, 0.55, 0.90 & 0.98 of defiant DMPs and 67%, 67% & 64% of methylkit genes are shared with other two. Metilene genes have the highest excluded amount. Diagrams (separated by contexts like CG, CHG, and CHH from left to right) in (b) shows the 0.05 q-value cut-off genes with DMR callers again with ramets vs ortets comparison, unfortunately, no gene(s) were found related to the CG context DMP(s) and 14% of metilene genes are shared with the methylkit ones. All, 7% and 68% of DMPs are shared by either one of two other genes for defiant, metilene, and methylkit respectively for CHG context and numbers are like again all, 0.1% and 25 for defiant, metilene, and methylkit. Diagrams in (c) show the intersection between pipeline output and the DMR callers between ramets and ortets. 13% and 7% of methylkit genes are shared between Gmodel and GxE models (left). CHG (middle) and CHH (right) genes exclusively shared by a single diagram of two diagrams.

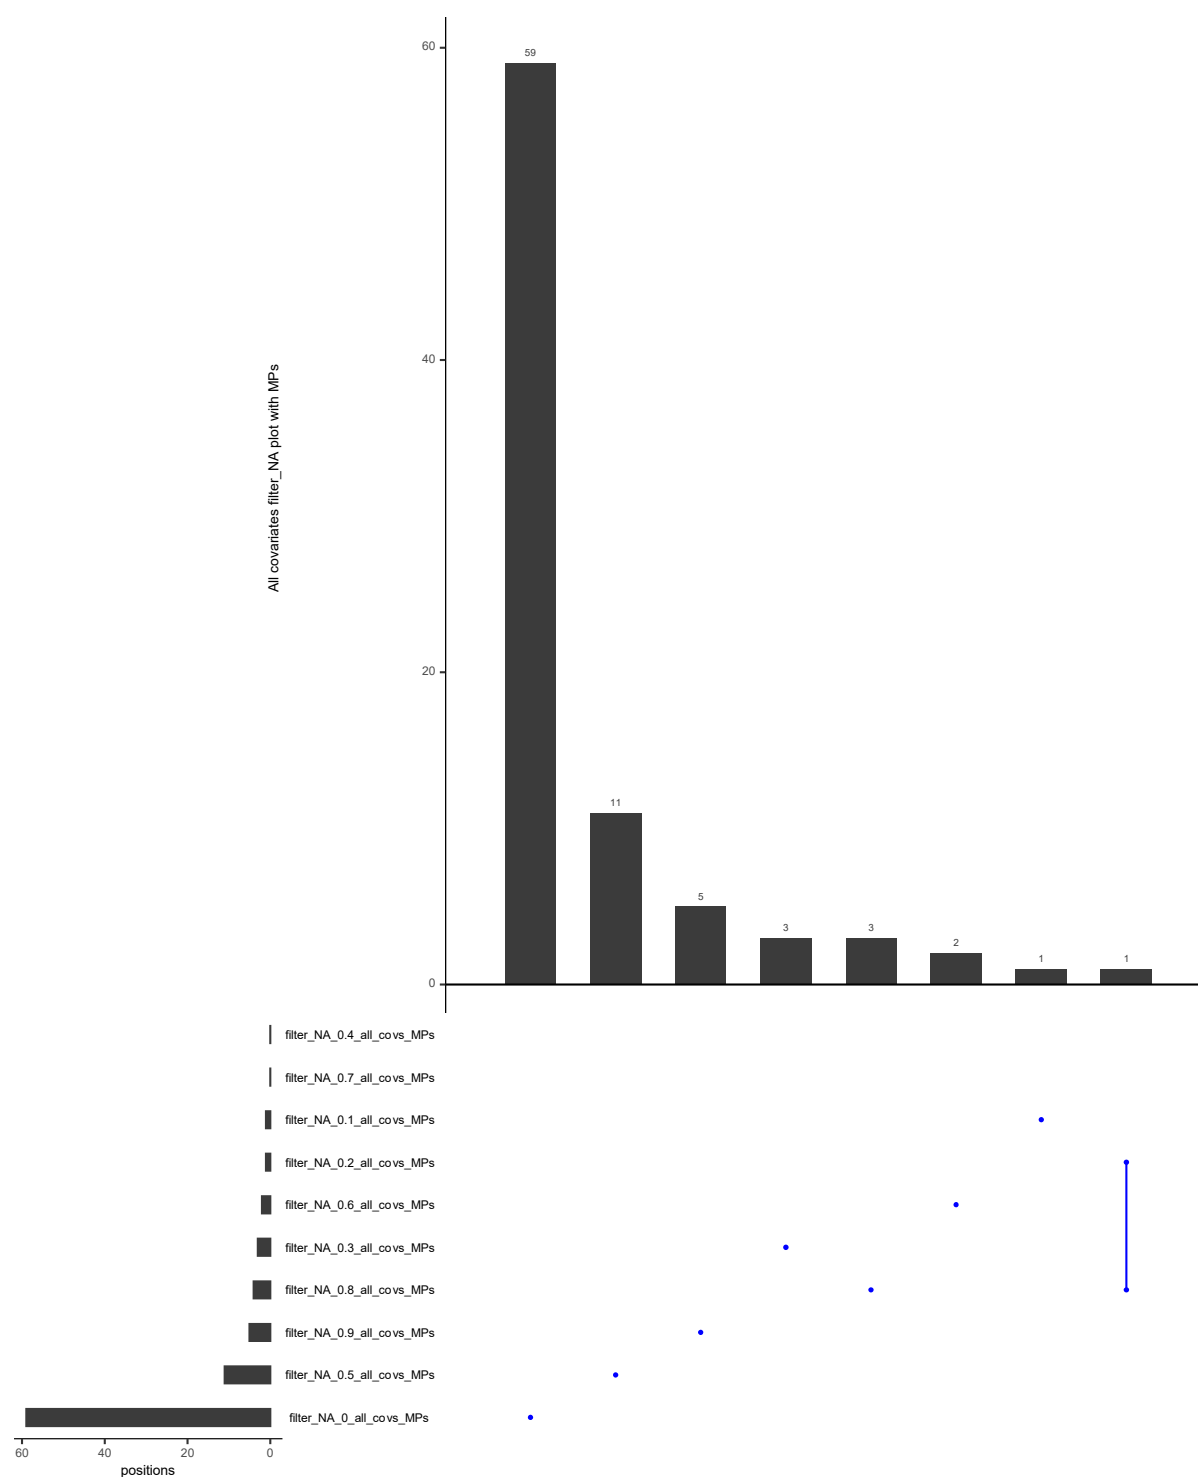

Figure S21: Intersection of outputs with different `filter_NA` values for MPs input using all covariates.

There is a single intersection with 0.2 and 0.8 `filter_NA` values and the rest has unique outputs.

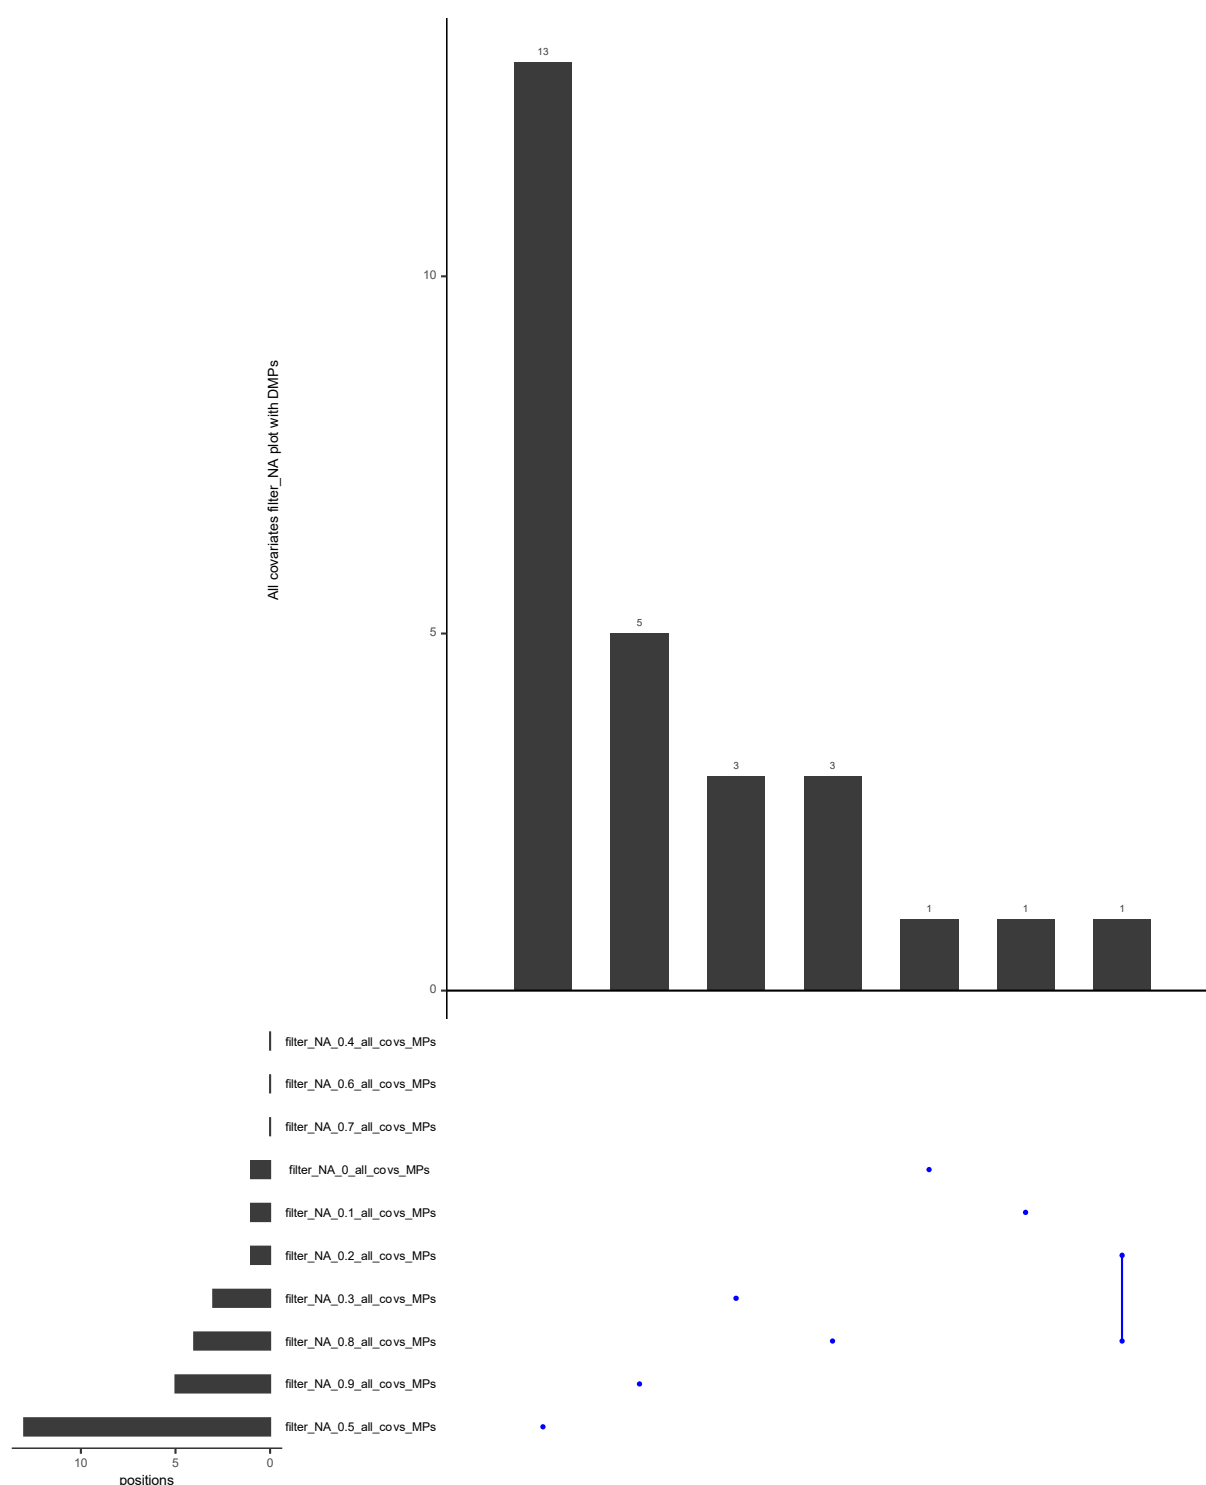

Figure S22: Intersection of outputs with different filter\_NA values for DMPs input using all covariates.

There is a single intersection with 0.2 and 0.8 filter\_NA values and the rest has unique outputs.

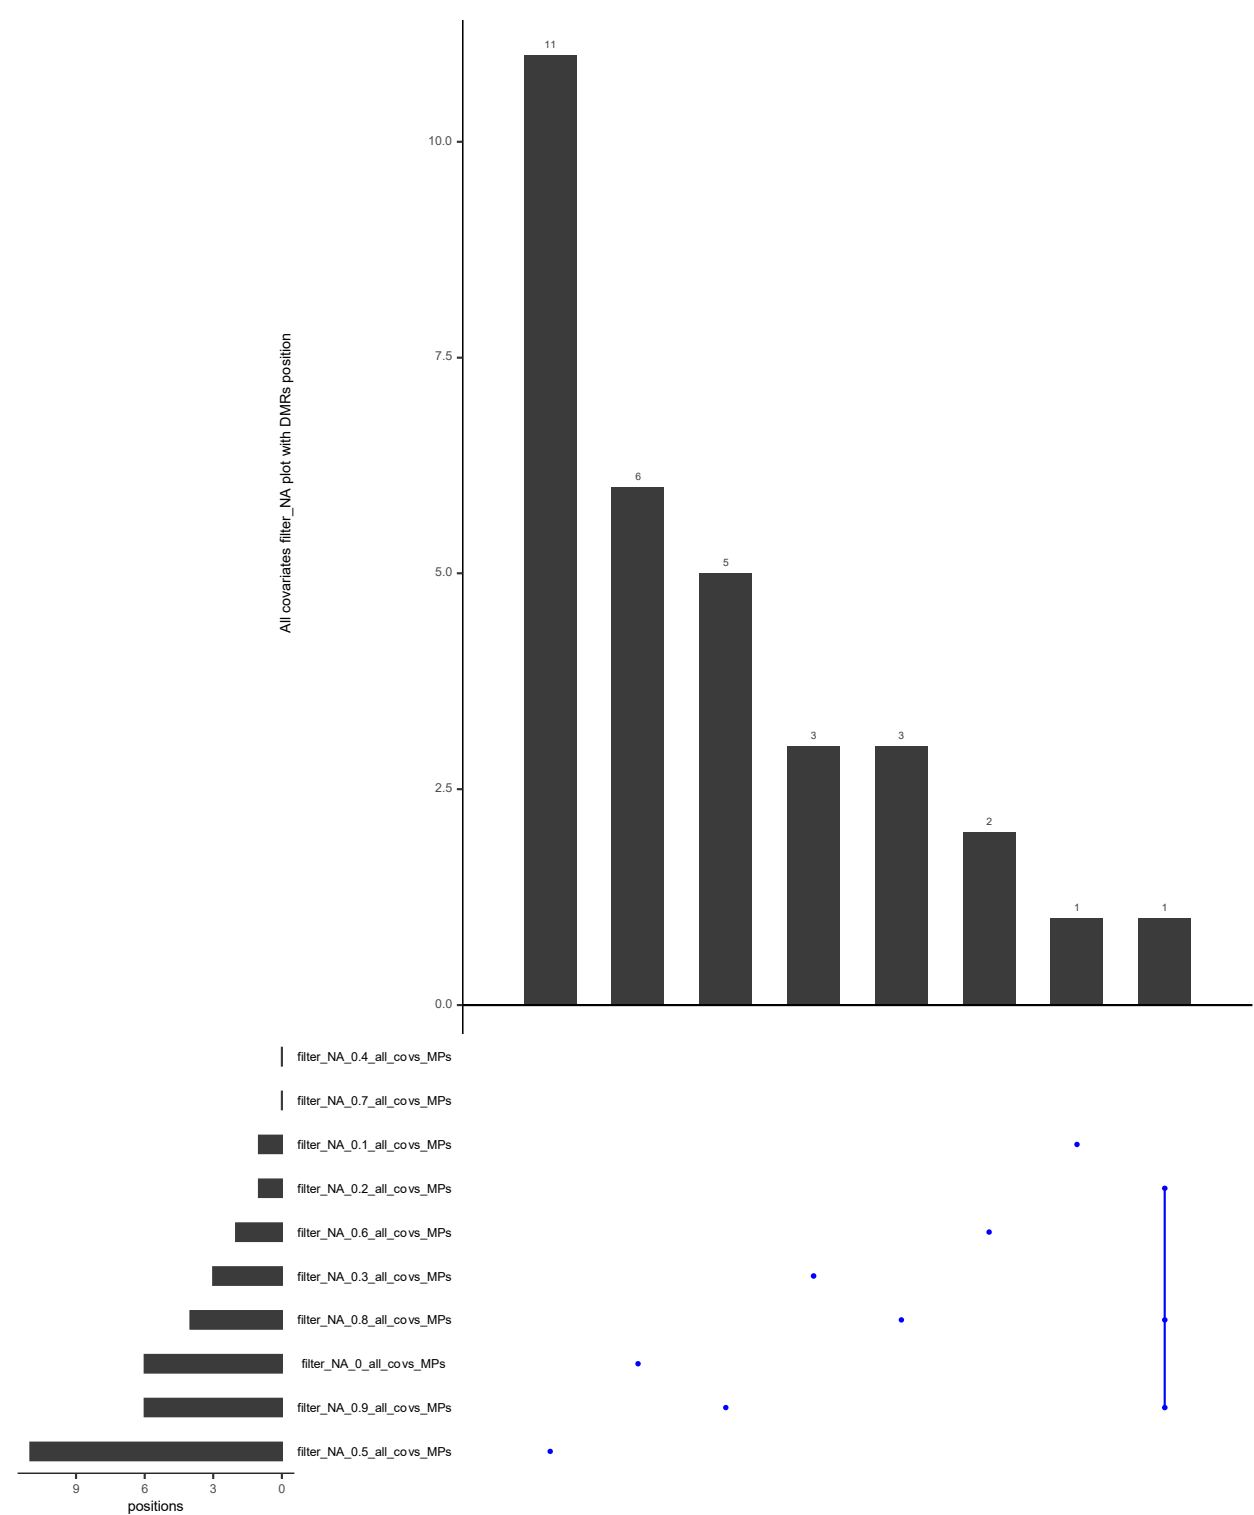

Figure S23: Intersection of outputs with different filter\_NA values for DMRs input using all covariates.

There is a single intersection with 0.2, 0.8, and 0.9 filter\_NA values, and the rest has unique outputs.

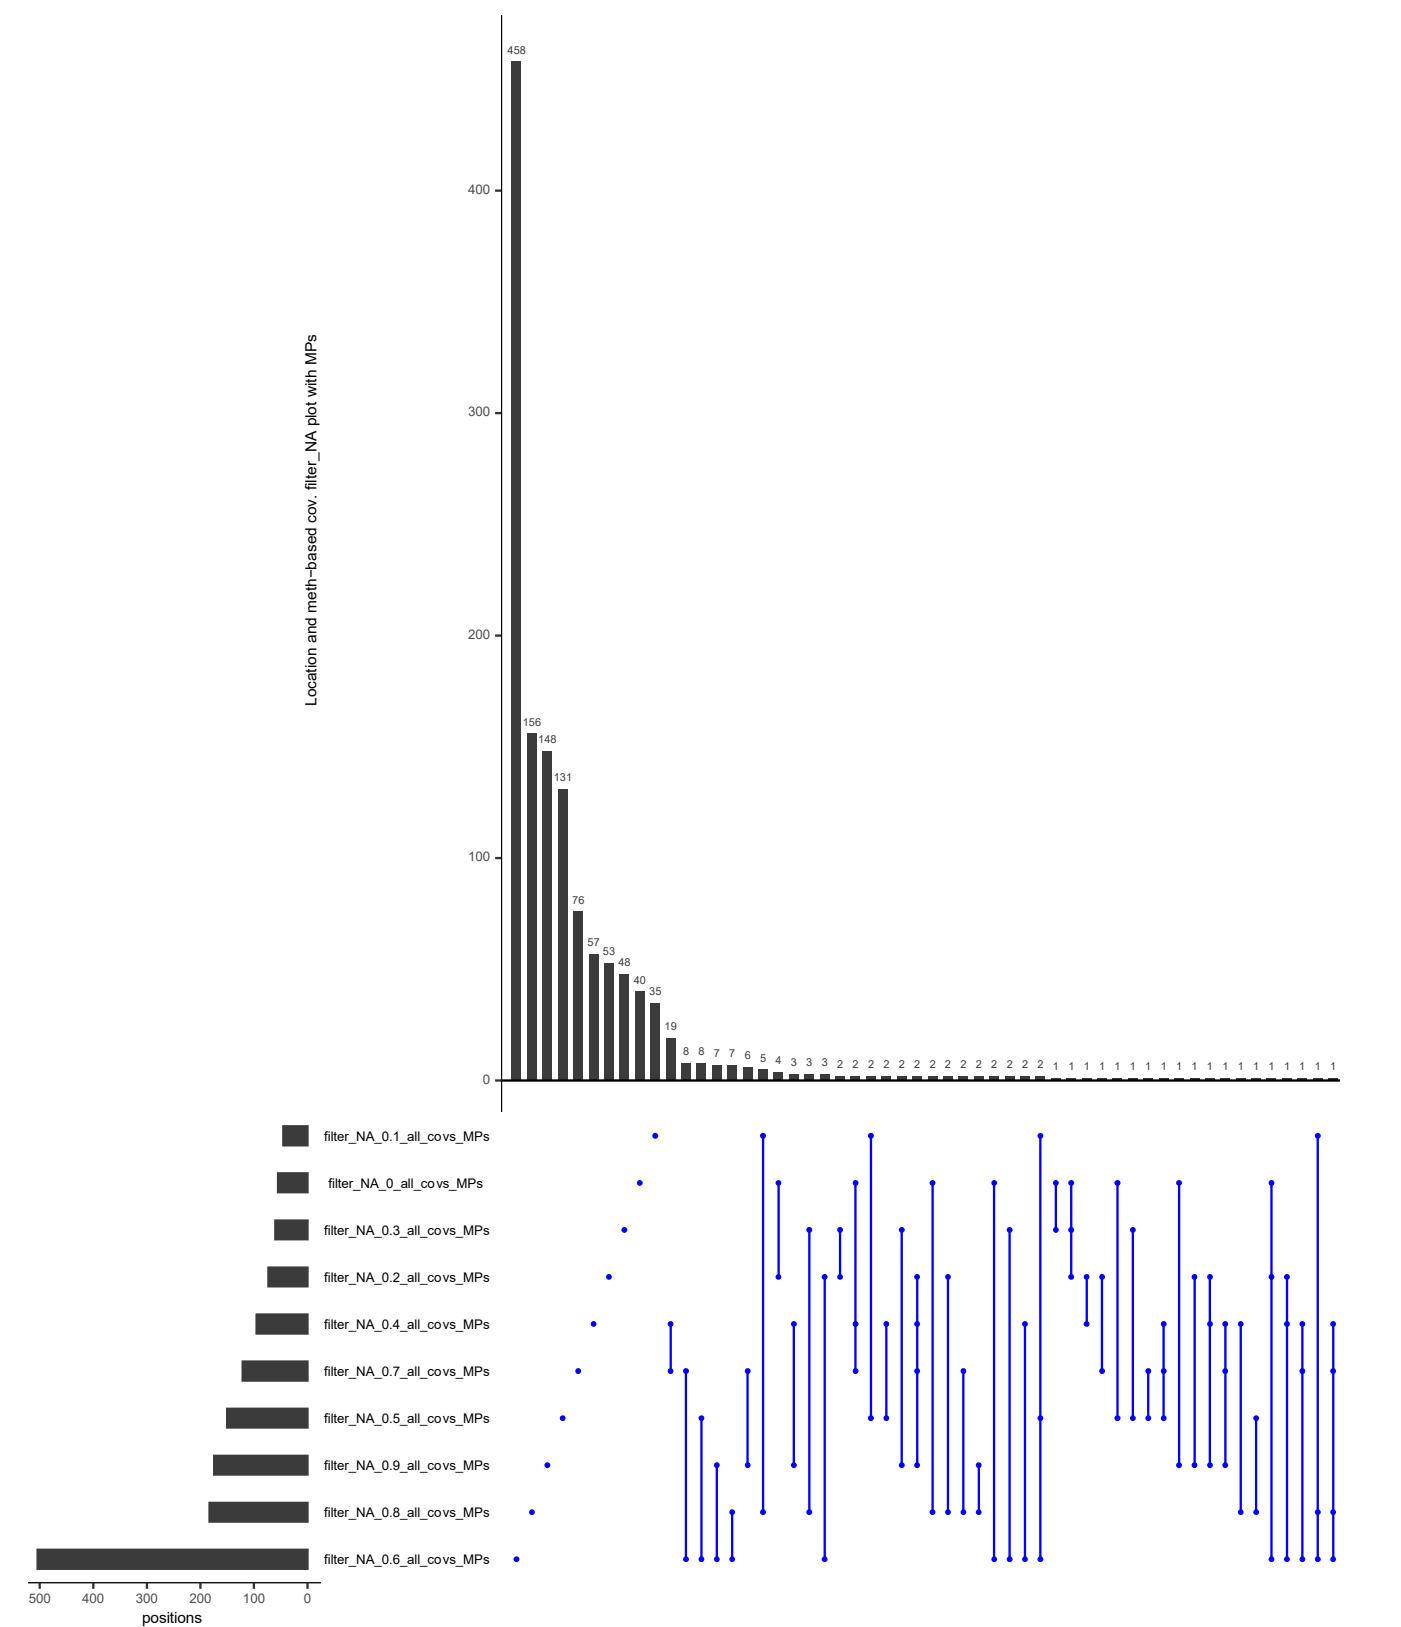

Figure S24: Intersection of outputs with different `filter_NA` values for MPs input using only location-methylation-based covariates.

The 0.4, 0.6, 0.8, and 0.8 `filter_NA` values have a shared gene, besides this, there are a lot of shared genes between outputs.

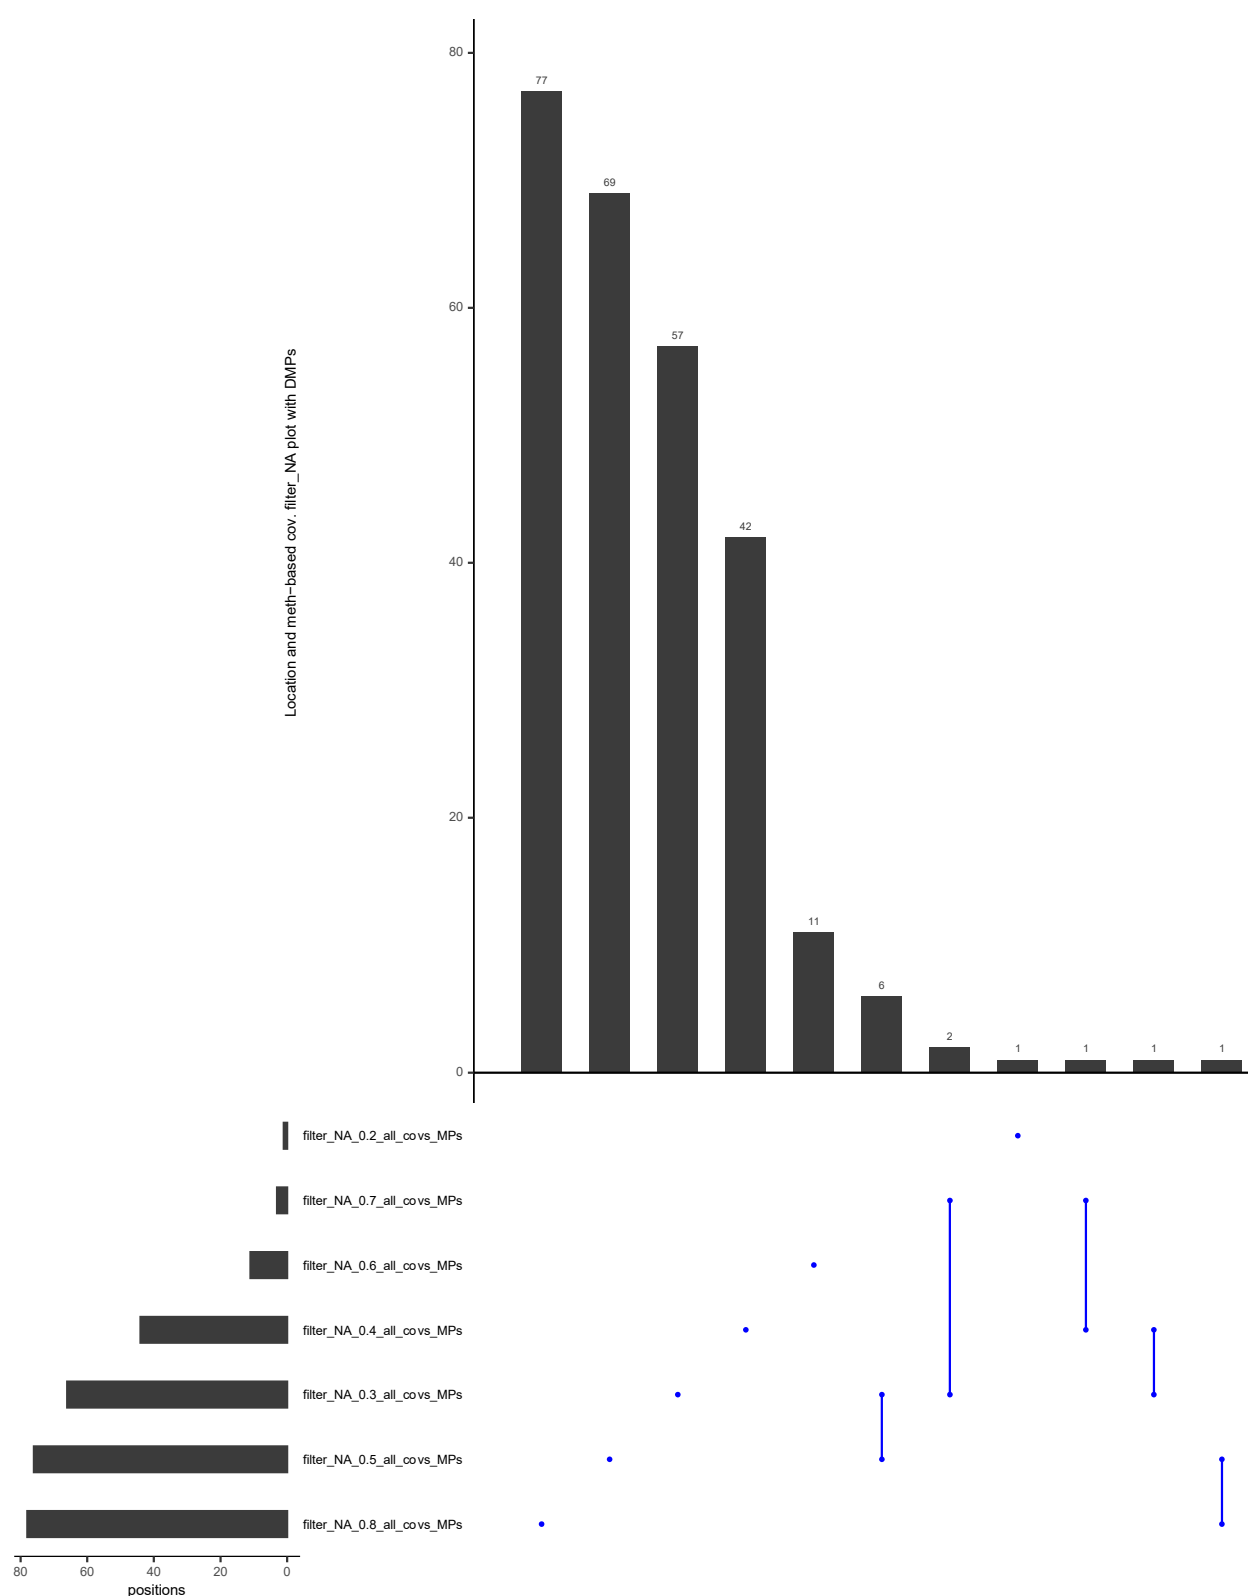

Figure S25: Intersection of outputs with different `filter_NA` values for DMPs input using only location-methylation-based covariates.

0.3 and 0.5 NA filtering outputs have the maximum number of common genes as six and 0.7 and 0.3 intersections follow it with two genes for DMPs input (upper right). A single gene is common between 0.7 & 0.4, 0.4 & 0.3 and 0.5 & 0.8.

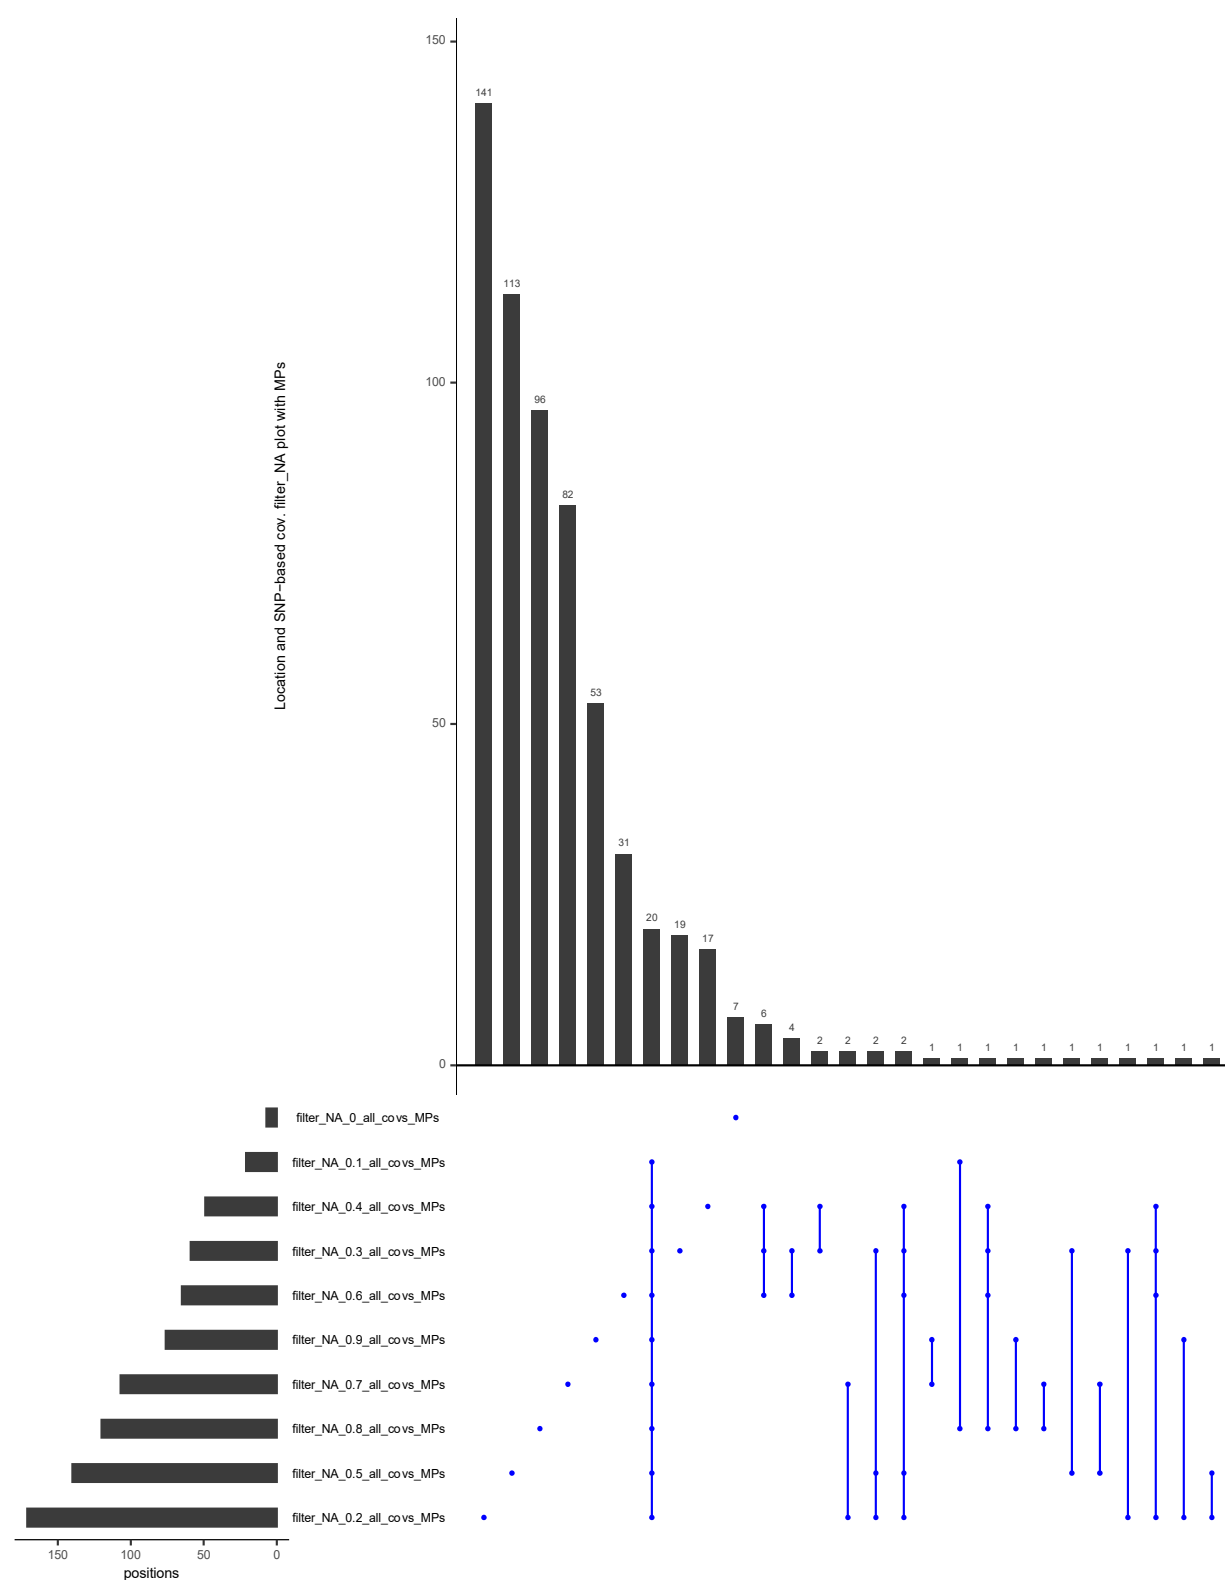

Figure S26: Intersection of outputs with different filter\_NA values for MPs input using only location-SNP-based covariates.

There are a lot of shared genes between outputs. 20 elements are shared between all groups but 0 filter\_NA.

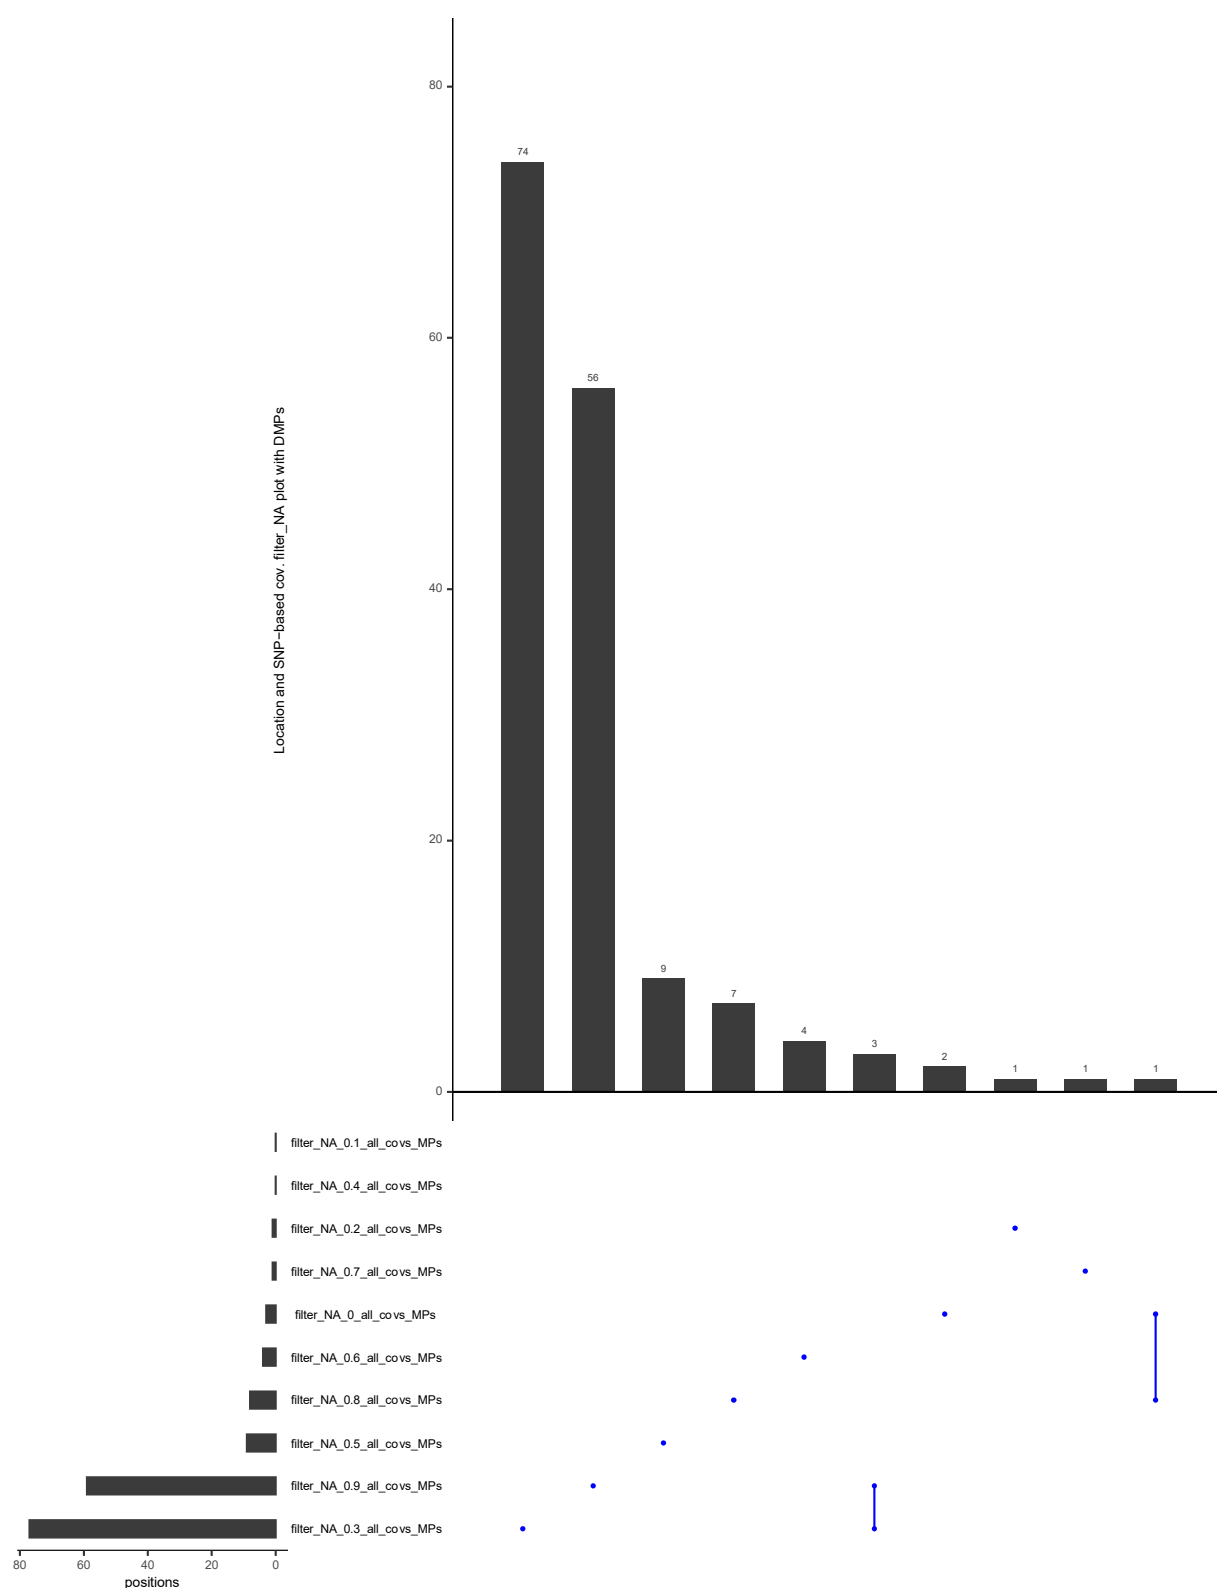

Figure 27: Intersection of outputs with different filter\_NA values for DMPs input using only location-SNP-based covariates.

0 and 0.8 NA & 0.9 and 0.3 filtering outputs share a one and three gene(s) in common.

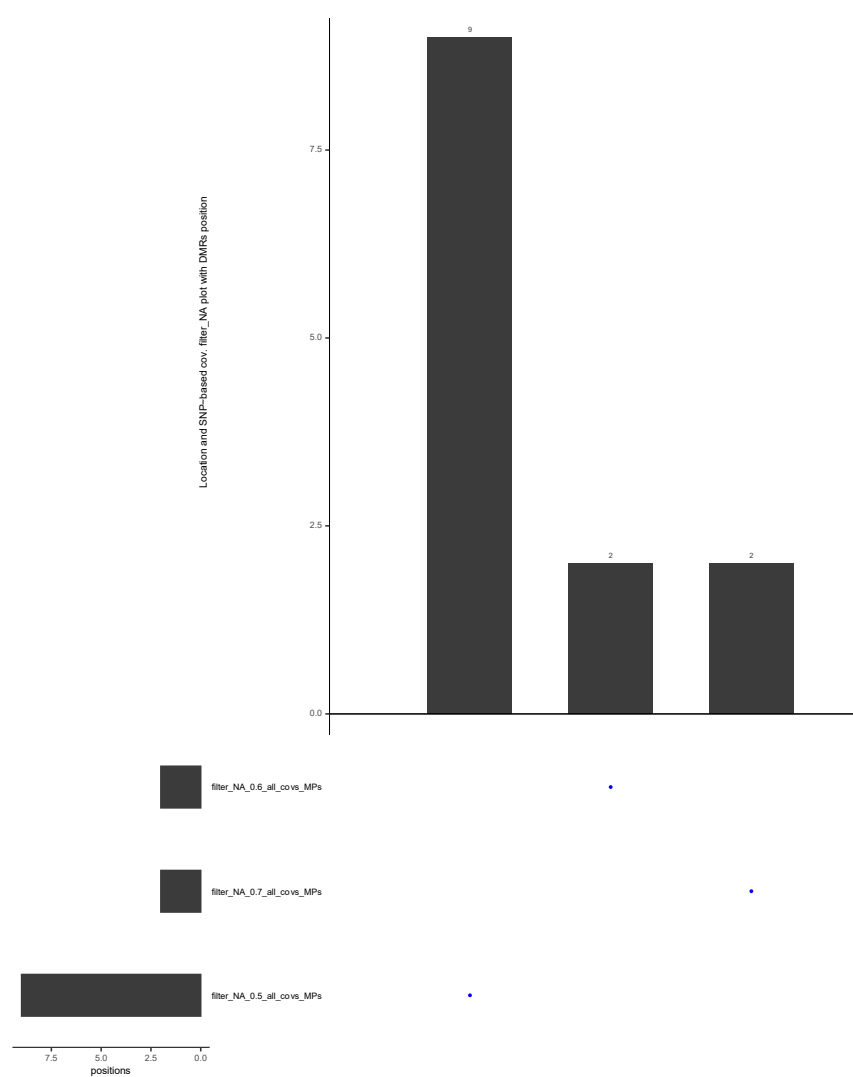

Figure S28: **Intersection of outputs with different filter\_NA values for DMRs input using only location-SNP-based covariates.**

Nothing is shared between outputs.

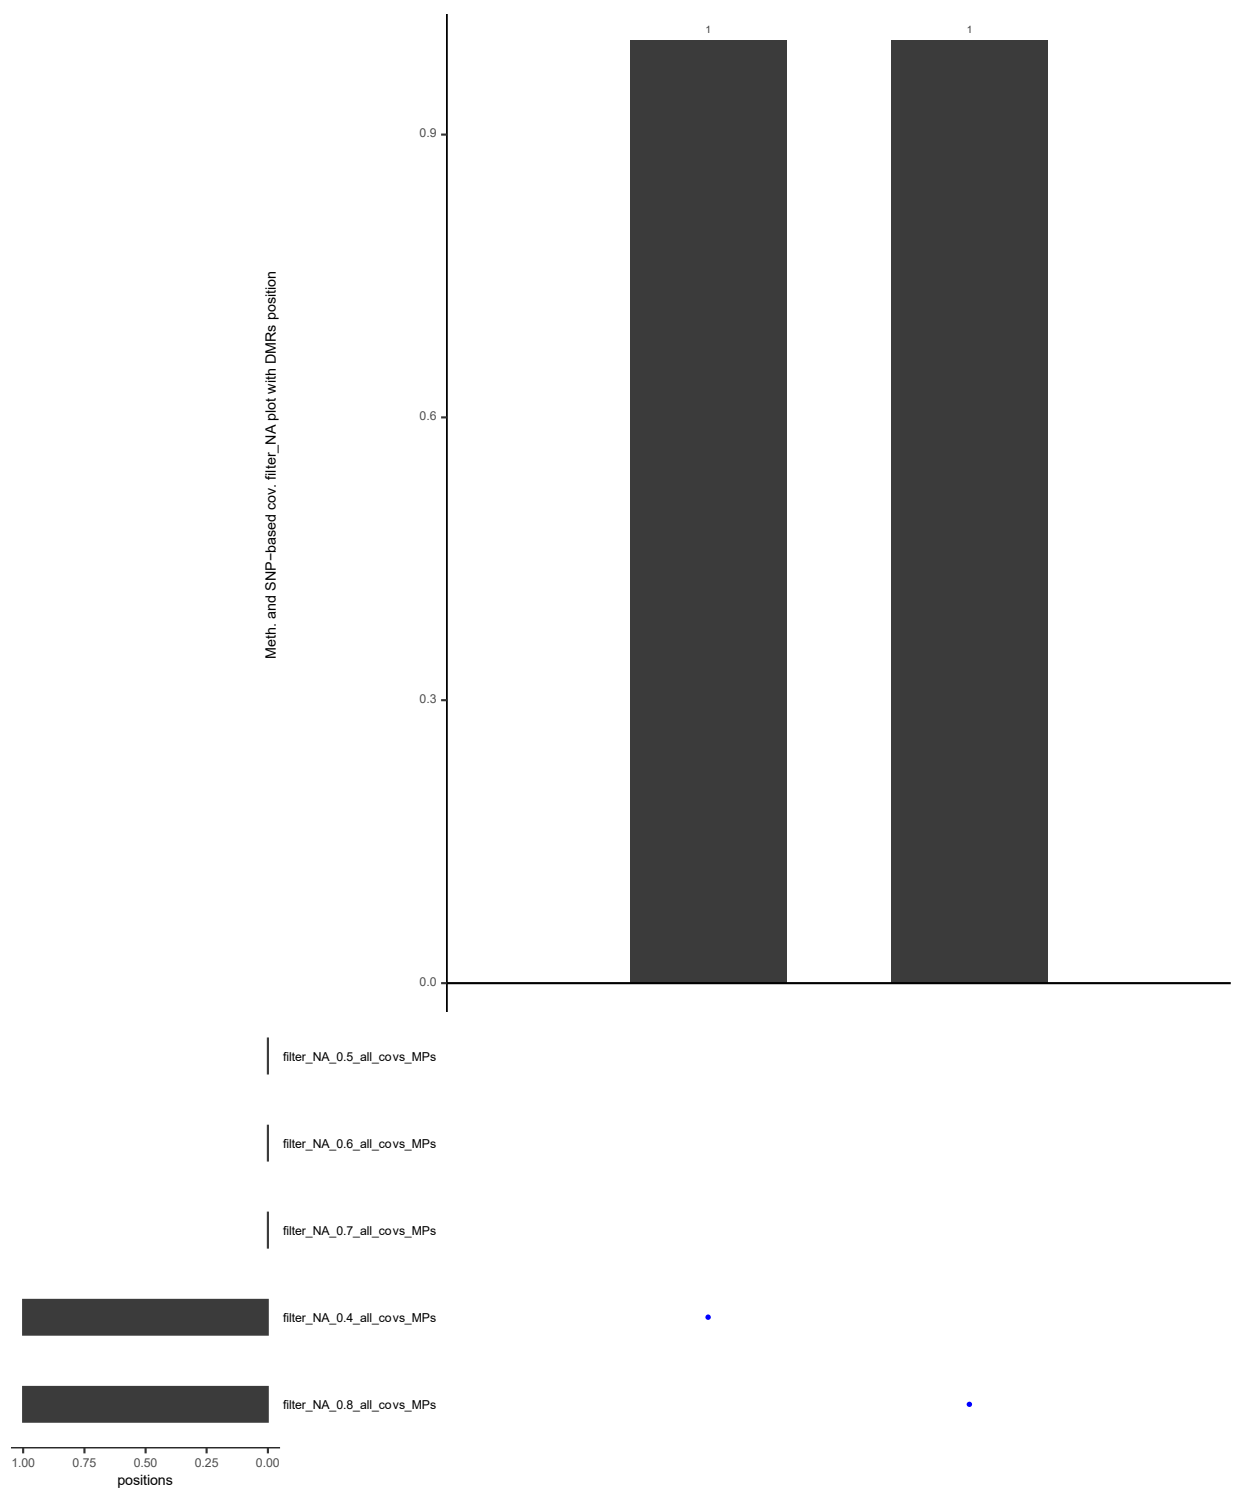

Figure S29: Intersection of outputs with different filter\_NA values for MPs input using only SNP-methylation-based covariates.

Nothing is shared between outputs.

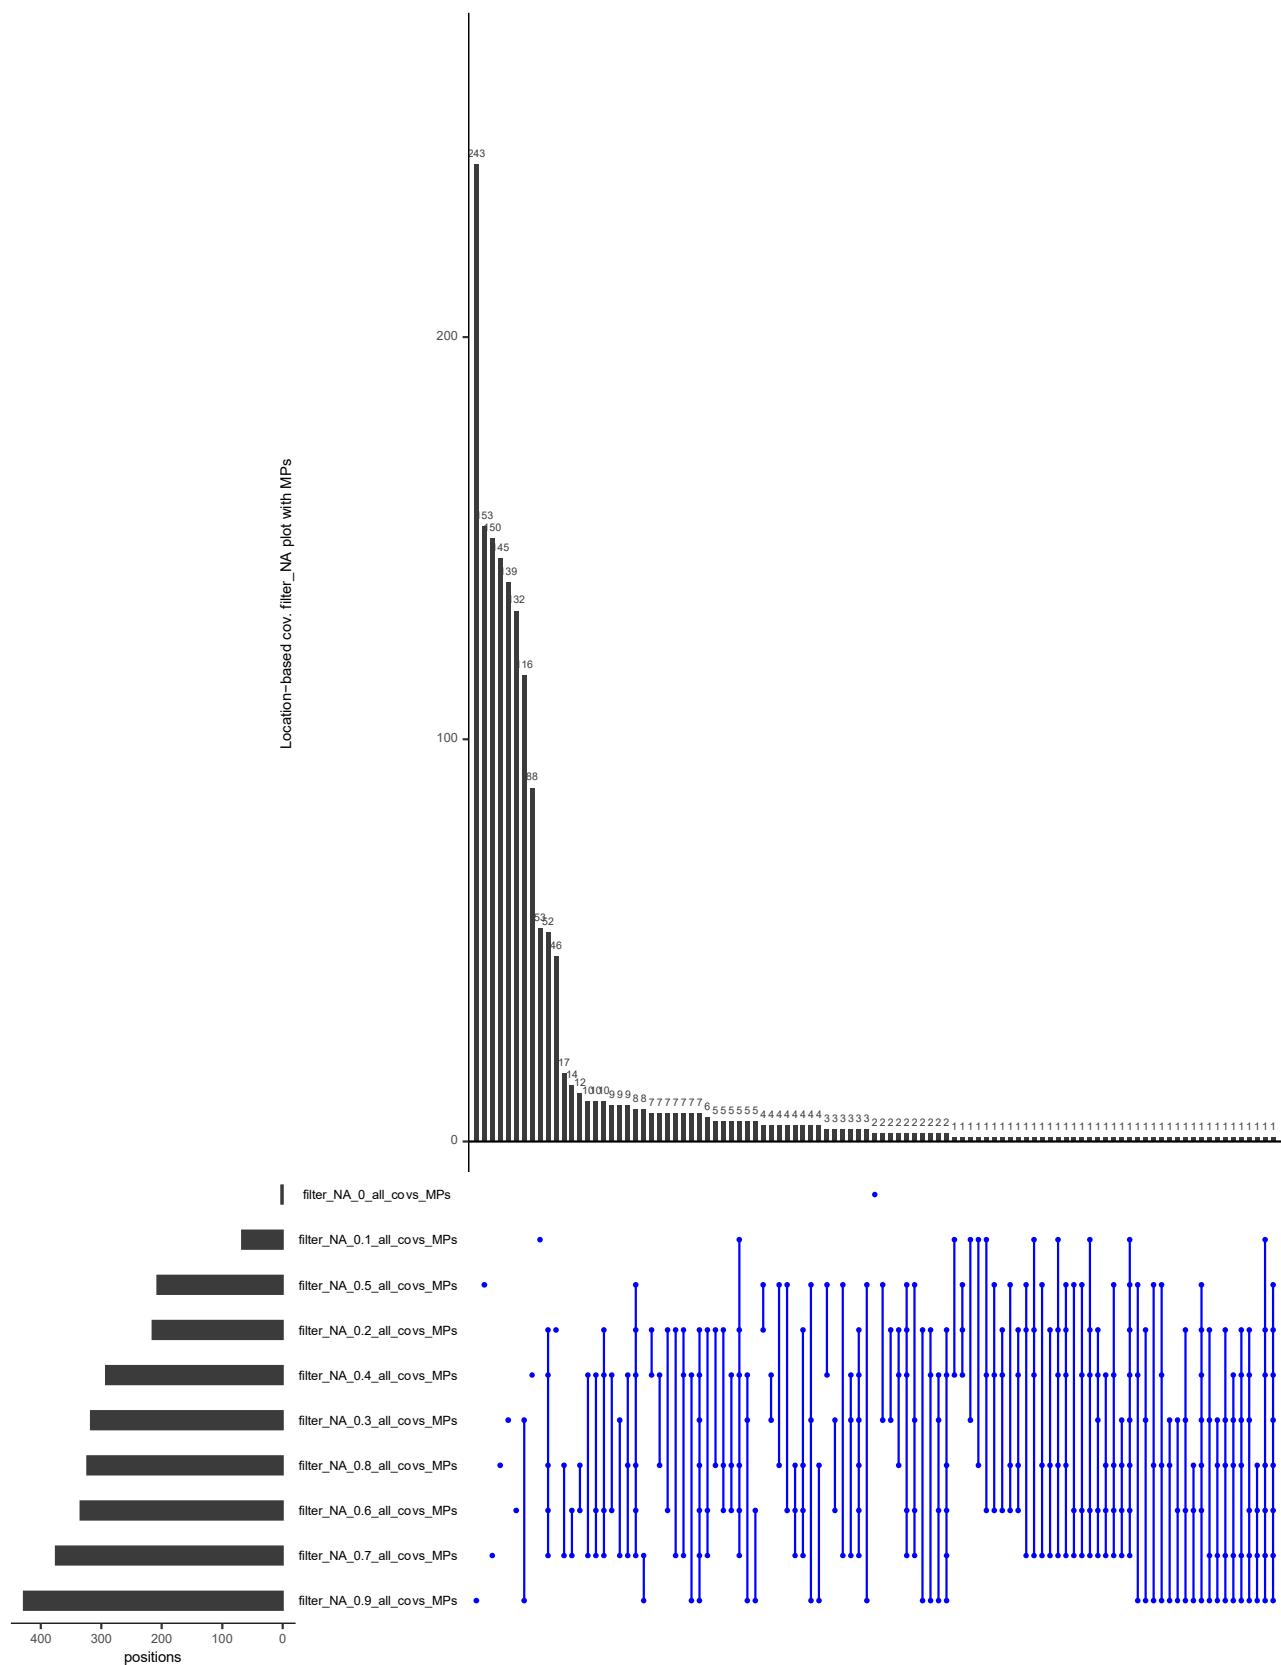

Figure 30: Intersection of outputs with different filter\_NA values for MPs input using only location-based covariates.

This input has the maximum number of shared elements.

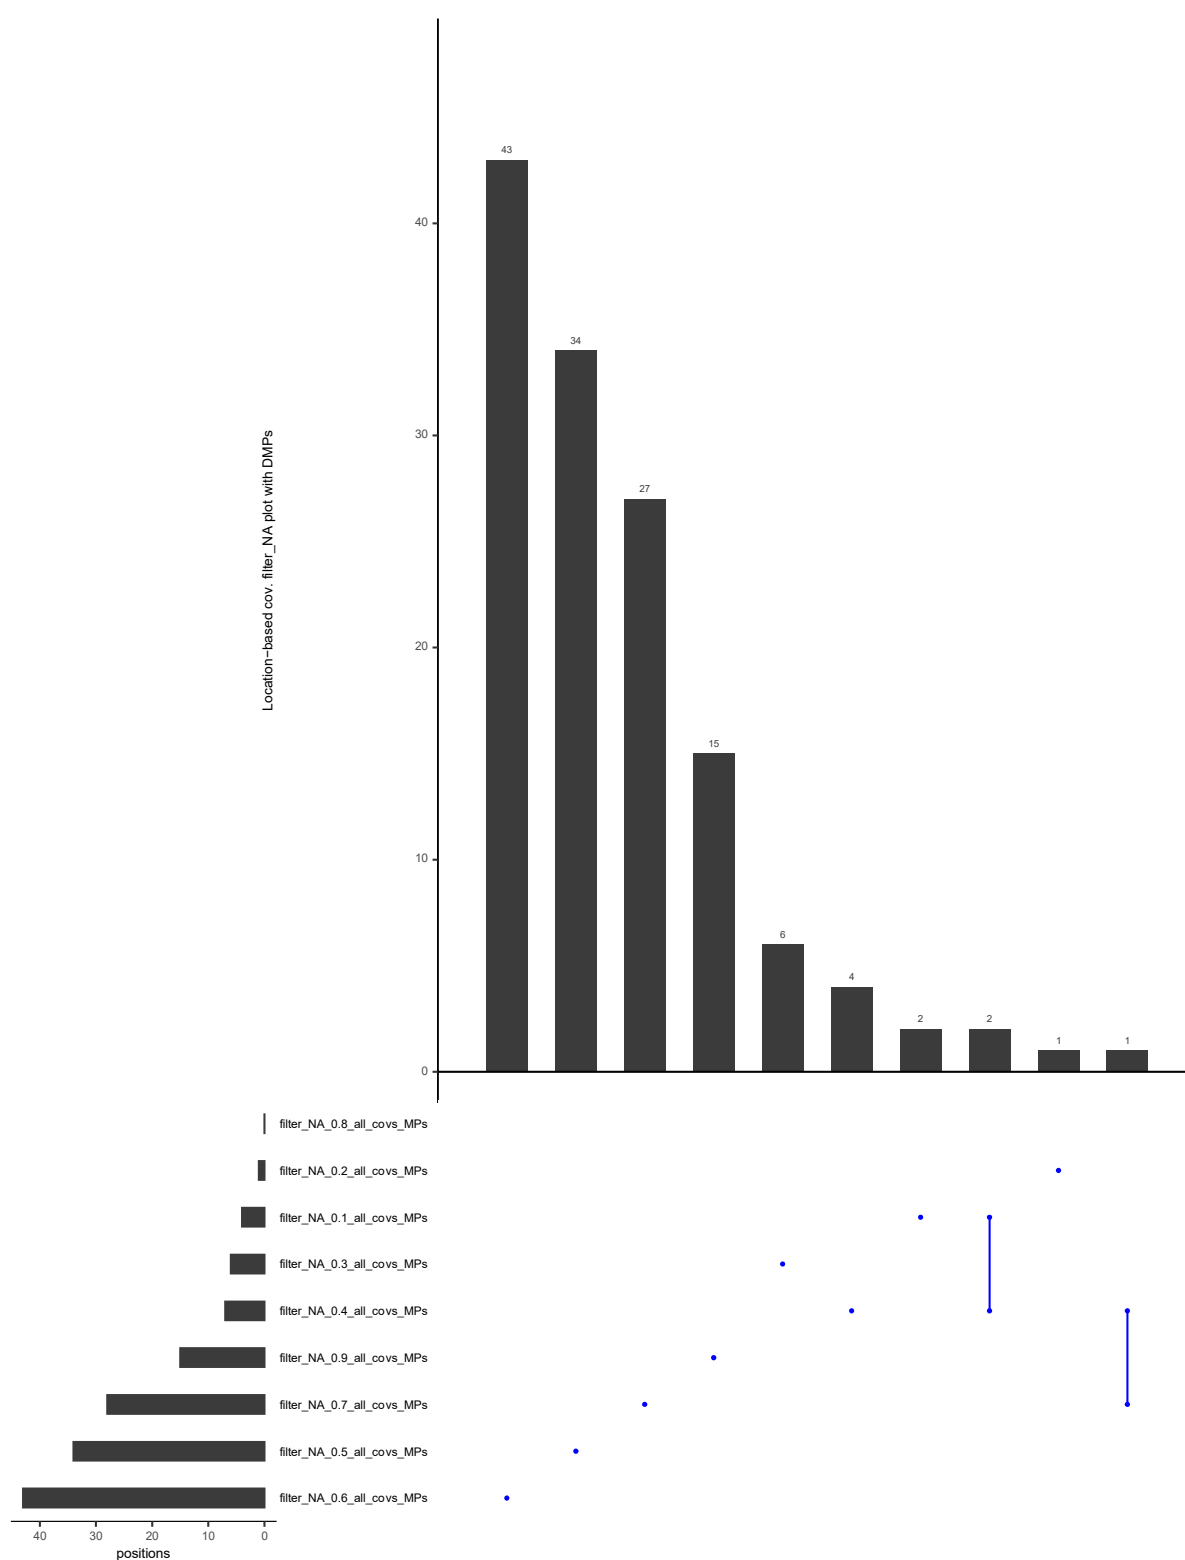

Figure 31: Intersection of outputs with different filter\_NA values for DMPs input using only location-based covariates.

This input showed a single gene in common between 0.1 & 0.4 and 0.4 & 0.7 filters.

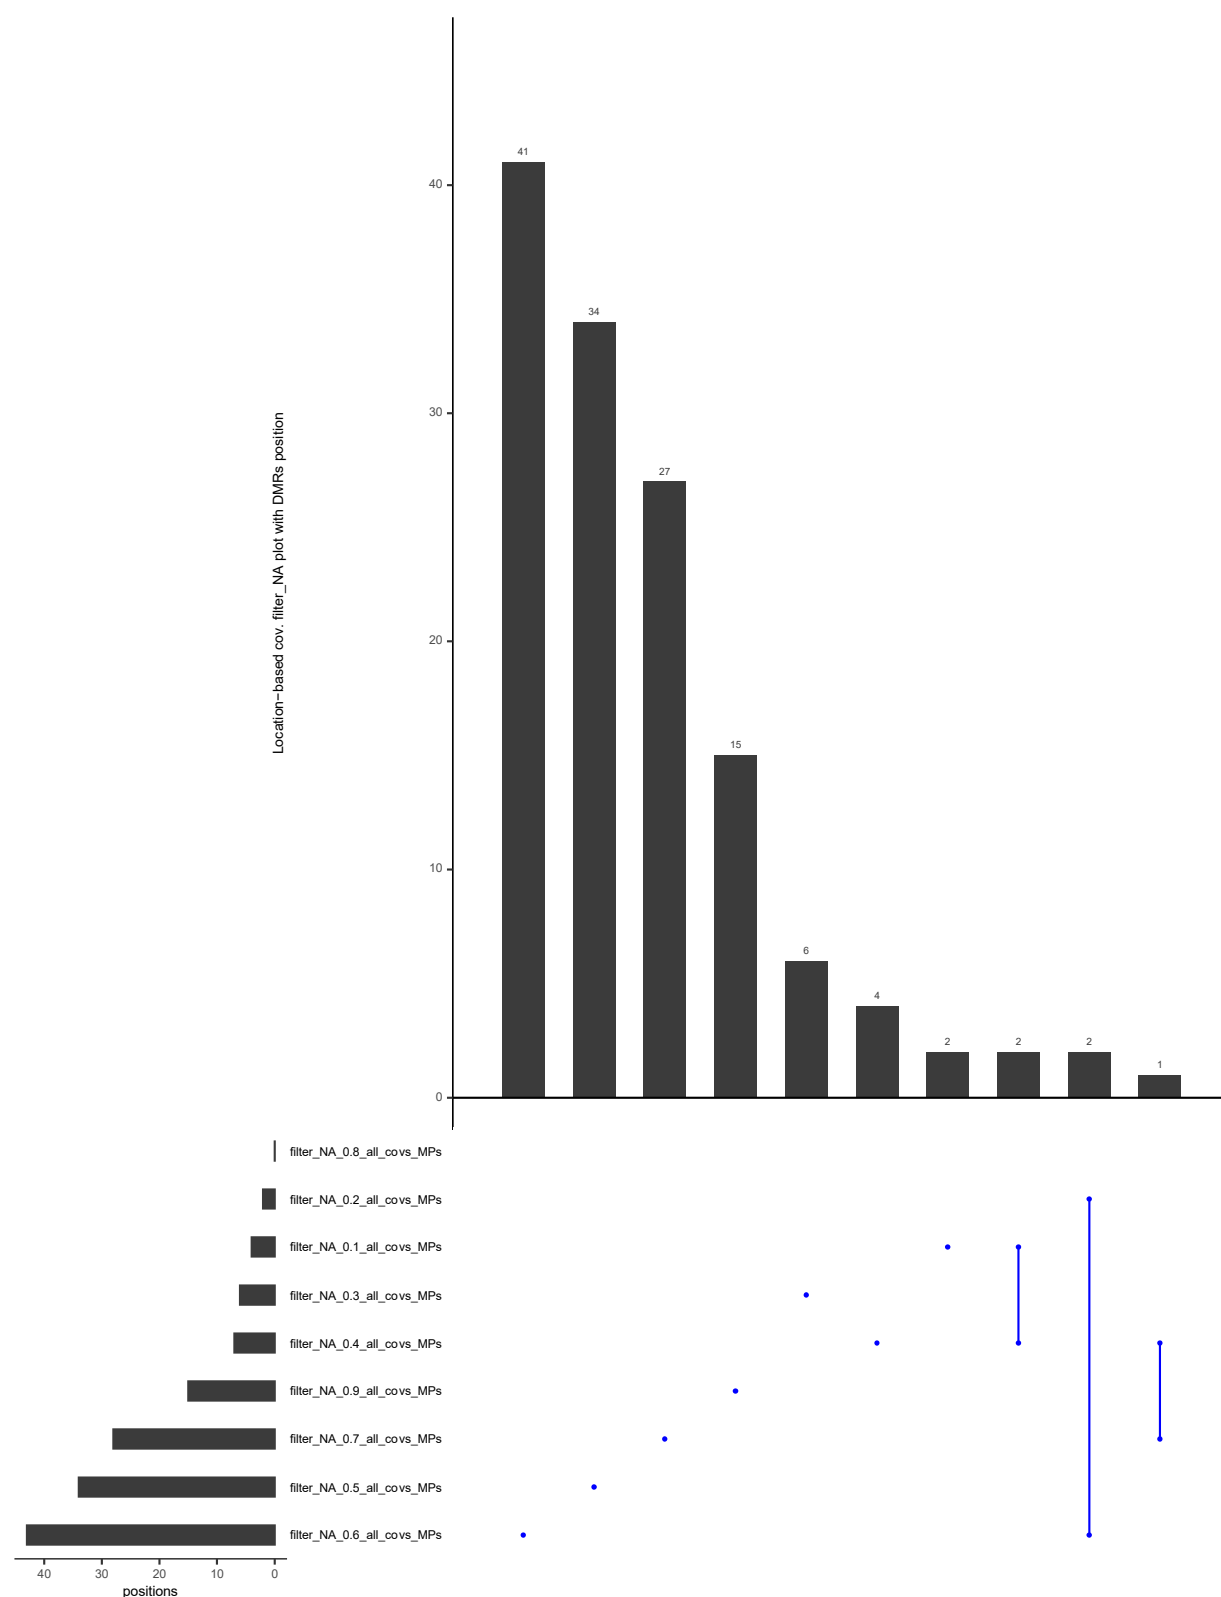

Figure S32: Intersection of outputs with different `filter_NA` values for DMRs input using only location-based covariates.

This input showed an intersection between 0.1 & 0.4 and 0.2 & 0.5 `filter_NA`'s with two genes, 0.4 & 0.7 `filter_NA` with a single gene in common.

### Removal of genetic variants that might be interpreted as significant epigenetic marks

Consider a SNP that will change a CG to a GG –methylation of the position will not be possible anymore and it might appear as a significant position in EWAS. If it's a homozygous SNP, then there will be a C in the reference genome and all Gs in the alignments (or Cs on Crick strand) so it will just be interpreted as a normal SNP by a haplotype-based variant detector. If it's a heterozygous SNP, then on the crick strand everything is read as normal FreeBayes [6], but the Cs on the Watson strand will likely be converted to Ts by the bisulfite treatment and these will be ignored. The Gs on Watson will be interpreted normally so as the result it will look like a heterozygous CG to GG SNP.

Such sites that might lead to a loss or gain of a methylation site based on genetic divergence can be investigated by intersecting the Emodel results with either Gmodel and/or GxE. If there are SNPs that will lead to a context change, intersecting the model outputs solves this issue. In the case of a homozygous SNP, there will be a C in the reference and Gs in the alignments (or Cs on the Crick strand), so the position will be interpreted as a normal SNP by a variant calling software, FreeBayes. In the case of a heterozygous SNP, the crick strand is read as normal by FreeBayes, but the Cs on the Watson strand will likely be converted to Ts by the bisulfite treatment, and these will be ignored. The Gs on Watson will be interpreted normally. This case will be interpreted as a heterozygous C > G SNP by the bisulfite aware variant callers such as the EpiDiverse SNP pipeline and solved. We were looking into this in detail in an example by checking CG sites shared by all models.

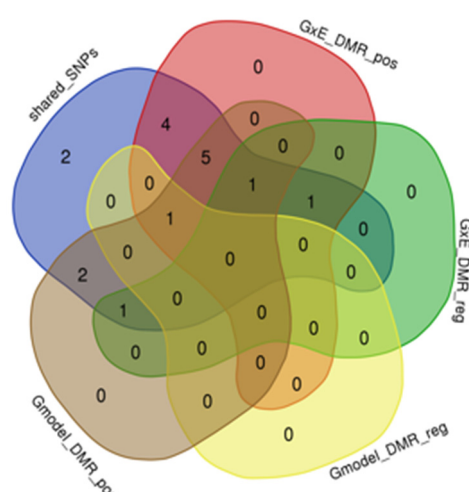

Figure S33: Intersection of shared SNPs and significant common markers between G and GxE models.

Only a single position is shared between Emodel MP & DMP inputs and G & GxE models DMPs input. The number of SNPs correlated with that shared positions is 1, 16, for G and GxE models respectively.

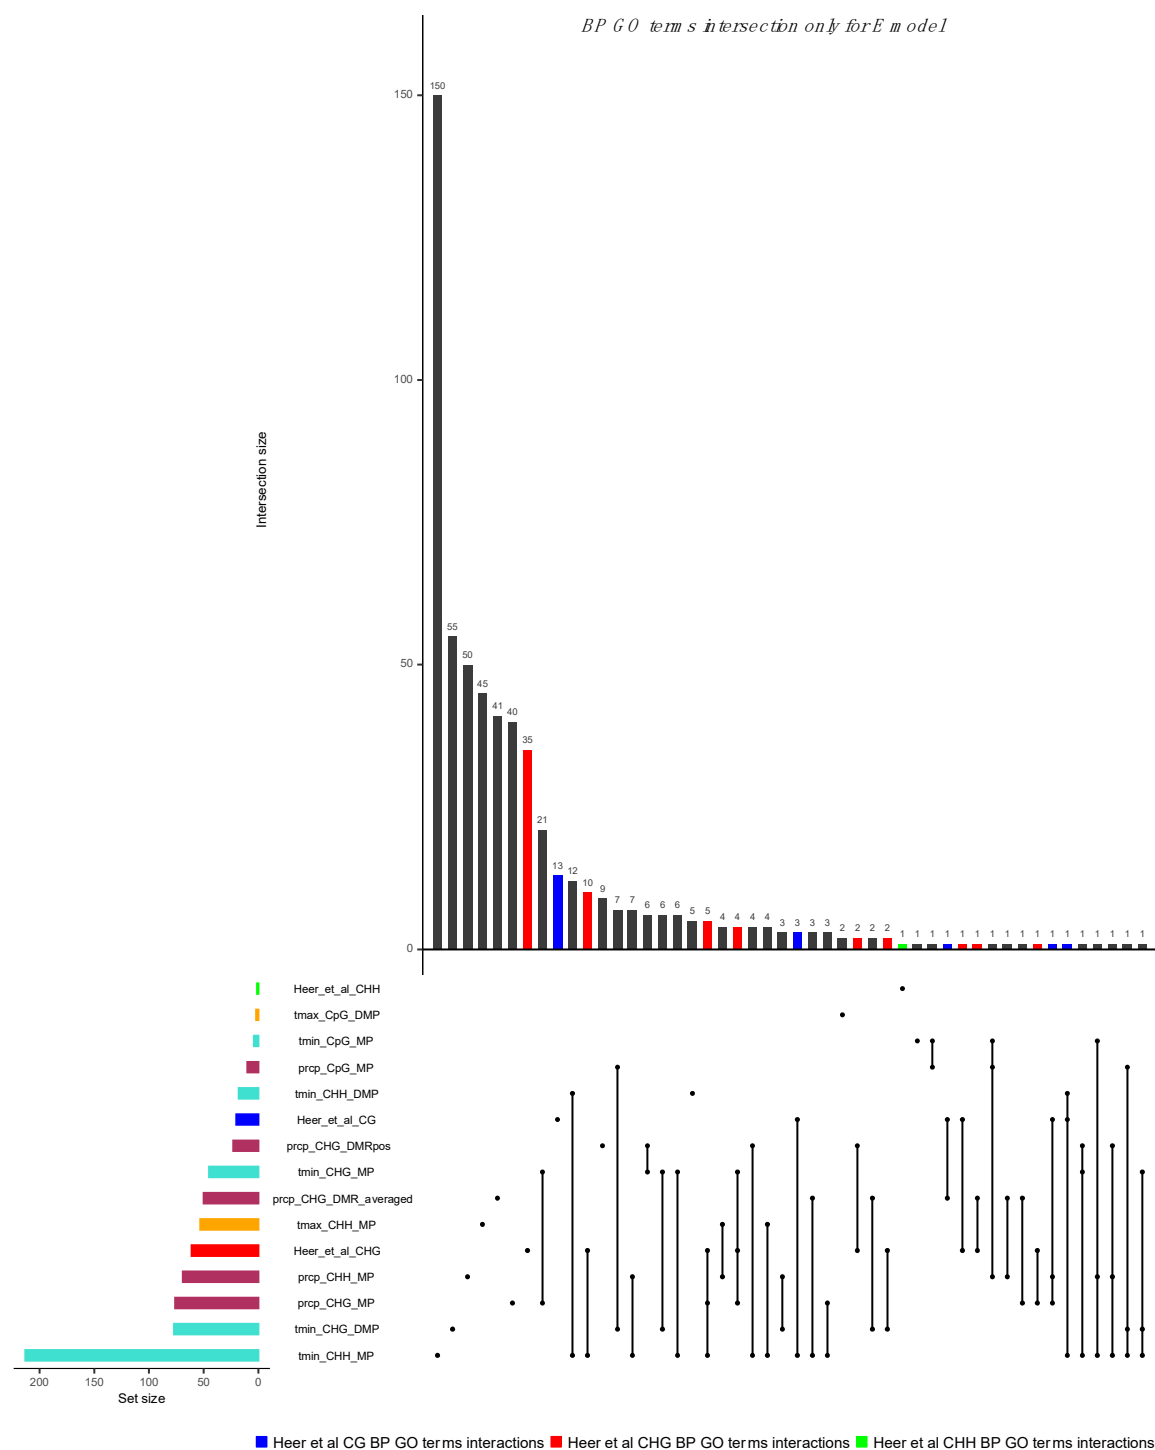

Figure S34: Intersection of significant BP GO terms between location-based Emodel output and a previous study [7] with UpSetR package [8].

Common BP GO terms are connected via vertical lines. No output could be derived with SNP and methylation-based clustering, therefore only results of location-based clustering are shown. Bars are ordered from smallest to largest by sample size. The maximum and the minimum number of unique elements belong to the tmin\_CHH\_MP and tmax\_CG\_DMP inputs, with 150 and one elements respectively. 47%, 45%, and 0% of BP GO terms are shared with Heer et al., 2016 study for CG the (blue), CHG (red), and CHH (green) contexts. Tmin, prcp, and tmax sets are colored as turquoise, maroon, and orange.

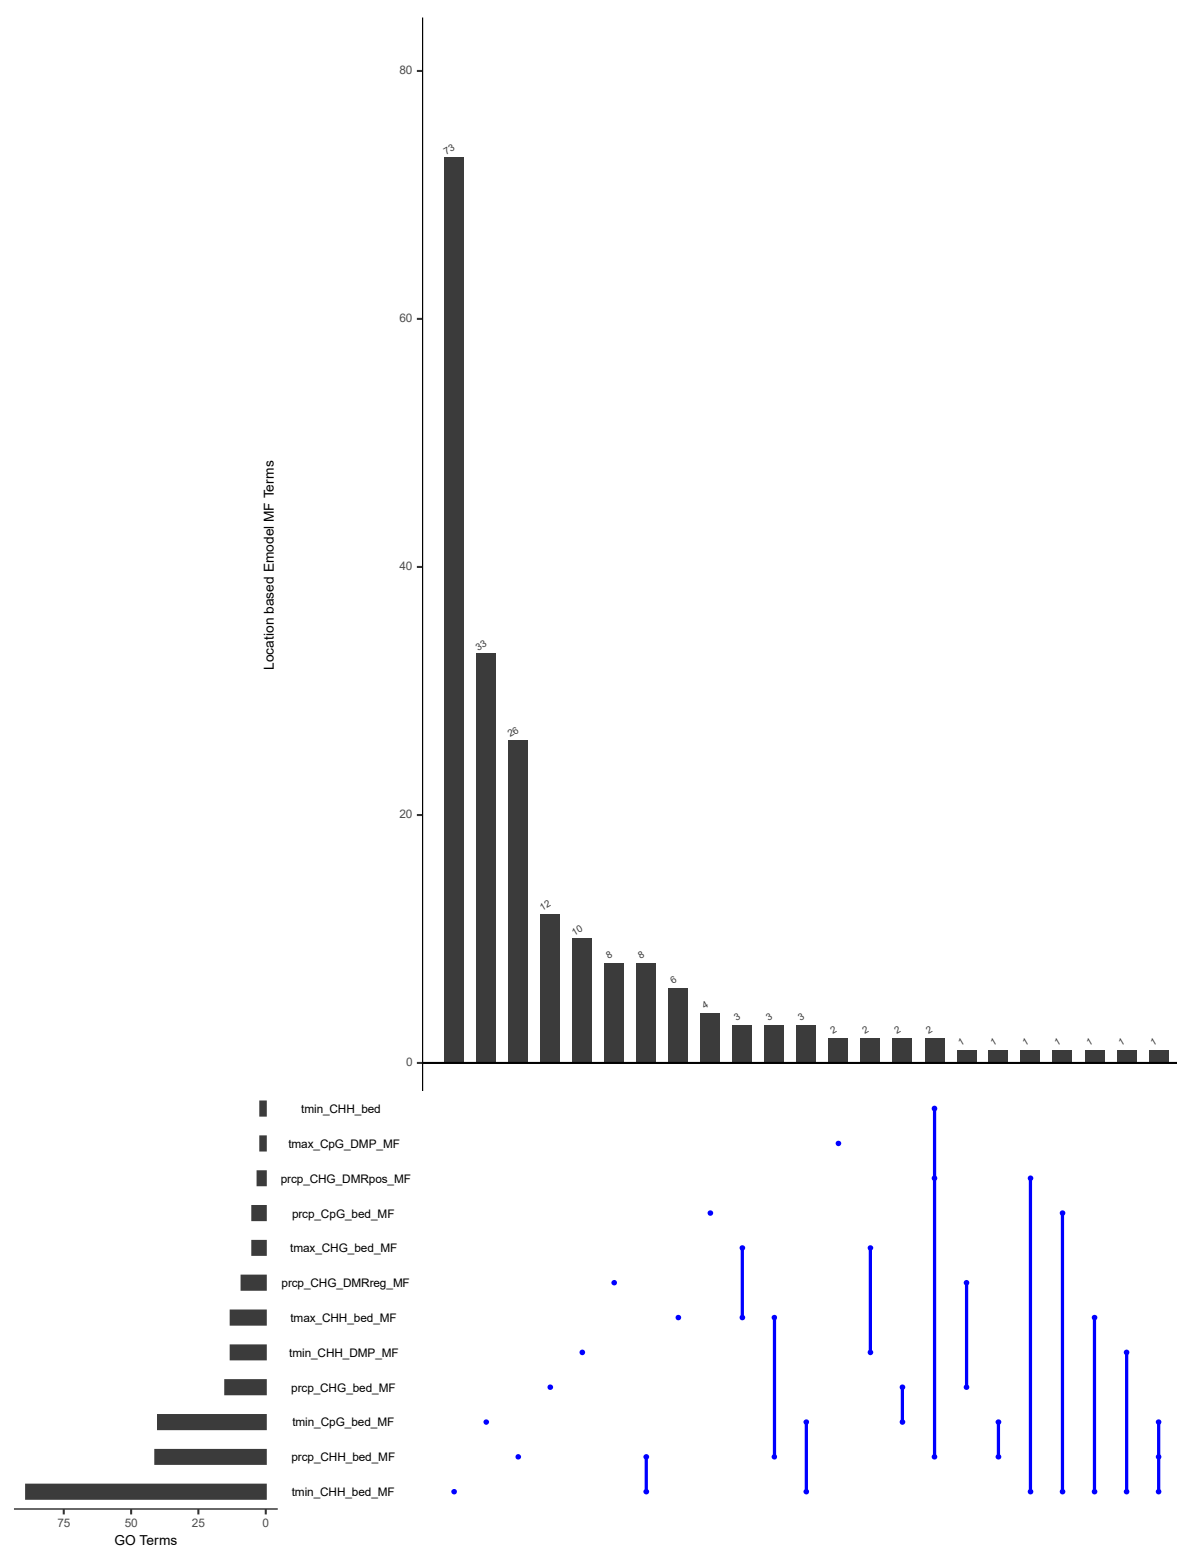

Figure S35: Intersection of significant MF GO terms between location-based Emodel output and a previous study [7] with Up-setR package [8].

Three terms are shared by three groups, 27 terms are shared by two groups and 174 terms are uniquely shared by single inputs. The highest number of elements belongs to CHH tmin MP input with 73 terms and the lowest is with two terms for the CG tmax DMP input. 15% of terms are shared by inputs and 85% is unique to single inputs.

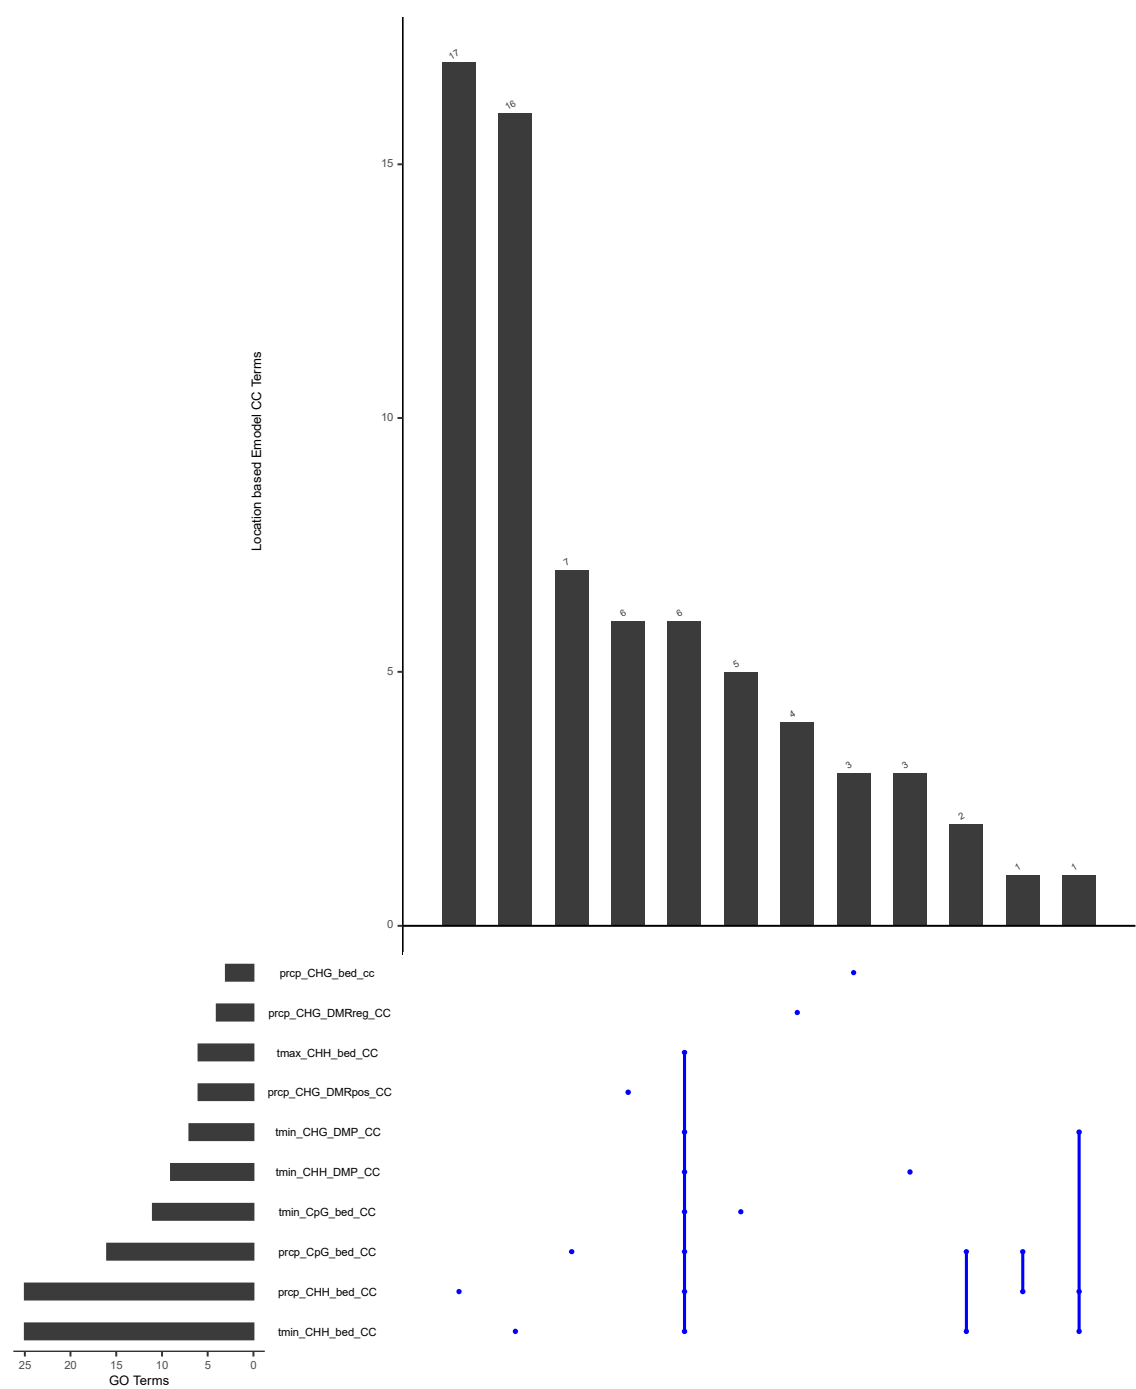

Figure S36: Intersection of significant CC GO terms between location-based Emodel output and a previous study [7] with Up-setR package [8].

Six terms are shared by seven groups, one term is shared by three groups, three terms are shared by two groups and 61 terms are uniquely shared by single inputs. The highest number of elements belongs to CHH prcp MP input with 17 terms and the lowest is with three terms for the CHH tmin DMP input. 15% of terms are shared by inputs and 85% is unique to single inputs.

|                                            | Emodel    |           |           |           |          |          |          |           |           |           |           |           |
|--------------------------------------------|-----------|-----------|-----------|-----------|----------|----------|----------|-----------|-----------|-----------|-----------|-----------|
|                                            | prcp_CHH_ | tmin_CHH_ | tmin_CHH_ | tmax_CHH_ | tmin_CG_ | prcp_CG_ | tmax_CG_ | tmin_CHG_ | tmin_CHG_ | prcp_CHG_ | prcp_CHG_ | prcp_CHG_ |
|                                            | MPs       | MPs       | DMPs      | MPs       | MPs      | MPs      | DMPs     | DMPs      | MPs       | DMRs      | DMRs avg  | MPs       |
| found per input and context                | 5         | 14        | 0         | 1         | 2        | 2        | 0        | 2         | 3         | 2         | 0         | 4         |
| terms shared by a maximum amount of inputs | 2         | 6         | 0         | 0         | 2        | 2        | 0        | 2         | 1         | 2         | 0         | 1         |
| found per input                            | MPs       | 26        | DMPs      | 2         | DMRs     | 2        | avg.     | 0         |           |           |           |           |
| found per context                          | CG        | 4         | CHG       | 11        | CHH      | 20       |          |           |           |           |           |           |
| found per climatic data                    | prcp      | 8         | tmin      | 21        | tmax     | 1        |          |           |           |           |           |           |

Figure 37: Highlighted GO terms based on Emodel.

Terms comprising “water”, “shoot”, “root”, and “defense” are highlighted for all inputs and contexts. Tmin\_CHH\_MP yields the largest number of terms, while tmin\_CHH\_DMPs, tmax\_CG\_DMPs, and prcp CHG\_DMRs averaged do not lead to any terms. MPs, CHH, and tmin yield the highest numbers of terms per input, context, and climatic data, respectively. Cells are colored from green = high to red = low.

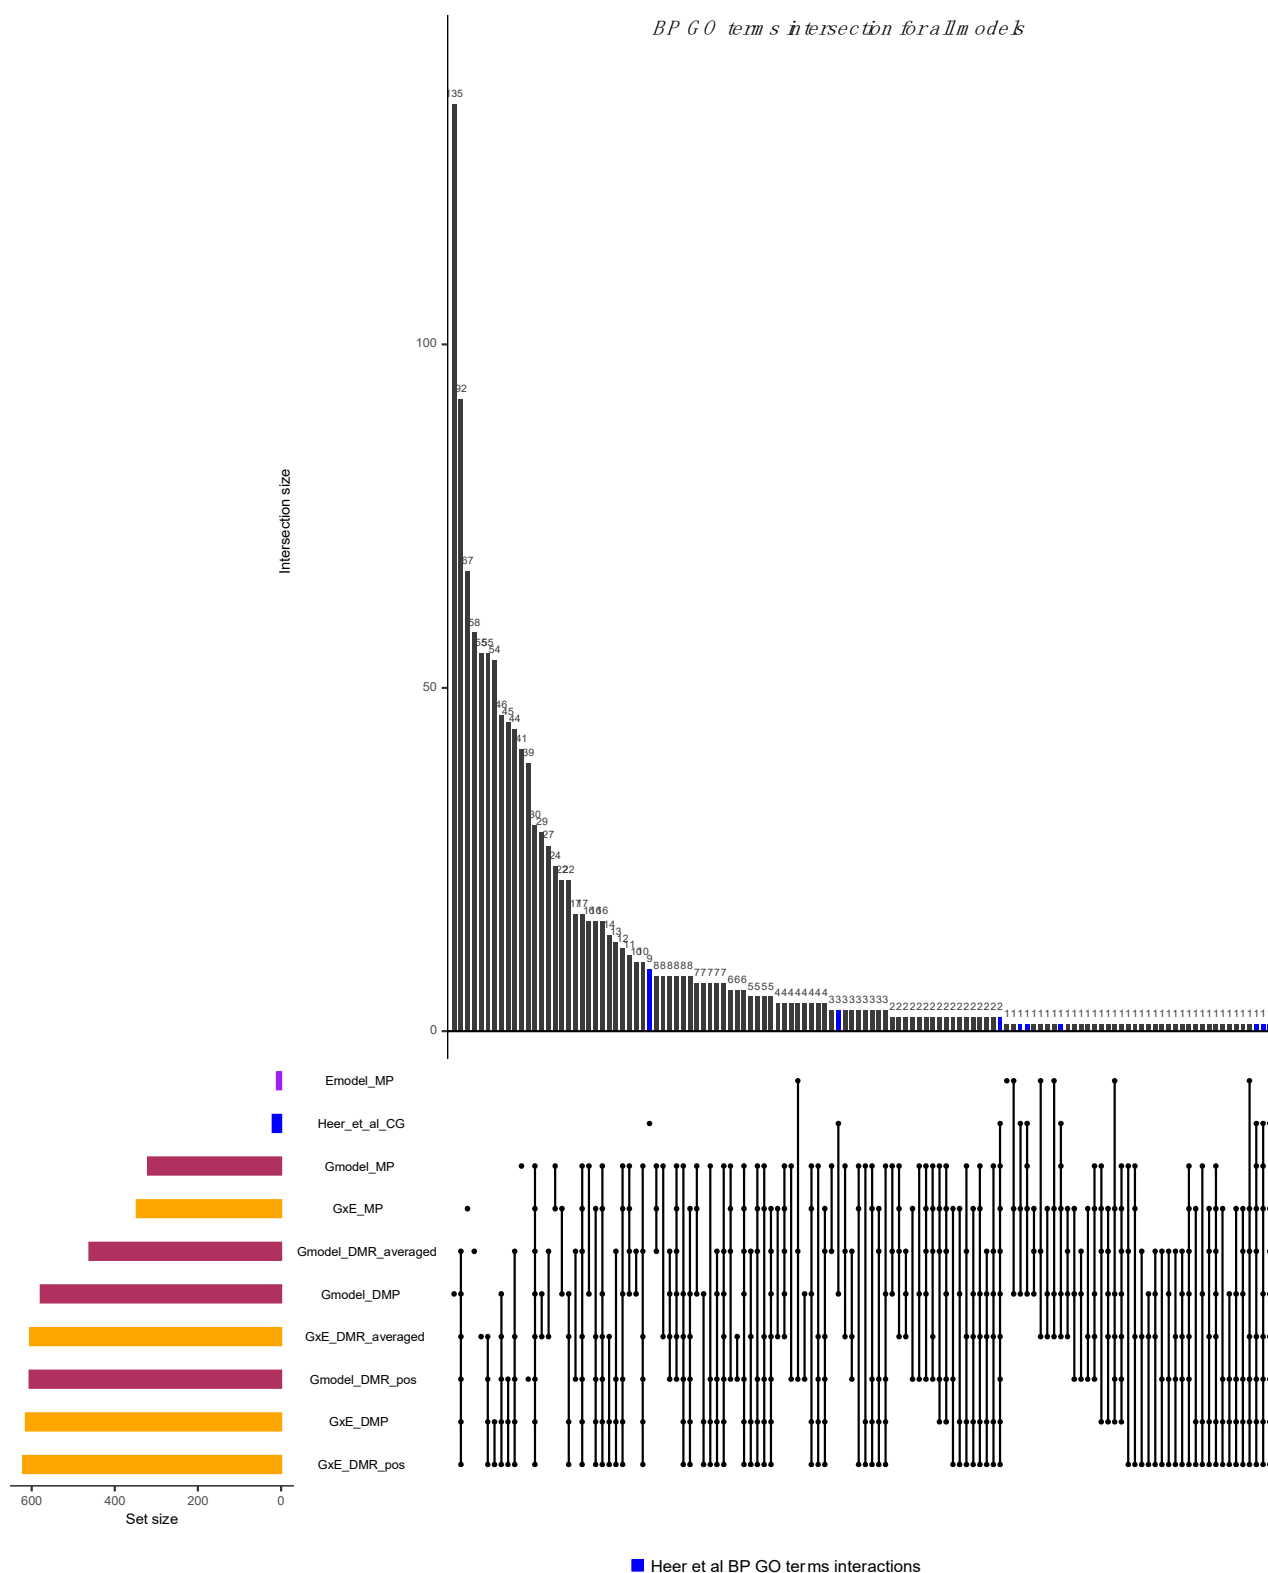

**Figure S38: Intersection of significant BP GO terms between all models, CG context, and precipitation data for location-based clustering, and a previous study [7] with the UpsetR package [8].**

The highest amount of sharing can be seen in G and GxE models DMP and DMR input types (98 terms). A term shared by seven groups as a maximum is “phenylpropanoid metabolic process”. 34, 52, 160, 149, 149, 111, 225, and 397 terms are shared by eight, seven, six, five, four, three, two, and single unique inputs. In total 69% of elements are shared and only 31% are unique to single inputs. The highest number of unique elements is derived from Gmodel DMP input with 137 terms and the lowest is with one term

for the Emodel MP input. 45% of Heer et al BP terms match with the other inputs and some unmatched terms show semantic similarity.

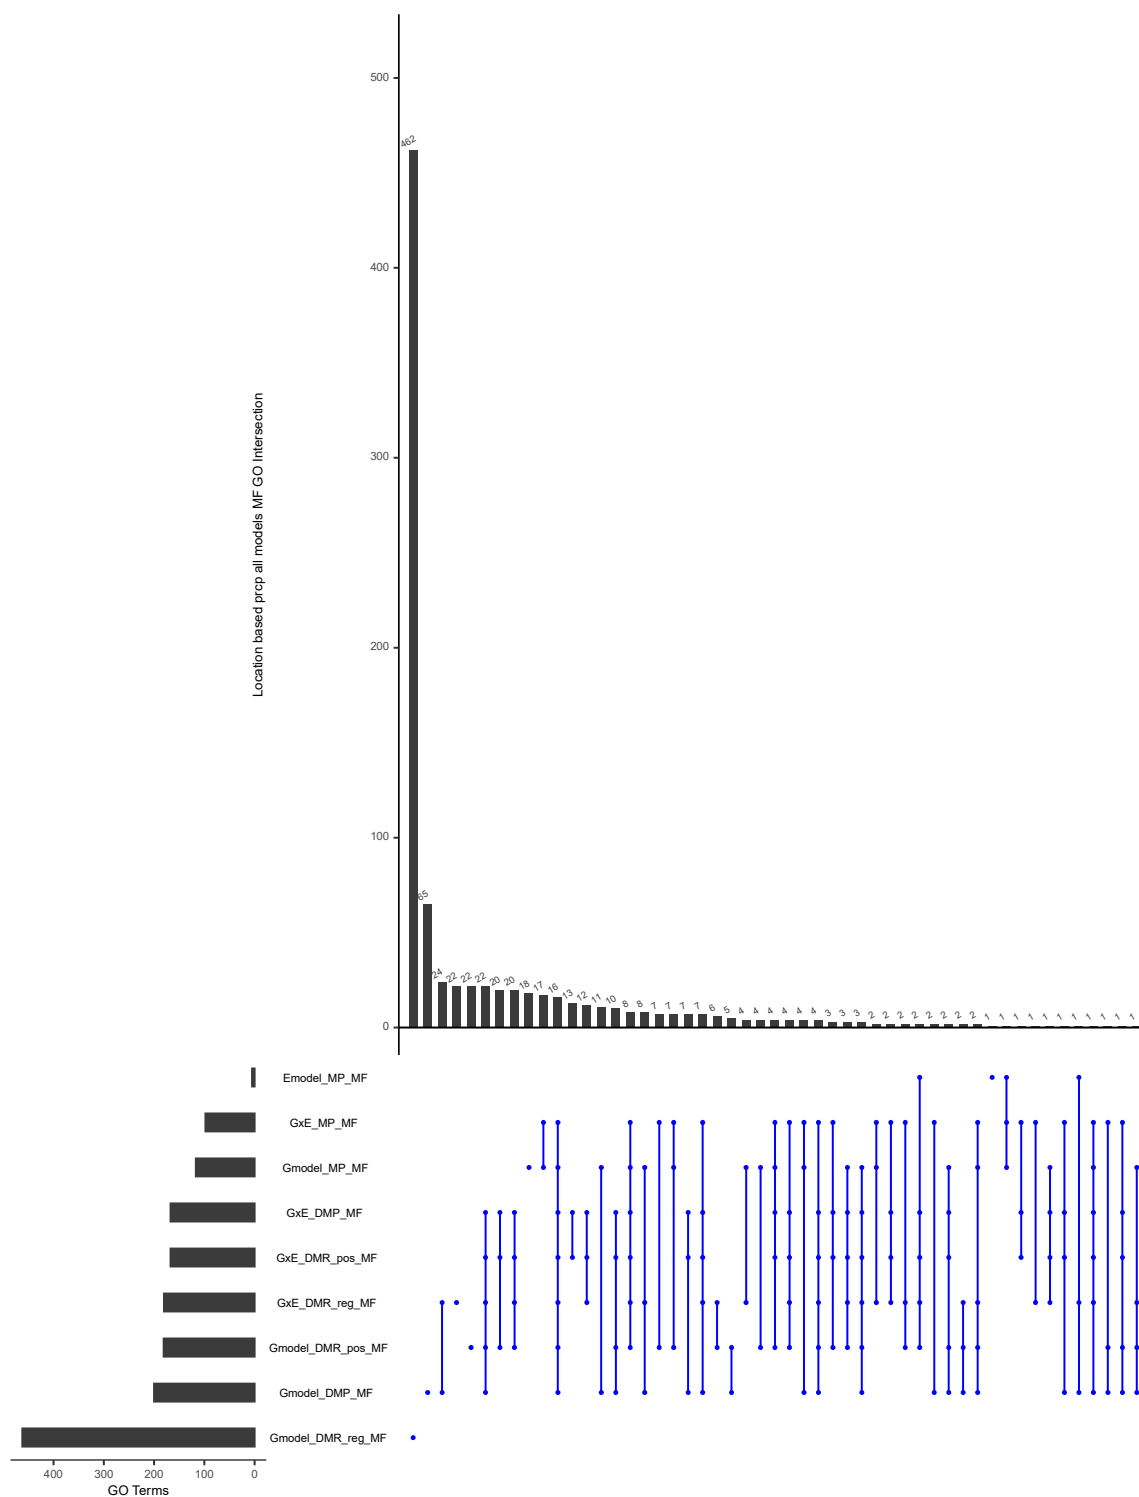

Figure S39: **Intersection of significant MF GO terms between all models, only CG context and precipitation data for location-based clustering, and a previous study [7] with UpsetR package [8].**

The highest sharing is seen in G and GxE models DMP and DMR (but reg for Gmodel) input types as 65. 13 terms are shared between seven outputs as highest intersection amount. 16, 14, 43, 44, 69, 92, and 611 terms are shared by seven, six, five, four, three, two, and single unique inputs. In total 31% of elements are shared and 69% are unique to the single inputs (reverse ratios with the BP output).

The highest number of unique elements belongs to the Gmodel DMR reg. input with 462 terms and the lowest is with one term for the Emodel MP input.

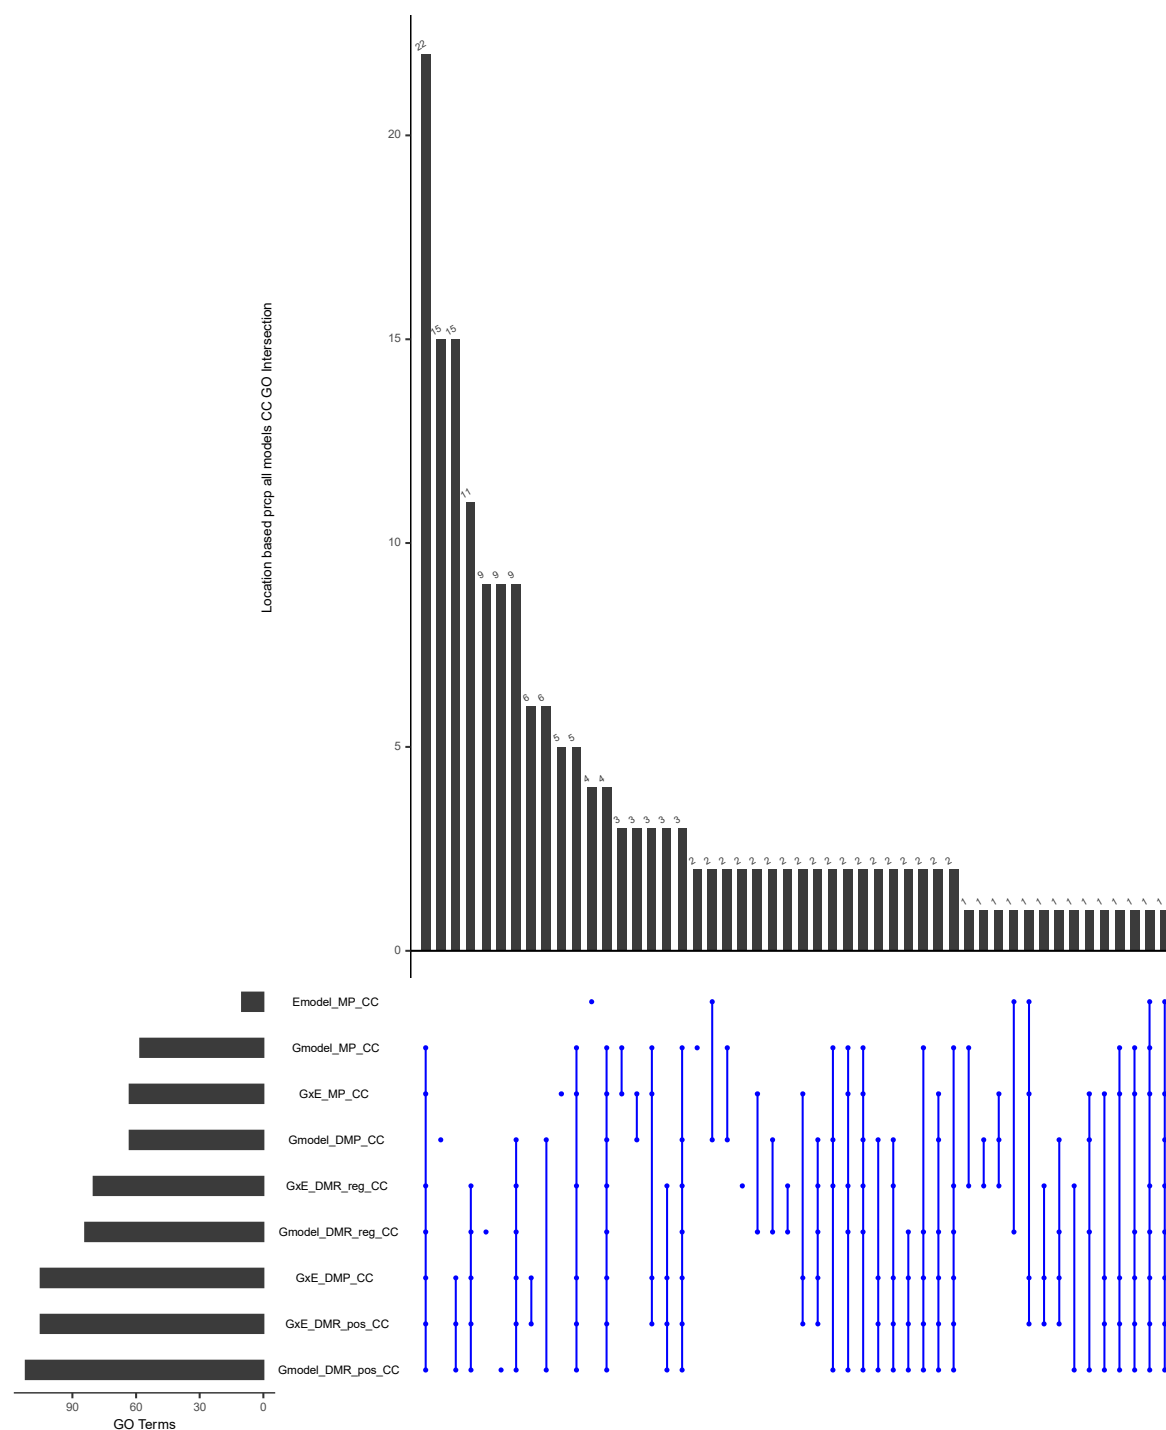

Figure S40: Intersection of significant CC GO terms between all models, only CG context and precipitation data for location-based clustering, and a previous study [7] with UpsetR package [8].

The highest sharing is seen between all models but the Emodel MP input type with 22 terms. The single term is shared by all outputs but Gmodel MP is “transferase complex” (on the far-right bar). 13 terms are shared between seven outputs as the highest intersection amount. 5, 26, 22, 26, 13, 22, 32, and 45 terms are shared by eight, seven, six, five, four, three, two, and single unique inputs. In total 76% of elements are shared and 23% are unique to the single inputs (reverse ratios with the BP output). The highest number of unique elements belongs to the Gmodel DMP input with 15 terms and the lowest is with two terms for the Gmodel MP and the GxE model DMR reg. input.

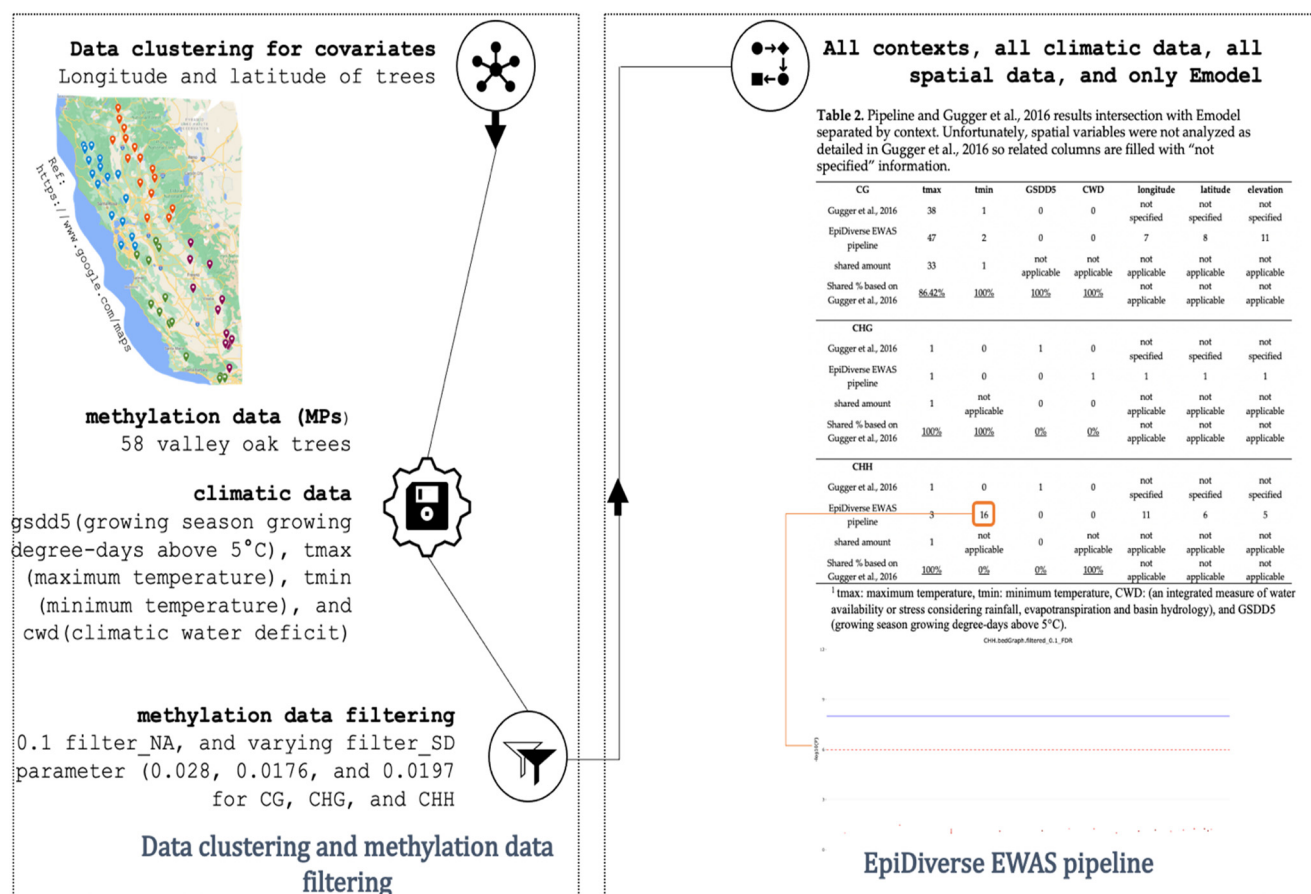

Figure S41: Guggen et al., 2016 [9] methylation and climatic data processing and analysis by the EpiDiverse EWAS pipeline. EWAS pipeline run was performed only with an Emodel and the intersection of Guggen analysis and the pipeline were outlined. An example Manhattan graph for the CHH context tmin data with the pipeline is shown below the statistic tables.

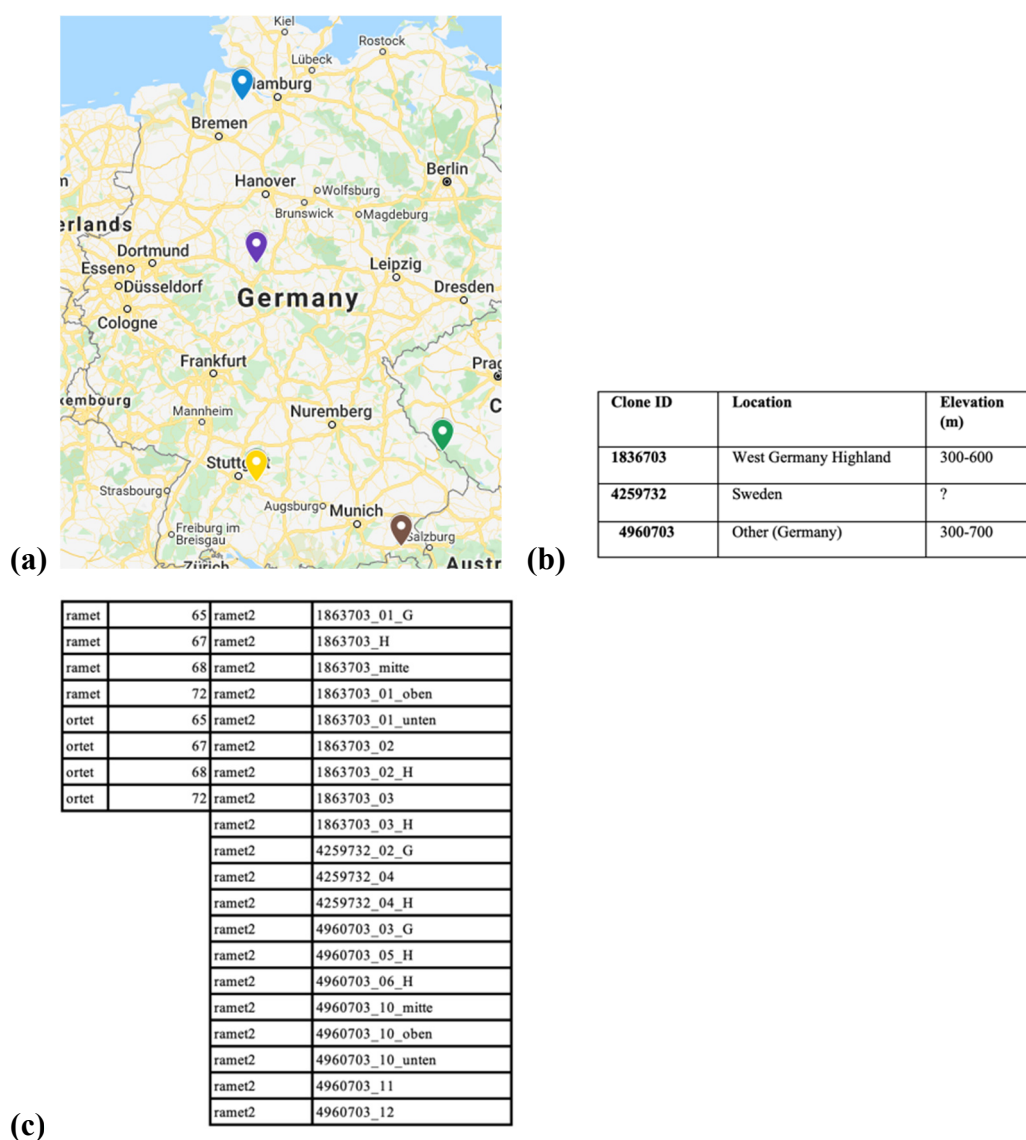

Figure S42: Location of *P. abies* trees (a), additional clone information (b), and grouping of trees (c).

The screenshot from Google maps with blue, purple, yellow, green, and brown colors are respectively for Harsefeld, Neuhaus, Göppingen locations with ortet and ramet growing areas (all are in Germany), ref: <https://www.google.com/maps>. (b) Elevation information for clone 4259732 is not known and marked as "?". Part (c) shows the grouping of trees. Ortet stands for the original tree, ramets are the clones of those ortets, and numbers (65, 67, 68, and 72) are tree IDs, ramet2 trees are also clones but independent from ortets, G and H stands for Goeppingen and Harsefeld respectively. "Mitte (middle)", "oben (up)" and "unten (below)" are the trees that belong to the Neuhaus area and middle, upper, and lower parts of the trees).

### The ratio of PCR Duplicates for *P. abies* dataset

The ratio of PCR duplicates by dividing them with the total number of reads were collected for the 28 *P. abies* samples (Figure S39), the average ratio was 54% and ranges between 36% to 82%. The line fit plot was showing a linear relationship with .65  $R^2$ . Therefore, the WGBS pipeline run was conducted with `–noDedup` parameter, i.e., not removing PCR duplicates. Stochastically, the more fragments of a genome are analyzed, the more identical fragments are expected. That means if the genome is sequenced with high depth, more duplicates will be seen than sequencing with low depths. Hence, an approximately linear relationship between depth and duplicates is expected. During PCR, a bias might exist that leads to some of the fragments being more often amplified than others. However, such data will probably not be Poisson distributed. If such a sample is sequenced, a steeper curve than a linear relationship is expected because of the skewed distribution of the sample. In other words, it is assumed that PCR introduces a bias [10], and hence shifts the distribution of observed fragments.

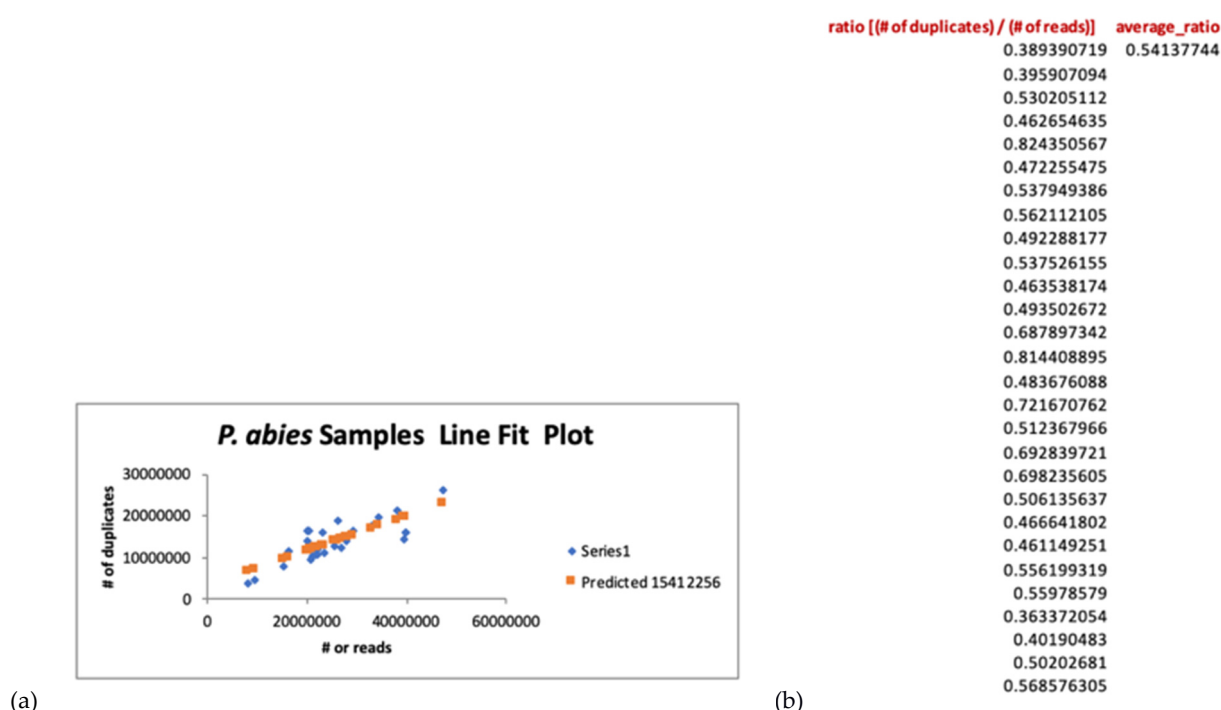

(a)

(b)

### SUMMARY OUTPUT

| Regression Statistics |             |
|-----------------------|-------------|
| Multiple R            | 0,81056618  |
| R Square              | 0,657017532 |
| Adjusted R Square     | 0,643298233 |
| Standard Error        | 2896720,4   |
| Observations          | 27          |

(c)

Figure S43: PCR duplicate analysis.

PCR duplicate ratio (a), line fit plot with a duplicate number of duplicates vs total reads (b), and statistical summary output (c).

## Blastx analysis with the *Q. lobata* dataset

13 Cs uniquely found by the pipeline with CG context and tmax data showed that three of them are genic with the closest gene hit, one shows no-hit, one was not found in a genic area with 57.0 Kb contig, and the rest found to be connected to related studies in the literature with (21–22570) bps (base pairs) distance to the closest genes. For example, receptor-like kinases show a great enlargement in the flowering plant lineage within Viridiplantae which may probably explains the gain of new roles that are essential for plants in constantly changing environment [11]. Ubiquitin carboxyl-terminal hydrolases are required for periodic maintenance of the circadian clock at high temperatures in Arabidopsis [12]. NAD biosynthesis is found to be essential in plant development and stress responses [13]. MYB58 and MYB63 are transcriptional activators of the lignin biosynthetic pathway during secondary cell wall formation in Arabidopsis [14] and Two MYB transcription factors as MYB63 and MYBR104 were stimulated in the wild type in response to heat in maize [15]. All eukaryotic circadian clocks take advantage of F-box proteins to form substrate adaptor components of a larger E3 ubiquitin ligase complex and the timing of the clock is decided by environmental factors for example light and temperature changes as well as a self-sustaining mechanism [16]. A study by Yamada et al., 2019 showed that TRANSPORT INHIBITOR RESPONSE (TIR2) is regulated by temperature and is necessary for temperature-dependent hypocotyl elongation [17]. The INO80 is the most recently well-known chromatin remodeler subfamily and it is represented by two complexes in cerevisiae INO80 and Swi2/snf2-related 1 (SWR1) [18]. H2A.Z deposition around the flowering locus (FLC) transcription start site (TSS) by SWR1 is required for FRI-mediated FLC activation and it was seen by Kumar and Wigge et al., 2010 that the temperature increases from 17 to 27 °C caused the eviction of the H2A.Z [19]. Ty1-copia elements are the insertion of the retrotransposon Hopscotch to the regulatory region of the gene teosinte branched1 (tb1) of the maize [20] and similar enhancing mechanisms are observed in other TE family members in maize which is for upregulating gene expression in response to abiotic stresses [21]. Wickland et al., 2015 proposed that their knowledge about FT/TFL1 gene family will let to modify florigen and anti-florigen action in the future and therefore promotes plant adaptation with climatic changes [22]. The auxin signaling pathway depends on the auxin gradient within cells and tissues, The TRYPTOPHAN AMINOTRANSFERASE OF ARABIDOPSIS (TAA)/YUCCA (YUC) pathway is the most well-known pathway to study auxin mechanisms and expression of YUC gene members are known to contribute to plant development besides environmental responses [23].

According to the pipeline results, genes found to be related to spatial variables seem found in root/shoot development systems in the literature. The closest genes with five Cs found to be related to longitude, latitude, elevation for the CG and CHG contexts showed suggestive results too none are genic but distance with [118,1357] bps to the closest gene. For example, the GDSL esterase/lipase protein (GELP) family is found to be important in plant growth and defense [24]. Naramoto et al., 2009 showed that phosphoinositide-dependent regulation of Van3 ARF-GAP localization and activity is important for vascular tissue persistence in plants [25]. The vesicle transport system appears to be crucial for plant development and environmental responses [26]. The closest gene to a single C (genic) associates with longitude for CG context encodes atypical and second-largest polymerase subunits in Arabidopsis are nuclear proteins with Pol IV and Pol V enzymes and play roles in RNA silencing and response biotic and abiotic stresses [27]. The other two closest genes to two Cs for latitude and elevation for the CG context with [2089,17001] bps distance showed that zinc finger BED domain-containing protein RICESLEEPER 3-like was found to be in stress-responsive mechanisms evolved by *S. chilense* to survive under high temperature, drought, and salt stress environment in Northern Chile of Atacama Desert [28]. Four Cs showed an association only with the elevation data for the CG context with [105,1290] bps distance to the closest gene and the literature showed that roots keep specific growth angles in many plants to the direction of gravity known as gravitropic setpoint angles (GSAs) for enough water and nutrient intake. Furutani et al., 2020 showed that some genes involved in GSA control by regulating auxin flow in Arabidopsis and RCC1-like domain (RLD) proteins are crucial regulators for polar auxin transport [29].

Tmin connected genes in the literature gave insights about environmental stress studies with various plant species. A single C found uniquely by the pipeline with CG context and tmin data was seen in a genic region and a relation to pentatricopeptide repeat (PPR) proteins. PPR proteins are one of the largest protein families in land plants and their function is found as effective on organelles biogenesis, photosynthesis, respiration, plant development, and environmental responses [30]. 16 Cs found only by the pipeline with CHH context and tmin data revealed meaningful insights too. Two of those 16 Cs are genic, one has no hits, one is not in a genic region with 17.0 Kb contig, and the rest have a distance between [116, 19,435] bps to the closest gene. The study by Baek et al., 2011 showed that overexpression of a gene encoding mitochondrial AAA protein in Arabidopsis, ATPase-in-Seed-Development (ASD), leads to morphological and anatomical seed maturation defects and it is induced by abiotic stresses like low temperature and high salinity [31]. Experiments by Kathiria et al., 2013 showed that high temperature is associated with N protein activity and therefore would result in less efficient response to tobacco mosaic virus (TMV) [32]. A KH domain-containing putative RNA-binding protein is found to be essential for heat-responsive gene regulation and thermotolerance in Arabidopsis [33]. Cysteine-rich receptor-like kinases (CRKs) were found to be related to cold, salt, drought, UV, wounding, heat, osmotic, and oxidative stress in Arabidopsis [34]. Data by Xia et al., 2017 suggested that microRNA5144 (osa-miR5144-3p) in rice responds to biotic stresses like salt, mercury, dark, and high temperature to modulate the protein disulfide isomerase (PDI) (OsPDIL1) [35]. Several studies showed that protein ubiquitination plays a very important role in plant developmental stages and abiotic stress responses such as drought and high salinity via diverse E3 ligases by mediating phytohormone and other pathways [36]. Plant peptides are key molecules of stress responses such as drought and high salinity and stress-related signaling peptides in plants found to be connected to proteolytic processing of protein precursors [37].

A single C uniquely found by the pipeline with the CG context and the CWD data seems to be connected to an uncharacterized protein for *Q. lobata* with a 1290 bps distance.

Table S1: *Q. lobata* blastx analysis

Genomic context of Cs with significant association to climate, and spatial variables including the number of Cs within the fragment, closest gene via blastx, distance to the closest gene (upstream). and putative protein product, sorted by matching status of Cs between Gugger et al., 2016 [9] study, and the EWAS pipeline. The fragment label shows the genomic contig and the position of the most significant C (contig: position) and the lowest p-values are listed for fragments with multiple significant C's. Distances are in nucleotides and measured from the closest end of the amino acid alignment.

| Fragment            | Climate or spatial association | Context          | Climate association Q-value (min) | Closest gene via BLASTX match                                            | Distance from BLASTX | BLASTX Expect (E value) | Per cent of nr database |
|---------------------|--------------------------------|------------------|-----------------------------------|--------------------------------------------------------------------------|----------------------|-------------------------|-------------------------|
| C2135867:734        | tmax                           | CG               | 0.0145158                         | heparan-alpha-glucosaminide N-acetyltransferase [Quercus lobata]         | 483                  | 3.73E-11                | 100                     |
| C2243561:431        | tmax                           | CG X 2, CHH, CHG | 0.00461053                        | none on 1.0 kb contig                                                    | NA                   | NA                      | NA                      |
| C2279863:599        | tmax                           | CG               | 0.000641161                       | UPF0481 protein At3g47200-like [Quercus lobata]                          | genic                | 1.08E-43                | 61.9                    |
| C2660447:1010       | tmax                           | CG               | 0.0240459                         | SKP1-like protein 1B-like [Tripterygium wilfordii]                       | -305                 | 3.00E-22                | 82                      |
| C2687893:1978       | tmax                           | CG X 6           | 0.0164384                         | mitochondrial outer membrane protein porin 4 [Quercus lobata]            | 394                  | 2.00E-58                | 93                      |
| C2716265:837        | tmax                           | CG               | 0.0274896                         | protein HES01 [Quercus lobata]                                           | 9                    | 2.00E-84                | 98.45                   |
| scaffold11289:53221 | tmax                           | CG X 3           | 0.0145158                         | uncharacterized protein LOC115950208 [Quercus lobata]                    | 11779                | 4.00E-73                | 96.55                   |
| scaffold1450:104386 | tmax                           | CG               | 0.0829442                         | uncharacterized protein LOC115952099                                     | -15979               | 0.00E+00                | 50.552                  |
| scaffold20751:23374 | tmax                           | CG X 9           | 0.00315336                        | dehydration-responsive element-binding protein 1B-like [Quercus lobata]  | genic                | 1e-107                  | 99.17                   |
| scaffold2576:38891  | tmax                           | CG X 2           | 0.0711293                         | short-chain dehydrogenase/reductase family 42E member 1 [Quercus lobata] | -1290                | 6e-79                   | 100                     |
| scaffold27436:2761  | tmax                           | CG               | 0.0264279                         | protein SIEVE ELEMENT OCCLUSION B-like [Quercus suber]                   | -5854                | 1.00E-04                | 63.16                   |
| scaffold4607:51780  | tmax                           | CG               | 0.0678375                         | probable methyltransferase PMT5 [Quercus lobata]                         | -217                 | 2.14E-14                | 83.6                    |
| scaffold7563:31896  | tmax                           | CG X 2           | 0.0860142                         | exopolysaccharuronase-like [Quercus lobata]                              | genic                | 5e-120                  | 100                     |
| scaffold877:14952   | tmax                           | CG               | 0.0531586                         | pentatricopeptide repeat-containing protein At1g20230 [Quercus lobata]   | -1637                | 0.00E+00                | 99.87                   |
| scaffold9024:922    | tmin, tmax                     | CG, CHH          | 0.00277591                        | hypothetical protein HVC85_028212 [Camellia sinensis]                    | 8252                 | 4.00E-04                | 55.32                   |
| C2163755:95         | tmax                           | CG               | 0.0336844                         | cysteine-rich receptor-like protein kinase 19 [Quercus lobata]           | -358                 | 9.28E-55                | 100                     |
| C2492003:414        | tmax                           | CG               | 0.0292999                         | ubiquitin carboxyl-terminal hydrolase MINDY-3 [Quercus lobata]           | -21                  | 0.00E+00                | 100                     |

|                     |                                    |             |            |                                                                                       |        |          |       |
|---------------------|------------------------------------|-------------|------------|---------------------------------------------------------------------------------------|--------|----------|-------|
| scaffold10371:36553 | tmax                               | CG          | 0.0837199  | uncharacterized protein At4g14450, chloroplastic-like [Quercus lobata]                | 11918  | 3.00E-66 | 100   |
| scaffold11764:34472 | tmax                               | CG          | 0.0902859  | NAD+ synthase [Hoeftia marina]                                                        | 1061   | 3.40E-02 | 78.26 |
| scaffold12971:18452 | tmax                               | CG          | 0.0902859  | transcription factor MYB63-like [Quercus lobata]                                      | -22570 | 0.00E+00 | 99.65 |
| scaffold15605:15293 | tmax                               | CG          | 0.0885572  | putative F-box protein At1g47790 [Quercus lobata]                                     | 6244   | 0.00E+00 | 100   |
| scaffold16331:7389  | tmax                               | CG          | 0.0860142  | RRP12-like protein [Quercus lobata]                                                   | 8263   | 2.00E-43 | 98.73 |
| scaffold18176:14869 | tmax                               | CG          | 0.0711293  | transport inhibitor response 1-like protein [Quercus lobata]                          | 320    | 0.00E+00 | 100   |
| scaffold18408:10636 | tmax                               | CG          | 0.0233086  | ATP-dependent helicase BRM isoform X2 [Quercus lobata]                                | genic  | 2e-105   | 99.4  |
| scaffold24805:809   | tmax                               | CG          | 0.0902859  | no hits found                                                                         | NA     | NA       | NA    |
| scaffold3494:53955  | tmax                               | CG          | 0.0264279  | Ty1/Copia family ribonuclease HI [Bacillus coagulans]                                 | 7021   | 3.00E-58 | 50.28 |
| scaffold41507:9942  | tmax                               | CG          | 0.0860142  | FT-interacting protein 3-like [Quercus lobata]                                        | genic  | 0        | 100   |
| scaffold6889:211950 | tmax                               | CG          | 0.0829442  | L-tryptophan-pyruvate aminotransferase 1 [Quercus lobata]                             | genic  | 3.46E-18 | 96.9  |
| C2432489:725        | tmin                               | CG          | 0.0484508  | Pentatricopeptide repeat-containing protein At5g18390, mitochondrial [Quercus lobata] | genic  | 0        | 100   |
| scaffold17237:20407 | longitude, latitude, elevation     | CG          | 0.00671081 | VAN3-binding protein [Quercus lobata]                                                 | -1357  | 7.00E-59 | 80.39 |
| C1857159:430        | longitude                          | CG          | 0.0651646  | DNA-directed RNA polymerases IV and V subunit 2-like [Quercus lobata]                 | genic  | 2.00E-97 | 100   |
| scaffold12904:46759 | longitude, latitude, and elevation | CG          | 0.0263294  | GDSL esterase/lipase At5g45670-like [Quercus lobata]                                  | -118   | 2.00E-52 | 95.6  |
| scaffold24291:61775 | latitude X 2, elevation            | CG          | 0.023653   | zinc finger BED domain-containing protein RICESLEEPER 2-like [Camellia sinensis]      | 17001  | 1e-34    | 57.72 |
| scaffold2525:43216  | longitude, latitude, and elevation | CG X 3, CHG | 1.78E-05   | uncharacterized protein LOC115970248 [Quercus lobata]                                 | 1354   | 9e-43    | 75.76 |
| scaffold9188:19867  | latitude, elevation                | CG          | 0.0186881  | kinesin-like protein KIN-12C [Quercus lobata]                                         | -2089  | 8e-45    | 97.56 |
| scaffold34567:4783  | elevation                          | CG          | 0.0933422  | hypothetical protein CCACVL1_00579 [Cochorus capsularis]                              | -105   | 0.004    | 74.19 |
| scaffold14291:97792 | elevation                          | CG X 2      | 0.0880809  | none on 40.0 kb contig                                                                | NA     | NA       | NA    |
| C2692053:1750       | elevation                          | CG          | 0.081777   | PH, RCC1 and FYVE domains-containing protein 1-like [Quercus lobata]                  | 1274   | 4e-76    | 100   |
| scaffold24798:8357  | CWD                                | CHG         | 0.0773968  | uncharacterized protein LOC115985343 [Quercus lobata]                                 | -1290  | 3.00E-59 | 89.8  |
| scaffold10407:15711 | tmin                               | CHH         | 0.0662687  | no hits found                                                                         | NA     | NA       | NA    |
| scaffold10862:27958 | tmin                               | CHH         | 0.098611   | uncharacterized protein LOC115956251 [Quercus lobata]                                 | genic  | 9e-133   | 83.2  |

|                     |                                          |         |            |                                                                        |       |           |       |
|---------------------|------------------------------------------|---------|------------|------------------------------------------------------------------------|-------|-----------|-------|
| scaffold14444:52956 | tmin                                     | CHH     | 0.0722576  | uncharacterized protein LOC115959459 [Quercus lobata]                  | 7679  | 0         | 64.99 |
| scaffold16568:31152 | tmin                                     | CHH     | 0.0561036  | uncharacterized protein LOC115990037 [Quercus lobata]                  | -116  | 2.00E-108 | 85.16 |
| scaffold18257:4451  | tmin                                     | CHH     | 0.0725103  | AAA-ATPase At3g50940-like [Quercus lobata]                             | 1271  | 0.00E+00  | 100   |
| scaffold203:20709   | tmin                                     | CHH     | 0.0662687  | hypothetical protein CMV_020407 [Castanea mollissima]                  | -7650 | 0         | 100   |
| scaffold21196:12675 | tmin                                     | CHH     | 0.0561036  | TMV resistance protein N-like [Quercus lobata]                         | 1993  | 1.00E-109 | 98.83 |
| scaffold21666:33740 | tmin                                     | CHH     | 0.0561036  | KH domain-containing protein At4g18375 [Quercus lobata]                | 1513  | 3.00E-136 | 98.98 |
| scaffold2940:64285  | tmin                                     | CHH X 3 | 0.0602405  | uncharacterized protein LOC115961955 [Quercus lobata]                  | genic | 0.00E+00  | 94.32 |
| scaffold30221:60787 | tmin                                     | CHH     | 0.0757422  | uncharacterized protein LOC115974015 [Quercus lobata]                  | 10842 | 3.00E-172 | 99.62 |
| scaffold40023:13580 | tmin                                     | CHH     | 0.0561036  | hypothetical protein [Tanacetum cinerariifolium]                       | -3977 | 1.00E-59  | 93.4  |
| scaffold4751:19577  | tmin                                     | CHH     | 0.0787377  | putative cysteine-rich receptor-like protein kinase 9 [Quercus lobata] | 1342  | 2.00E-112 | 85.71 |
| scaffold5942:282421 | tmin                                     | CHH     | 0.0996185  | none on 17 kb contig                                                   | NA    | NA        | NA    |
| scaffold7242:68670  | tmin                                     | CHH     | 0.0332872  | uncharacterized protein LOC112019070 [Quercus suber]                   | 19435 | 4e-97     | 82.68 |
| scaffold8993:27871  | tmin                                     | CHH     | 0.0757422  | protein disulfide isomerase-like 1-6 [Quercus lobata]                  | 16819 | 8.00E-119 | 100   |
| scaffold1177:136473 | tmax                                     | CHH     | 0.0790621  | none on 80 kb contig                                                   | NA    | NA        | NA    |
| scaffold32607:1777  | longitude                                | CHH     | 0.058845   | uncharacterized protein LOC115961982 [Quercus lobata]                  | genic | 9e-161    | 60.62 |
| scaffold30338:20218 | longitude                                | CHH     | 0.0534505  | E3 ubiquitin-protein ligase AIP2 [Quercus suber]                       | -211  | 7.00E-44  | 97.22 |
| scaffold385:75210   | longitude                                | CHH     | 0.0480613  | none on 36 kb contig                                                   | NA    | NA        | NA    |
| scaffold8012:41559  | longitude                                | CHH     | 0.0436613  | none on 14 kb contig                                                   | NA    | NA        | NA    |
| scaffold2525:43227  | longitude, latitude, and elevation, tmin | CHH X 5 | 0.00341586 | protease Do-like 7 [Quercus suber]                                     | 7771  | 2.00E-57  | 64.89 |
| C2705937:2352       | longitude                                | CHH     | 0.0339211  | hypothetical protein RHSIM_Rhsim01G0051200 [Rhododendron simsii]       | 733   | 1.00E-60  | 55.81 |
| scaffold3249:231768 | longitude                                | CHH     | 0.0339211  | none on 18 kb contig                                                   | NA    | NA        | NA    |
| scaffold5469:4524   | latitude, elevation                      | CHH     | 0.0869118  | uncharacterized protein LOC115963309 [Quercus lobata]                  | genic | 0         | 98.17 |

Table S2: Missing data estimation of EpiDiverse EWAS pipeline (a) and GEM R package (b) [38]. Missing data statistics for *P. abies* dataset with CG (c), CHG (d), and CHH (e) contexts.

GEM's missing data estimation was misleading due to missing values, it was expected (a) that only FDR of the same position should differ colored as red and the rest should be the same as shown in green, but this was not the case (b) for GEM package. Some statistics like beta coefficient, t-statistic, and p-value were also calculated as different for the same position they only depend on the number of samples, not the total number of tests. "0" filter\_NA and filter\_SD parameters lead to 7%, 7% and 5% of total data for CG (c), CHG (d) and CHH (e) contexts. Different NA filtering from 0 to 0.90 intervals with 0.10 increments was used with single covariates, pairwise combinations, and all to test the effect of the filter\_NA parameter. Please see the "Filtering missing data after uniting mapped reads" chapter in the main document for more details.

| methylation calls output | CpG | SNP(with G and GxE models) | beta coefficient | t-statistic | p-value | FDR |
|--------------------------|-----|----------------------------|------------------|-------------|---------|-----|
| scaffold1_pos1           |     |                            |                  |             |         |     |

(a)

| methylation calls output | CpG | SNP(with G and GxE models) | beta coefficient | t-statistic | p-value | FDR |
|--------------------------|-----|----------------------------|------------------|-------------|---------|-----|
| scaffold1_pos1           |     |                            |                  |             |         |     |

(b)

| context:CG     |          |          |          |          |          |          |          |
|----------------|----------|----------|----------|----------|----------|----------|----------|
| filter_NA      | SD>=0    | SD>=0.01 | SD>=0.02 | SD>=0.03 | SD>=0.04 | SD>=0.05 | SD>=0.1  |
| 1 (whole data) | 100      | 85.153   | 81.90743 | 78.61236 | 75.7394  | 73.1676  | 63.66231 |
| 0              | 7.183985 | 6.73756  | 6.009393 | 5.347533 | 4.801495 | 4.3389   | 2.539602 |
| 0.1            | 13.92669 | 12.79063 | 11.49225 | 10.32303 | 9.36978  | 8.585965 | 5.75164  |
| 0.2            | 23.37534 | 20.88417 | 18.83888 | 16.99949 | 15.5426  | 14.32861 | 10.20437 |
| 0.3            | 32.23377 | 28.14355 | 25.53151 | 23.16221 | 21.26519 | 19.6703  | 14.42738 |
| 0.4            | 40.26477 | 34.44791 | 31.49925 | 28.72294 | 26.47437 | 24.5761  | 18.41943 |
| 0.5            | 47.46093 | 39.93573 | 36.7995  | 33.75252 | 31.25347 | 29.14142 | 22.24315 |
| 0.6            | 51.94222 | 43.30974 | 40.1115  | 36.95909 | 34.3281  | 32.09423 | 24.77461 |
| 0.7            | 58.47812 | 48.22868 | 45.00093 | 41.76229 | 38.99429 | 36.60666 | 28.72201 |
| 0.8            | 65.64178 | 53.64643 | 50.40824 | 47.13255 | 44.29136 | 41.79891 | 33.33625 |
| 0.9            | 76.38519 | 61.53819 | 58.29262 | 54.99755 | 52.12459 | 49.55279 | 40.0475  |

(c)

| context:CHG    |          |          |          |          |          |          |          |
|----------------|----------|----------|----------|----------|----------|----------|----------|
| filter_NA      | SD>=0    | SD>=0.01 | SD>=0.02 | SD>=0.03 | SD>=0.04 | SD>=0.05 | SD>=0.1  |
| 1 (whole data) | 100      | 78.3535  | 73.59877 | 68.94692 | 65.12936 | 61.97948 | 52.09532 |
| 0              | 7.015135 | 6.445415 | 5.618783 | 4.924045 | 4.380634 | 3.939505 | 2.215696 |
| 0.1            | 14.25013 | 12.62472 | 10.97799 | 9.580412 | 8.499923 | 7.65552  | 4.783059 |
| 0.2            | 24.91511 | 21.01059 | 18.14793 | 15.67612 | 13.83572 | 12.38552 | 7.960841 |
| 0.3            | 34.74895 | 28.13361 | 24.33299 | 21.01319 | 18.50788 | 16.51788 | 10.78365 |
| 0.4            | 43.35413 | 33.8973  | 29.57225 | 25.62209 | 22.60843 | 20.22477 | 13.47159 |
| 0.5            | 50.86679 | 38.66873 | 34.06141 | 29.71799 | 26.35309 | 23.69792 | 16.17178 |
| 0.6            | 55.44294 | 41.51547 | 36.81956 | 32.3386  | 28.79566 | 25.99746 | 18.05174 |
| 0.7            | 61.96619 | 45.62302 | 40.88814 | 36.29623 | 32.5878  | 29.61434 | 21.14473 |
| 0.8            | 68.87794 | 50.24202 | 45.49515 | 40.86231 | 37.07512 | 34.00019 | 25.02301 |
| 0.9            | 78.90952 | 57.26302 | 52.50829 | 47.85644 | 44.03888 | 40.889   | 31.00485 |

(d)

(e)

| context: CHH   |          |          |          |          |          |          |          |
|----------------|----------|----------|----------|----------|----------|----------|----------|
| filter NA      | SD>=0    | SD>=0.01 | SD>=0.02 | SD>=0.03 | SD>=0.04 | SD>=0.05 | SD>=0.1  |
| 1 (whole data) | 100      | 62.88156 | 57.26846 | 51.91174 | 47.52326 | 43.98433 | 34.77636 |
| 0              | 5.57226  | 4.386021 | 2.883888 | 1.885208 | 1.266226 | 0.880526 | 0.191903 |
| 0.1            | 10.94162 | 8.497514 | 6.029757 | 4.221747 | 3.007255 | 2.202042 | 0.581595 |
| 0.2            | 18.82104 | 13.98604 | 10.35435 | 7.507061 | 5.549493 | 4.172654 | 1.251026 |
| 0.3            | 26.56354 | 18.84145 | 14.29122 | 10.59255 | 7.980436 | 6.075174 | 1.967498 |
| 0.4            | 33.96631 | 22.8894  | 17.7993  | 13.40728 | 10.2282  | 7.873528 | 2.710093 |
| 0.5            | 41.06613 | 26.25673 | 20.8424  | 15.95377 | 12.31647 | 9.610056 | 3.525333 |
| 0.6            | 45.7106  | 28.19992 | 22.66701 | 17.58184 | 13.67699 | 10.7707  | 4.110746 |
| 0.7            | 52.78919 | 30.78139 | 25.19118 | 19.93012 | 15.74738 | 12.5263  | 5.060556 |
| 0.8            | 60.78352 | 33.18546 | 27.5746  | 22.2354  | 17.88863 | 14.46531 | 6.176177 |
| 0.9            | 72.92983 | 35.81139 | 30.19829 | 24.84157 | 20.45309 | 16.91416 | 7.706189 |

Table S3: EWAS output and GO statistics.

The uppermost table shows statistics for all models, precipitation data, CG context with location-based clustering. The following three tables are only for the Emodel, context, and separated with environment data as precipitation, tmax, and tmin respectively. Each table is also separated into contexts for CG, CHG, and CHH. No input means either no significant output is produced by the pipeline or no gene conjugate was found to perform GO analysis. No output means the GOSTAT pipeline did not yield any significant CG. Different color is for discriminating different tables, inputs, and models and have no other meaning.

| Precipitation data, CG context, and location-based clustering |                                   |                                     |                                     |                                   |
|---------------------------------------------------------------|-----------------------------------|-------------------------------------|-------------------------------------|-----------------------------------|
| model                                                         | meth_calls                        | DMPs                                | DMRs_position                       | DMRs_region                       |
| Gmodel                                                        | 4603 (BP[320], MF [117], CC [55]) | 7595 (BP[320], MF [117], CC [55])   | 12278 (BP[607], MF [183], CC [112]) | 5793 (BP[462], MF [187], CC [85]) |
| GxE                                                           | 2656 (BP[358], MF [115], CC [63]) | 12979 (BP[623], MF [170], CC [105]) | 7814 (BP[544], MF [154], CC [82])   | 7681 (BP[594], MF [182], CC [79]) |
| Emodel                                                        | 3 (BP[10], MF [5], CC [10])       | no input                            | no output                           | no input                          |

| Only Emodel and precipitation data |                             |           |               |             |
|------------------------------------|-----------------------------|-----------|---------------|-------------|
| CG context                         | meth_calls                  | DMPs      | DMRs_position | DMRs_region |
| location_based_clustering          | 3 (BP[10], MF [5], CC [10]) | no input  | no output     | no output   |
| SNP_HC_based_clustering            | no output                   | no output | no output     | no output   |
| meth_HC_based_clustering           | no output                   | no output | no output     | no output   |

| CHG context               |                              |               |                            |                             |
|---------------------------|------------------------------|---------------|----------------------------|-----------------------------|
| meth_calls                | DMPs                         | DMRs_position | DMRs_region                |                             |
| location_based_clustering | 21 (BP[77], MF [16], CC [8]) | no input      | 2 (BP[24], MF [8], CC [8]) | 2 (BP[51], MF [10], CC [8]) |
| SNP_HC_based_clustering   | no output                    | no output     | no output                  | no output                   |
| meth_HC_based_clustering  | no input                     | no input      | no input                   | no output                   |

| CHH context               |                                 |               |             |           |
|---------------------------|---------------------------------|---------------|-------------|-----------|
| meth_calls                | DMPs                            | DMRs_position | DMRs_region |           |
| location_based_clustering | 210 (BP[169], MF [39], CC [32]) | no input      | no output   | no output |
| SNP_HC_based_clustering   | no output                       | no output     | no output   | no output |
| meth_HC_based_clustering  | no output                       | no output     | no output   | no output |

| Only Emodel and tmax data |            |                            |               |             |
|---------------------------|------------|----------------------------|---------------|-------------|
| CG context                | meth_calls | DMPs                       | DMRs_position | DMRs_region |
| location_based_clustering | no output  | 14 (BP[8], MF [8], CC [0]) | no output     | no output   |
| SNP_HC_based_clustering   | no output  | no output                  | no output     | no output   |
| meth_HC_based_clustering  | no output  | no output                  | no output     | no output   |

| CHG context               |                           |               |             |           |
|---------------------------|---------------------------|---------------|-------------|-----------|
| meth_calls                | DMPs                      | DMRs_position | DMRs_region |           |
| location_based_clustering | 6 (BP[0], MF [8], CC [0]) | no output     | no output   | no output |
| SNP_HC_based_clustering   | no output                 | no output     | no output   | no output |
| meth_HC_based_clustering  | no output                 | no output     | no output   | no output |

| CHH context               |                              |               |             |           |
|---------------------------|------------------------------|---------------|-------------|-----------|
| meth_calls                | DMPs                         | DMRs_position | DMRs_region |           |
| location_based_clustering | 56 (BP[54], MF [14], CC [8]) | no output     | no output   | no output |
| SNP_HC_based_clustering   | no output                    | no output     | no output   | no output |
| meth_HC_based_clustering  | no output                    | no output     | no output   | no output |

| Only Emodel and tmin data |                                 |                              |               |             |
|---------------------------|---------------------------------|------------------------------|---------------|-------------|
| CG context                | meth_calls                      | DMPs                         | DMRs_position | DMRs_region |
| location_based_clustering | 4 (BP[8], MF [0], CC [0])       | no input                     | no output     | no output   |
| SNP_HC_based_clustering   | no output                       | no output                    | no output     | no output   |
| meth_HC_based_clustering  | no output                       | no output                    | no output     | no output   |
| CHG context               | meth_calls                      | DMPs                         | DMRs_position | DMRs_region |
| location_based_clustering | 84 (BP[92], MF [41], CC [8])    | 3 (BP[32], MF [0], CC [8])   | no output     | no output   |
| SNP_HC_based_clustering   | no output                       | no output                    | no output     | no output   |
| meth_HC_based_clustering  | no output                       | no output                    | no output     | no output   |
| CHH context               | meth_calls                      | DMPs                         | DMRs_position | DMRs_region |
| location_based_clustering | 815 (BP[217], MF [95], CC [27]) | 14 (BP[19], MF [14], CC [8]) | no output     | no output   |
| SNP_HC_based_clustering   | no output                       | no output                    | no output     | no output   |
| meth_HC_based_clustering  | no output                       | no output                    | no output     | no output   |

Table S4: Statistics of additional *P. abies* samples.

Total number of reads after trimming, number of bases, and average coverage for 20 *P. abies* samples.

| name            | # of reads (after trimming) | # of bases  | average_coverage |
|-----------------|-----------------------------|-------------|------------------|
| 1863703_01_G    | 36,704,179                  | 4920072696  | 20.4608          |
| 1863703_01mitte | 39,158,493                  | 5158271910  | 15.4527          |
| 1863703_01oben  | 52,045,993                  | 6853371594  | 19.2579          |
| 1863703_01unten | 36,132,791                  | 4916389948  | 14.7774          |
| 1863703_02      | 48,798,096                  | 6638285280  | 18.5874          |
| 1863703_02_H    | 15,180,549                  | 2047061774  | 7.53737          |
| 1863703_03      | 37,121,421                  | 5047374726  | 15.426           |
| 1863703_03_H    | 36,153,526                  | 4755359364  | 15.7525          |
| 1863703_01_H    | 17,809,172                  | 2402344197  | 8.32586          |
| 4259732_02_G    | 37,664,957                  | 5044588256  | 20.0201          |
| 4259732_04      | 38,859,058                  | 5267817786  | 15.478           |
| 4259732_04_H    | 47,124,752                  | 6200261578  | 19.583           |
| 4960703_03_G    | 27,974,432                  | 3678537518  | 11.8483          |
| 4960703_05_H    | 29,460,718                  | 3873438994  | 13.8074          |
| 4960703_06_H    | 41,188,872                  | 5412522166  | 17.5583          |
| 4960703_10mitte | 47,248,888                  | 6437003646  | 18.1052          |
| 4960703_10oben  | 39,950,533                  | 5424276914  | 16.1239          |
| 4960703_10unten | 36,340,407                  | 4951833930  | 14.2717          |
| 4960703_11      | 85,163,807                  | 11499000000 | 25.8284          |
| 4960703_12      | 70,050,616                  | 9457219816  | 22.1892          |

### Supplementary references

1. Quinlan, A.R. and I.M. Hall, *BEDTools: a flexible suite of utilities for comparing genomic features*. Bioinformatics, 2010. **26**(6): p. 841-2.

2. Jühling, F., *metilene: fast and sensitive calling of differentially methylated regions from bisulfite sequencing data*, S.H.B. Helene Kretzmer, Christian Otto, Peter F. Stadler, Steve Hoffmann, Editor. 2016.
3. Nye, T.M., P. Liò, and W.R. Gilks, *A novel algorithm and web-based tool for comparing two alternative phylogenetic trees*. Bioinformatics, 2006. **22**(1): p. 117-9.
4. Murray, K.D., et al., *kWIP: The k-mer weighted inner product, a de novo estimator of genetic similarity*. PLoS Comput Biol, 2017. **13**(9): p. e1005727.
5. Martínez-Cambor, P., S. Pérez-Fernández, and S. Díaz-Coto, *The role of the p-value in the multitesting problem*, Journal of Applied Statistics. Journal of Applied Statistics, 2020. **47**:9: p. 1529-1542.
6. Nunn, A., et al., *Manipulating base quality scores enables variant calling from bisulfite sequencing alignments using conventional Bayesian approaches*. BioRxiv, 2020. **10.1101/2021.01.11.425926**: p. 17.
7. Heer, K., et al., *Detection of somatic epigenetic variation in Norway spruce via targeted bisulfite sequencing*. Ecol Evol, 2018. **8**(19): p. 9672-9682.
8. Conway, J.R., A. Lex, and N. Gehlenborg, *UpSetR: an R package for the visualization of intersecting sets and their properties*. Bioinformatics, 2017. **33**(18): p. 2938-2940.
9. Gugger, P.F., et al., *Species-wide patterns of DNA methylation variation in Quercus lobata and their association with climate gradients*. Mol Ecol, 2016. **25**(8): p. 1665-80.
10. Parekh, S., et al., *The impact of amplification on differential expression analyses by RNA-seq*. Sci Rep, 2016. **6**: p. 25533.
11. Jose, J., S. Ghantasala, and S. Roy Choudhury, *Arabidopsis Transmembrane Receptor-Like Kinases (RLKs): A Bridge between Extracellular Signal and Intracellular Regulatory Machinery*. Int J Mol Sci, 2020. **21**(11).
12. Hayama, R., et al., *Ubiquitin carboxyl-terminal hydrolases are required for period maintenance of the circadian clock at high temperature in Arabidopsis*. Sci Rep, 2019. **9**(1): p. 17030.
13. Hashida, S.N., H. Takahashi, and H. Uchimiya, *The role of NAD biosynthesis in plant development and stress responses*. Ann Bot, 2009. **103**(6): p. 819-24.
14. Zhou, J., et al., *MYB58 and MYB63 are transcriptional activators of the lignin biosynthetic pathway during secondary cell wall formation in Arabidopsis*. Plant Cell, 2009. **21**(1): p. 248-66.
15. Casaretto, J.A., et al., *Expression of OsMYB55 in maize activates stress-responsive genes and enhances heat and drought tolerance*. BMC Genomics, 2016. **17**: p. 312.
16. Feke, A., et al., *Decoys provide a scalable platform for the identification of plant E3 ubiquitin ligases that regulate circadian function*. Elife, 2019. **8**.
17. Yamada, M., et al., *The TRANSPORT INHIBITOR RESPONSE2 gene is required for auxin synthesis and diverse aspects of plant development*. Plant Physiol, 2009. **151**(1): p. 168-79.
18. Ojolo, S.P., et al., *Regulation of Plant Growth and Development: A Review From a Chromatin Remodeling Perspective*. Front Plant Sci, 2018. **9**: p. 1232.
19. Kumar, S.V. and P.A. Wigge, *H2A.Z-containing nucleosomes mediate the thermosensory response in Arabidopsis*. Cell, 2010. **140**(1): p. 136-47.
20. Galindo-González, L., et al., *LTR-retrotransposons in plants: Engines of evolution*. Gene, 2017. **626**: p. 14-25.
21. Makarevitch, I., et al., *Correction: Transposable Elements Contribute to Activation of Maize Genes in Response to Abiotic Stress*. PLoS Genet, 2015. **11**(10): p. e1005566.
22. Wickland, D.P. and Y. Hanzawa, *The FLOWERING LOCUS T/TERMINAL FLOWER 1 Gene Family: Functional Evolution and Molecular Mechanisms*. Mol Plant, 2015. **8**(7): p. 983-97.
23. Cao, X., et al., *The Roles of Auxin Biosynthesis YUCCA Gene Family in Plants*. Int J Mol Sci, 2019. **20**(24).
24. Li, H., et al., *Identification and expression analysis of the GDSL esterase/lipase family genes, and the characterization of*. PeerJ, 2019. **7**: p. e6741.
25. Naramoto, S., et al., *Phosphoinositide-dependent regulation of VAN3 ARF-GAP localization and activity essential for vascular tissue continuity in plants*. Development, 2009. **136**(9): p. 1529-38.
26. Carland, F. and T. Nelson, *CVP2- and CVL1-mediated phosphoinositide signaling as a regulator of the ARF GAP SFC/VAN3 in establishment of foliar vein patterns*. Plant J, 2009. **59**(6): p. 895-907.
27. Ream, T.S., et al., *Subunit compositions of the RNA-silencing enzymes Pol IV and Pol V reveal their origins as specialized forms of RNA polymerase II*. Mol Cell, 2009. **33**(2): p. 192-203.
28. Kashyap, S.P., et al., *Understanding salt tolerance mechanism using transcriptome profiling and de novo assembly of wild tomato Solanum chilense*. Sci Rep, 2020. **10**(1): p. 15835.
29. Furutani, M., et al., *Polar recruitment of RLD by LAZY1-like protein during gravity signaling in root branch angle control*. Nat Commun, 2020. **11**(1): p. 76.
30. Barkan, A. and I. Small, *Pentatricopeptide repeat proteins in plants*. Annu Rev Plant Biol, 2014. **65**: p. 415-42.
31. Baek, K., P.J. Seo, and C.M. Park, *Activation of a mitochondrial ATPase gene induces abnormal seed development in Arabidopsis*. Mol Cells, 2011. **31**(4): p. 361-9.
32. Kathiria, P., et al., *Effect of external and internal factors on the expression of reporter genes driven by the N resistance gene promoter*. Plant Signal Behav, 2013. **8**(7): p. e24760.
33. Guan, Q., et al., *A KH domain-containing putative RNA-binding protein is critical for heat stress-responsive gene regulation and thermotolerance in Arabidopsis*. Mol Plant, 2013. **6**(2): p. 386-95.

- 
34. Burdiak, P., et al., *Cysteine-rich receptor-like kinase CRK5 as a regulator of growth, development, and ultraviolet radiation responses in Arabidopsis thaliana*. J Exp Bot, 2015. **66**(11): p. 3325-37.
  35. Xia, K., et al., *Formation of Protein Disulfide Bonds Catalyzed by OsPDIL1;1 is Mediated by MicroRNA5144-3p in Rice*. Plant Cell Physiol, 2018. **59**(2): p. 331-342.
  36. Shu, K. and W. Yang, *E3 Ubiquitin Ligases: Ubiquitous Actors in Plant Development and Abiotic Stress Responses*. Plant Cell Physiol, 2017. **58**(9): p. 1461-1476.
  37. Chen, Y.L., et al., *The role of peptides cleaved from protein precursors in eliciting plant stress reactions*. New Phytol, 2020. **225**(6): p. 2267-2282.
  38. Pan, H., et al., *Gene, Environment and Methylation (GEM): a tool suite to efficiently navigate large scale epigenome wide association studies and integrate genotype and interaction between genotype and environment*. BMC Bioinformatics, 2016. **17**: p. 299.
